# Supplementary material for: No apparent influence of psychometrically-defined schizotypy on orientation-dependent contextual modulation of visual contrast detection
Source: PubMed Central journal article supplement (PMC5267566; doi:10.7717/peerj.2921), 2017-01-24

**Fig. S 1** Raw data and best-fitting psychometric functions for all participants (begins overleaf). The blue circles represent the proportion of correct responses within a given target contrast bin, with an area that is proportional to the number of trials. The solid black lines represent the best-fitting psychometric function, with the grey surrounding region capturing the bootstrapped 95% confidence interval. The dashed lines indicate the contrast detection threshold (the target contrast corresponding to 69.25% accuracy). The vertical axes are accuracy (proportion correct) and the horizontal axes are the target contrast (logarithmic spacing). The rows depict the four experimental conditions.

p1001

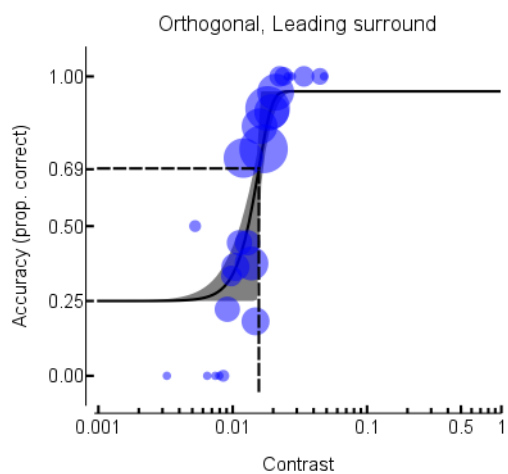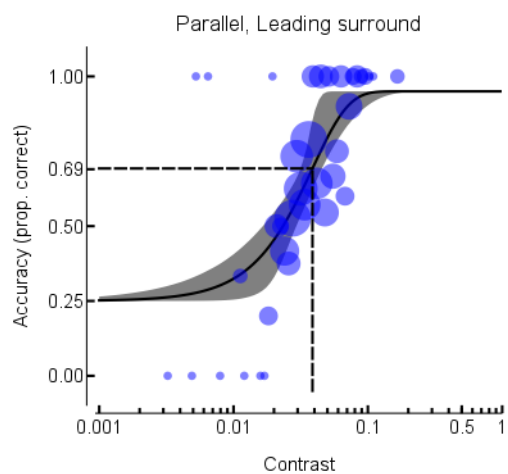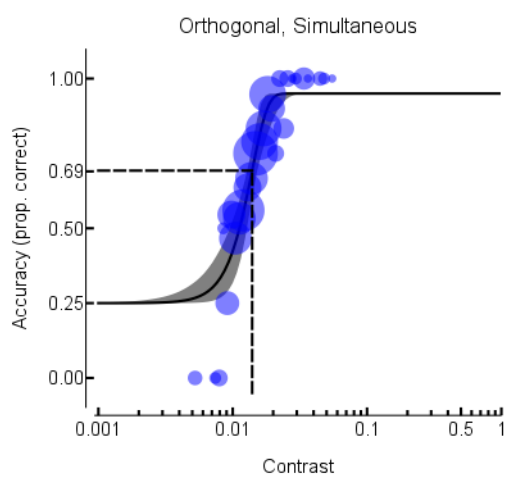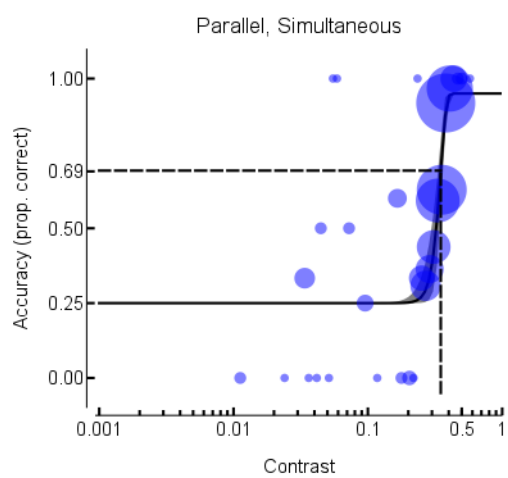

p1002

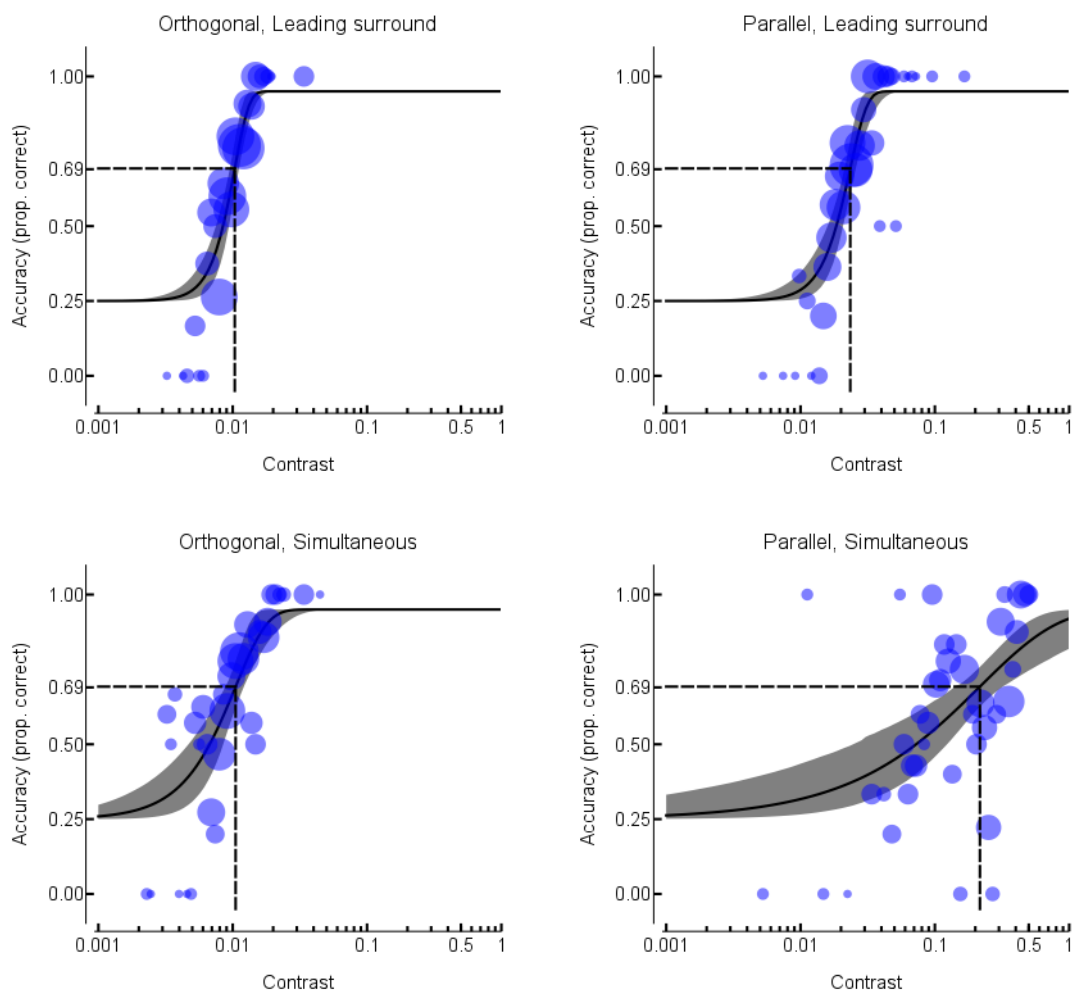

p1003

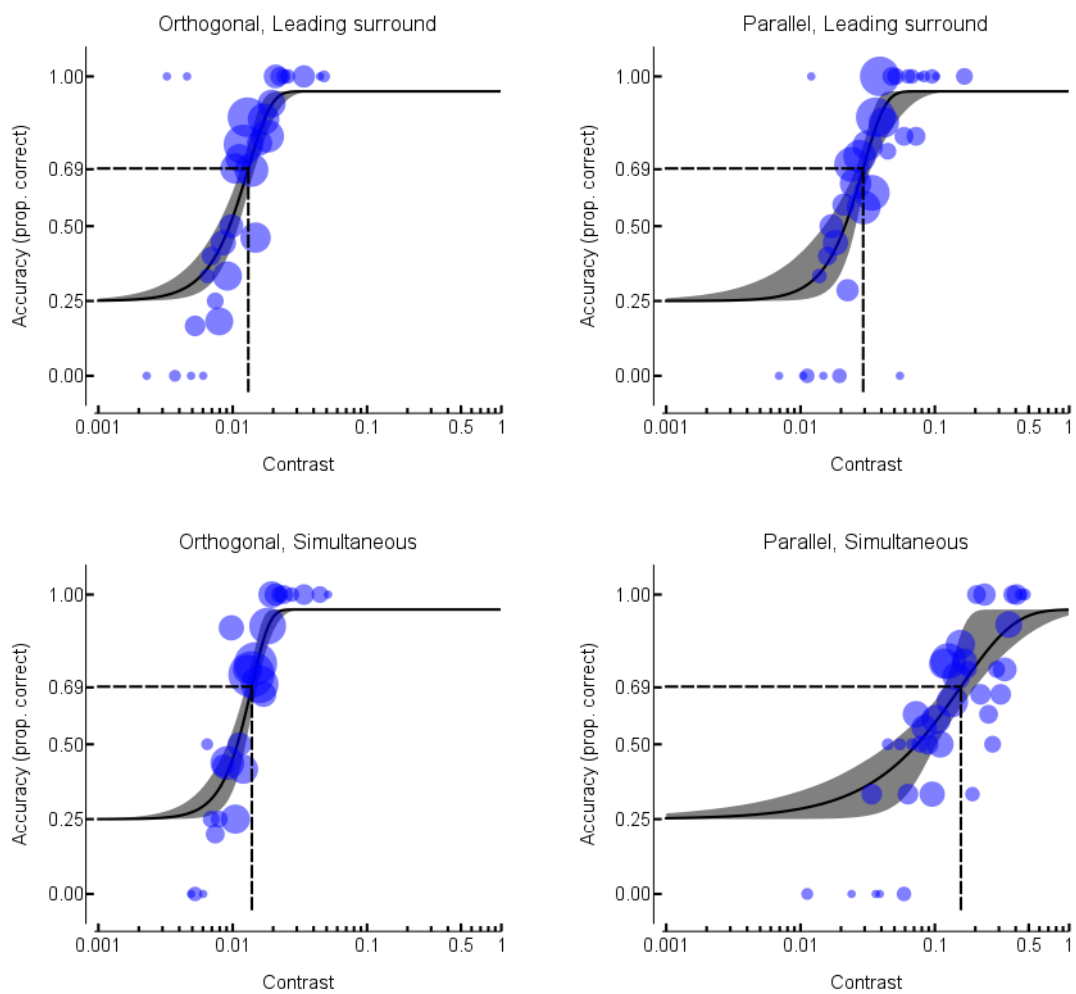



p1004

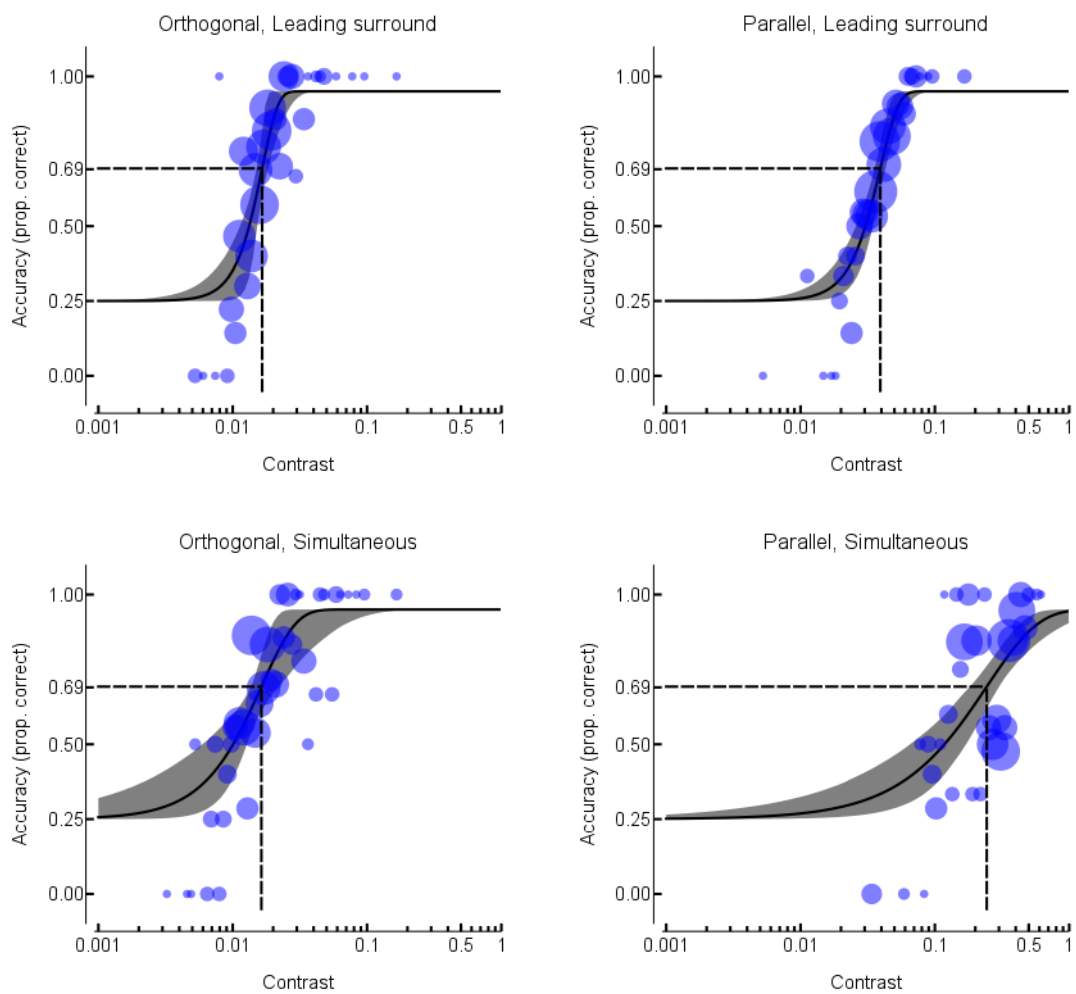

p1005

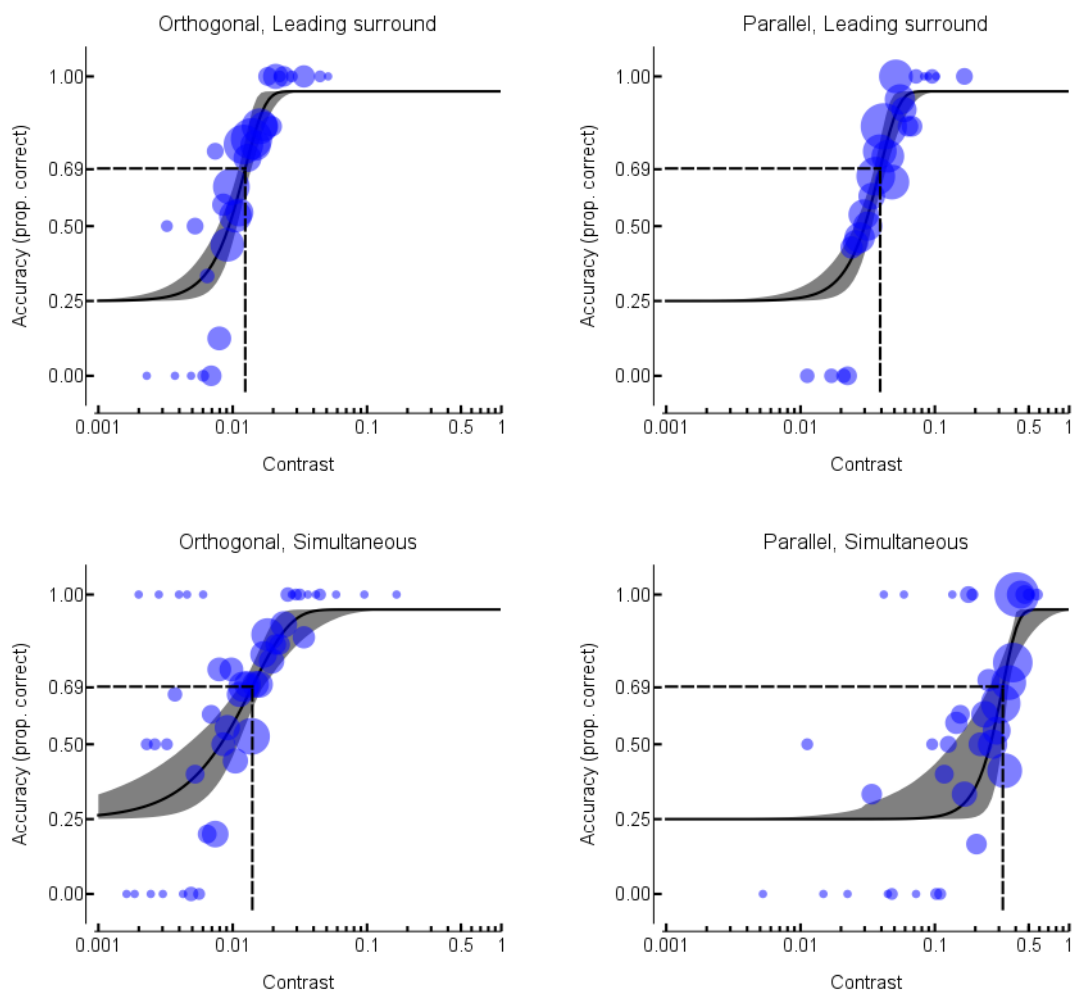

p1006

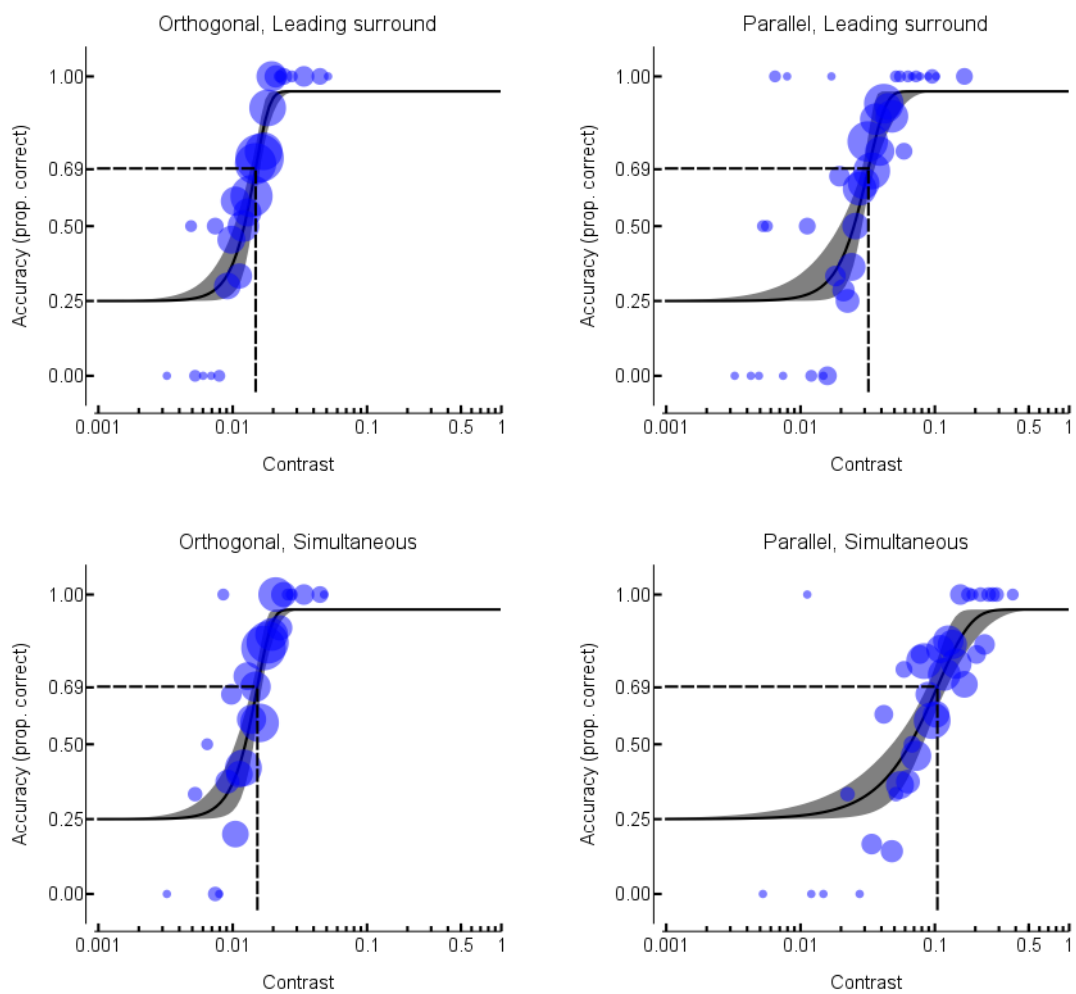

p1007

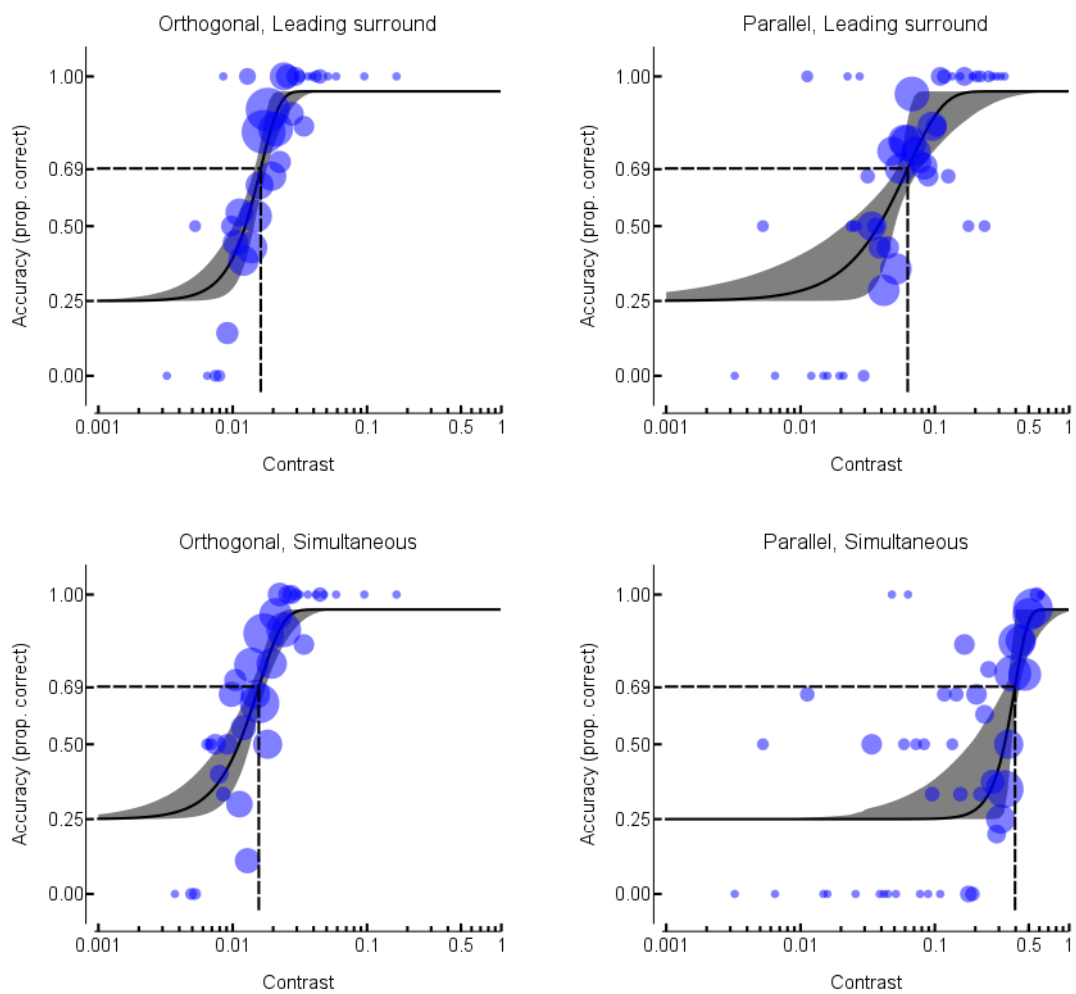

p1008

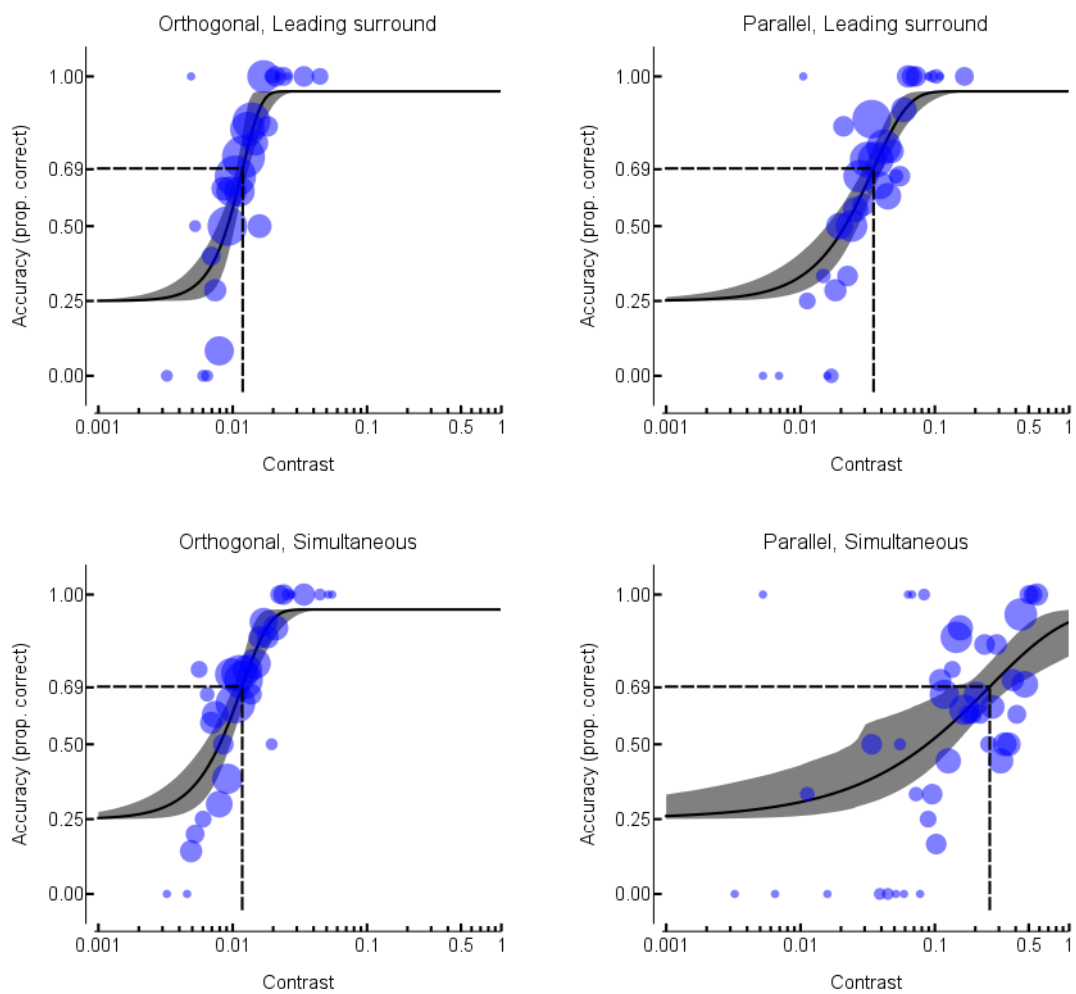

p1009

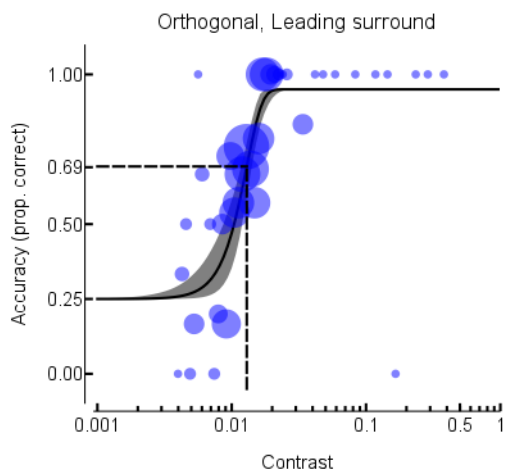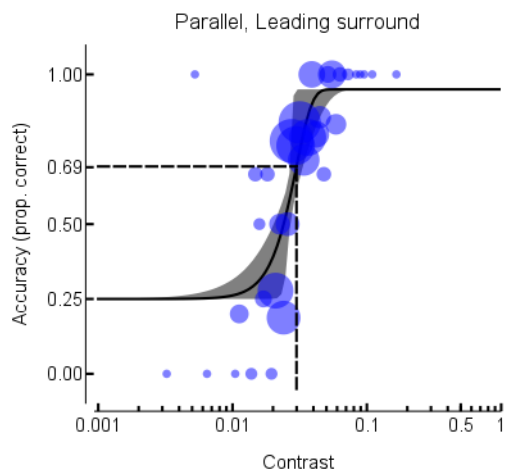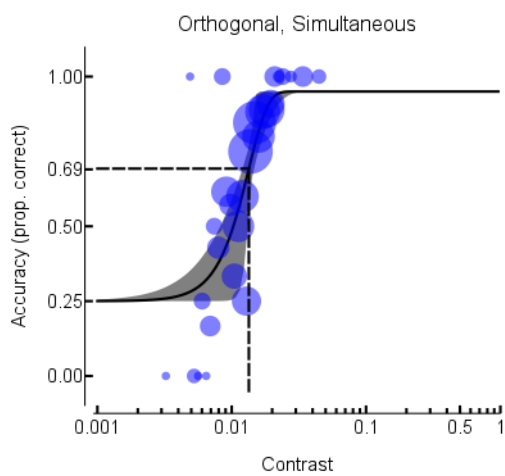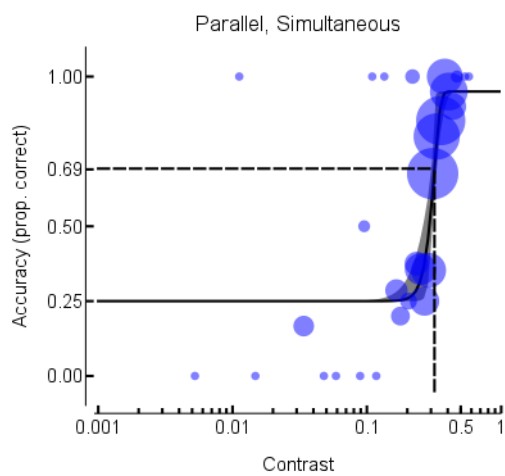

p1010

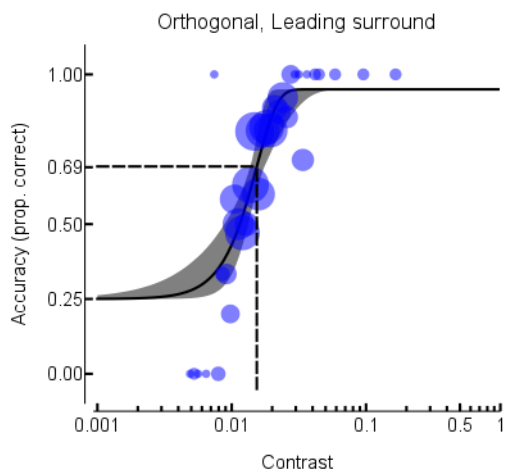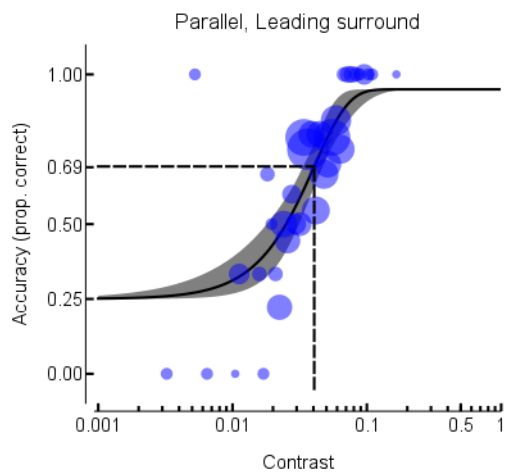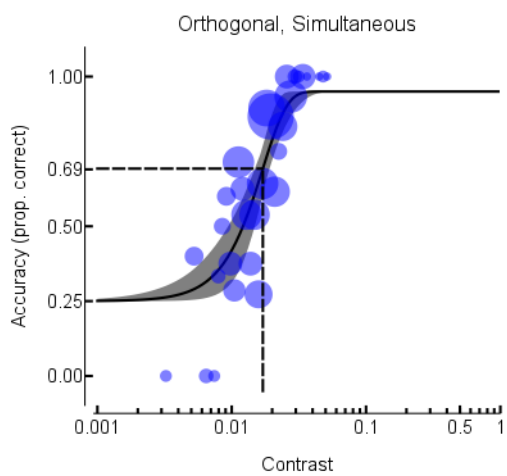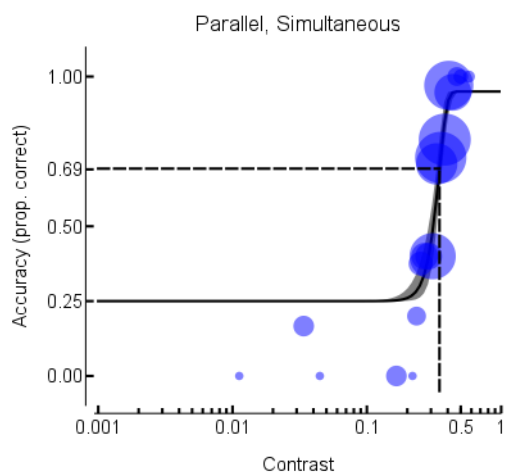

p1011

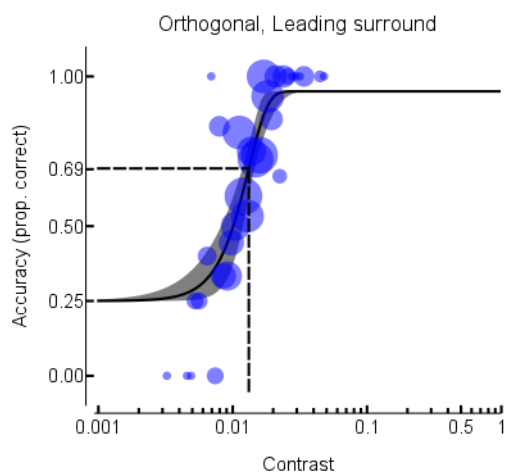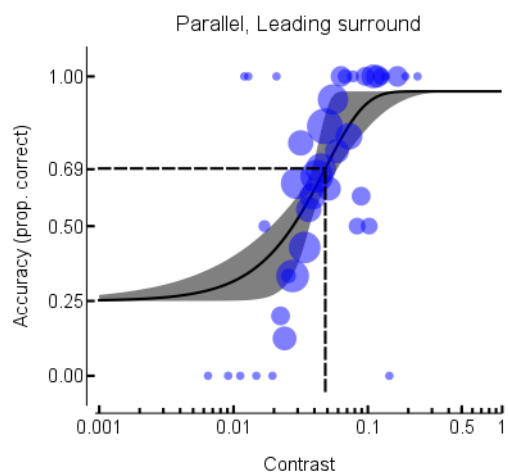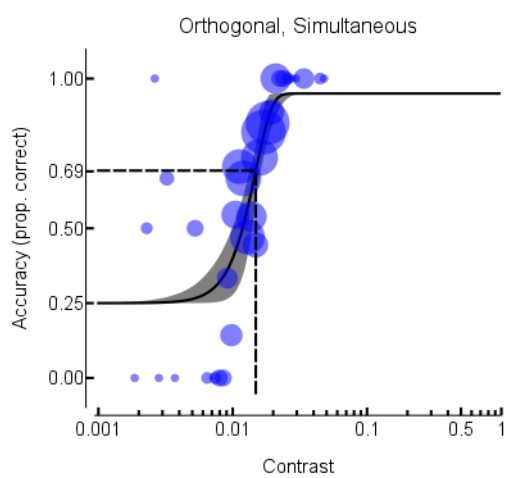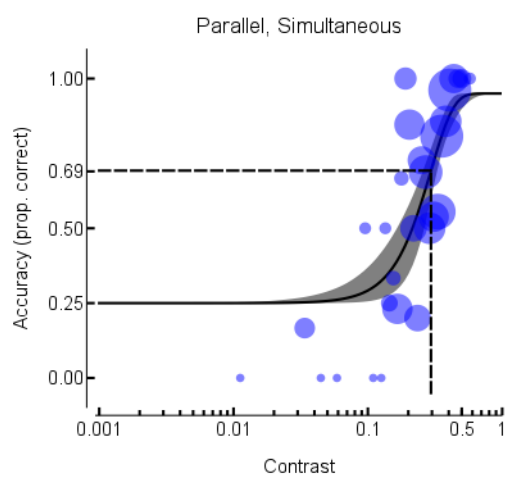



p1012

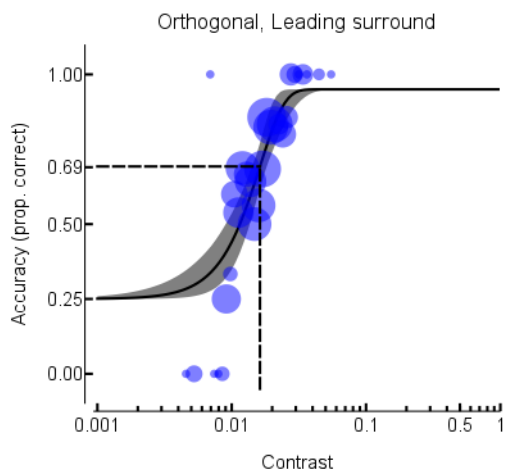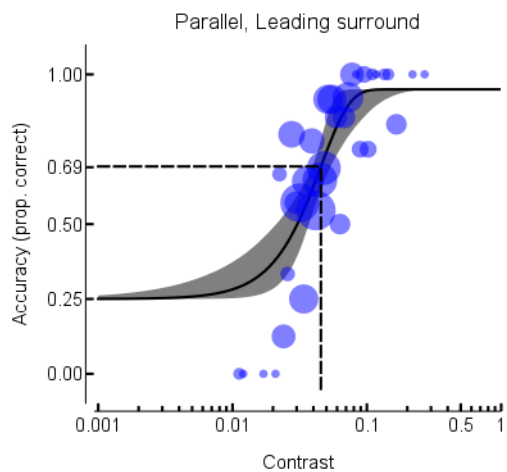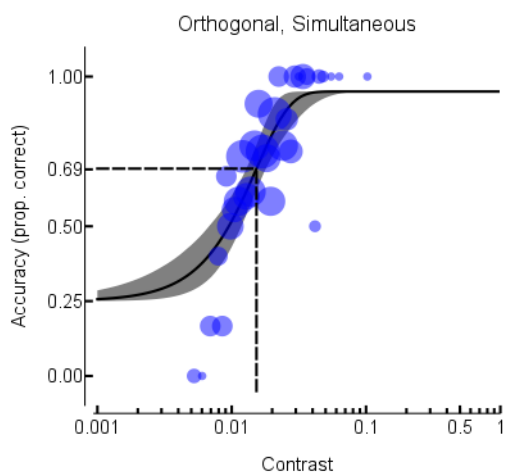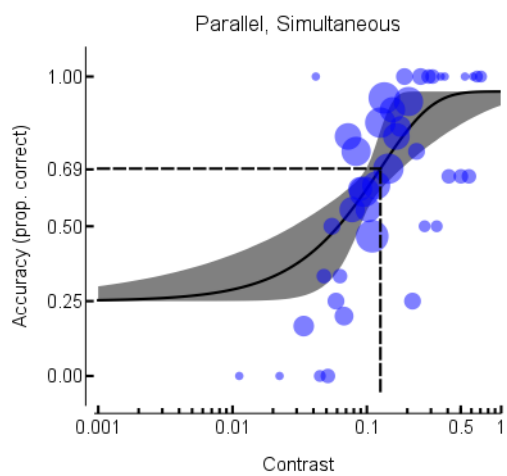

p1013

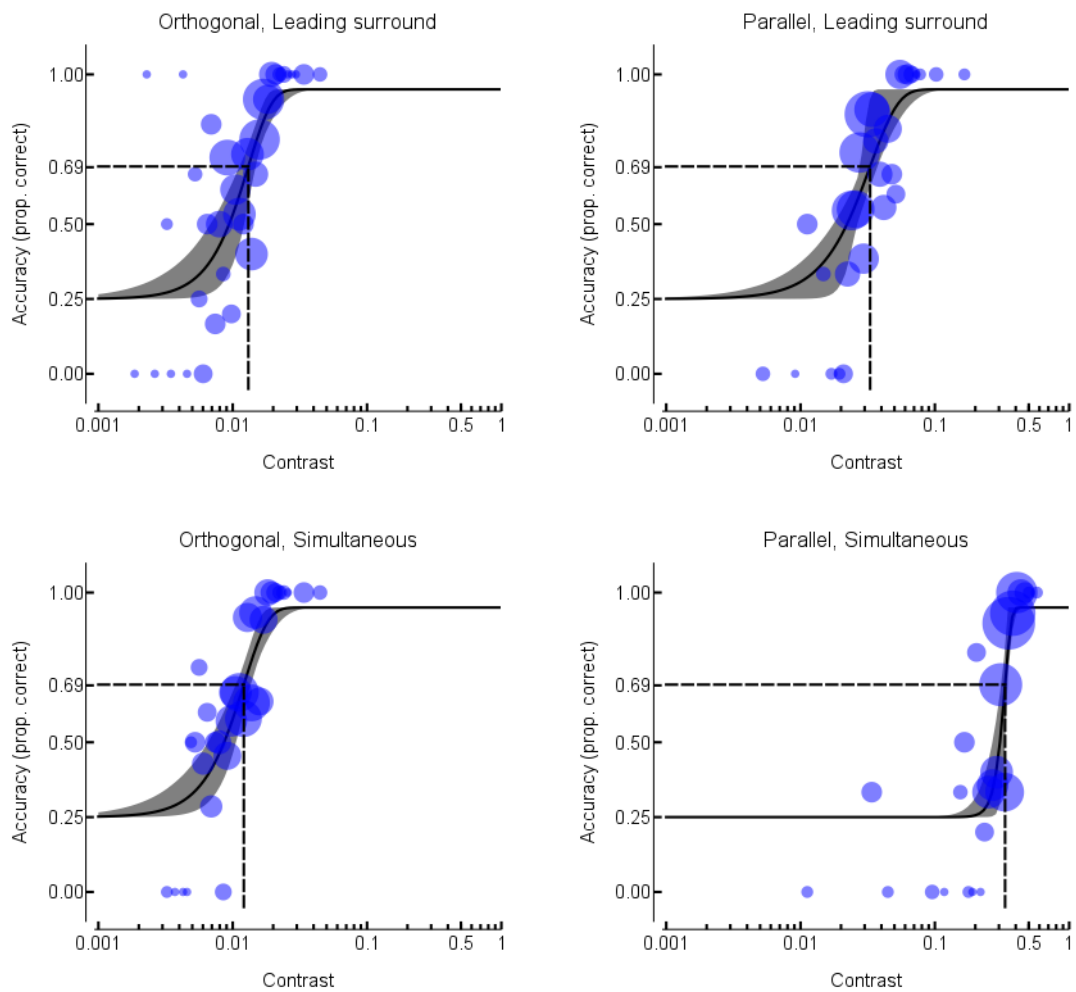

p1014

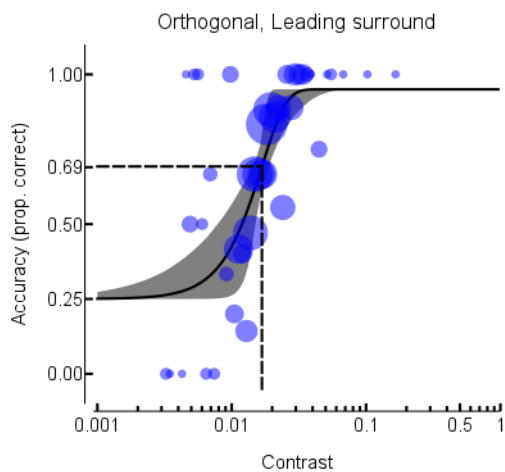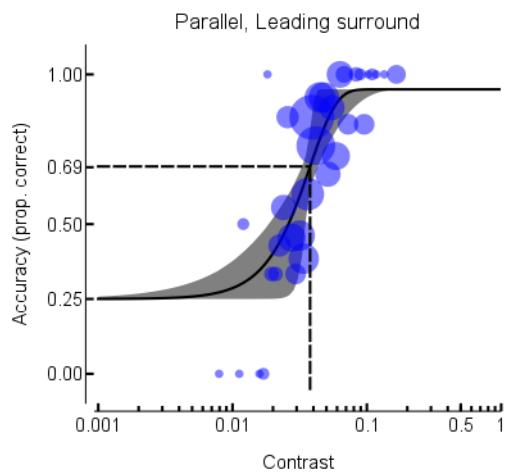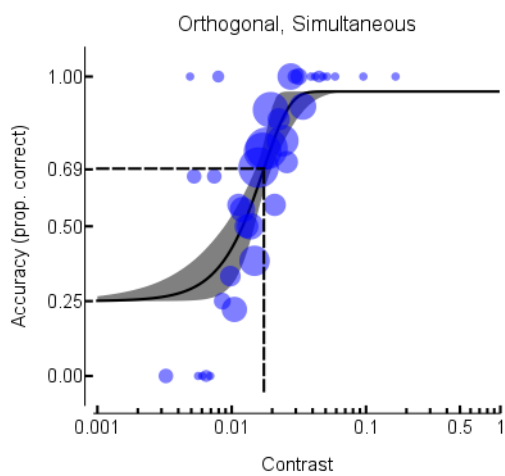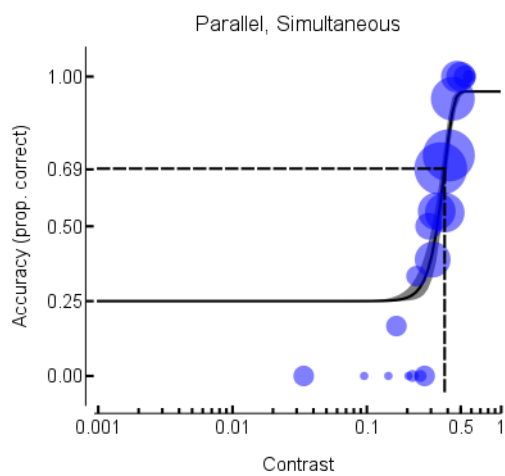

p1015

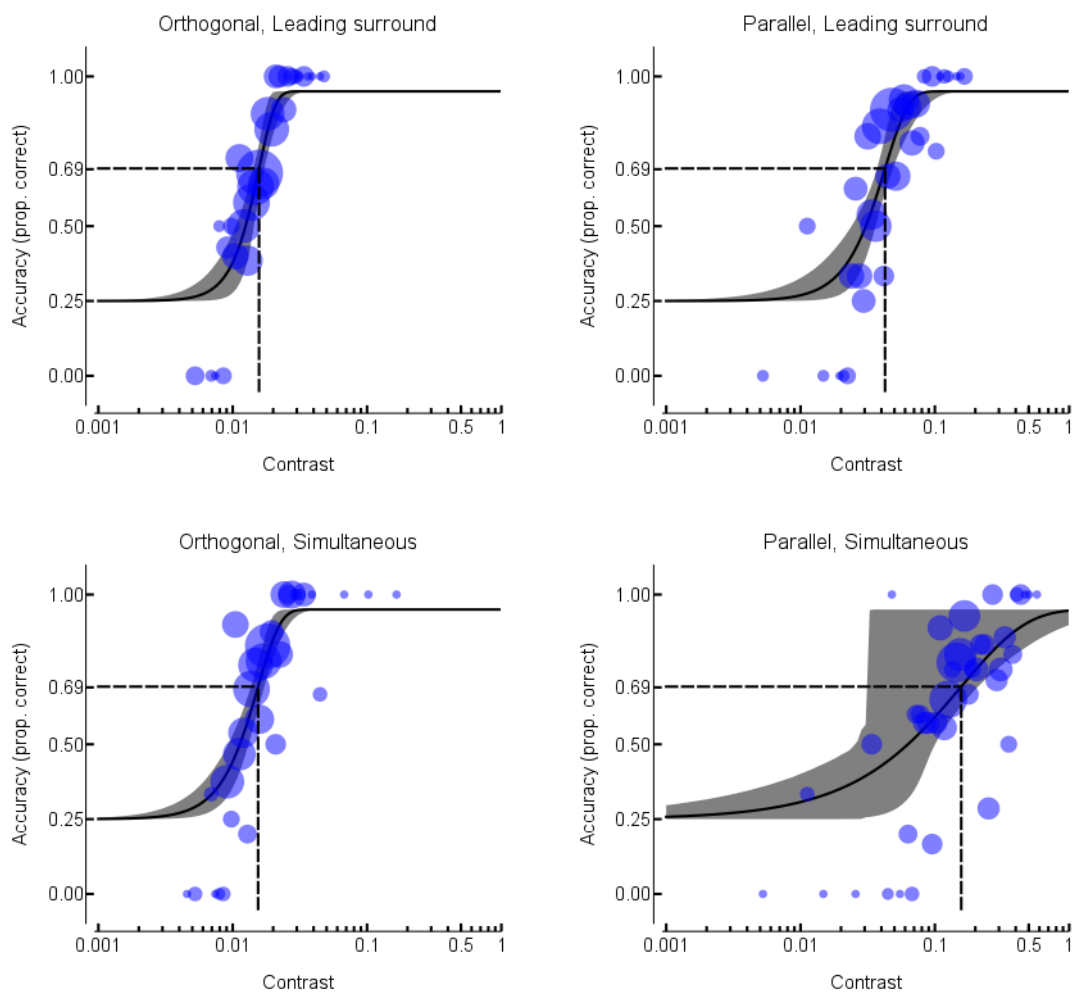

p1016

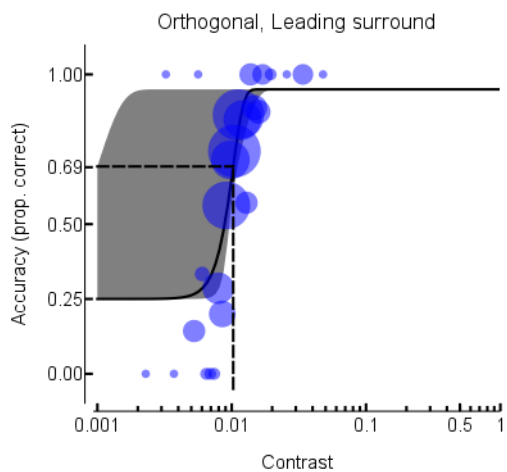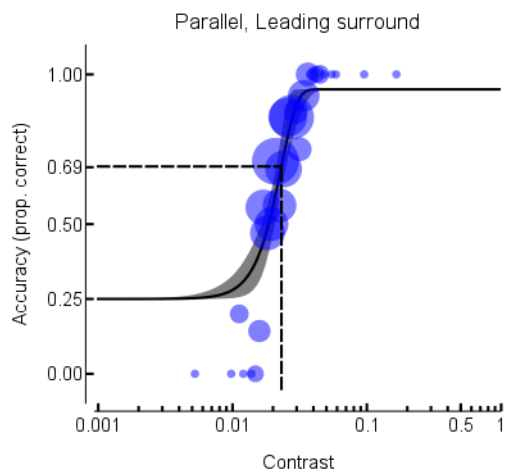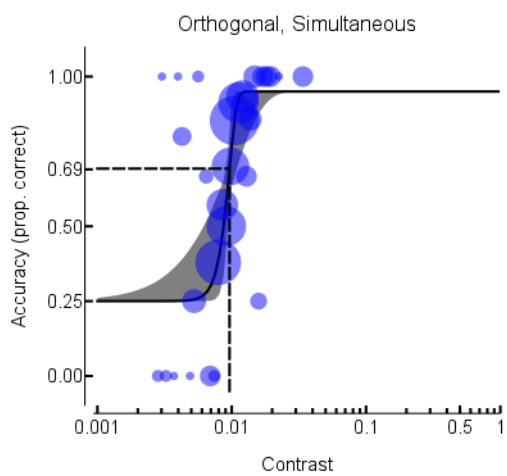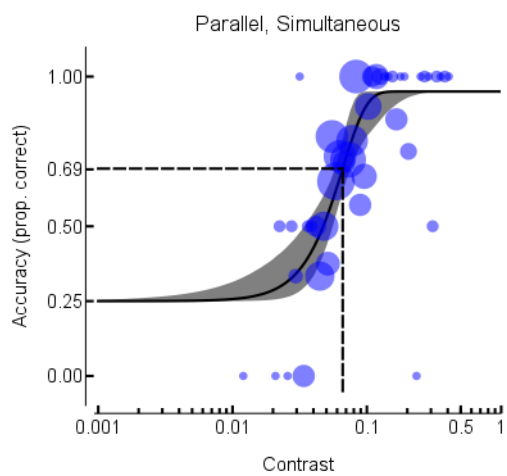

p1017

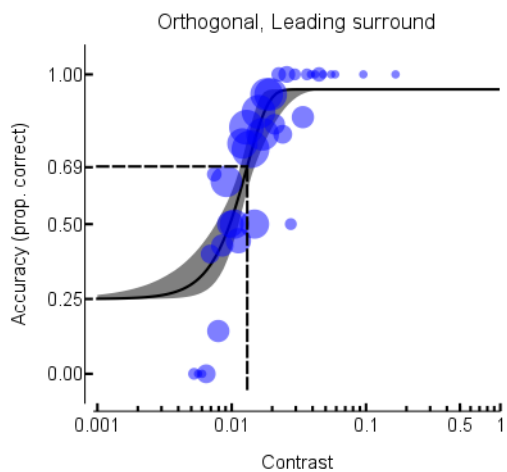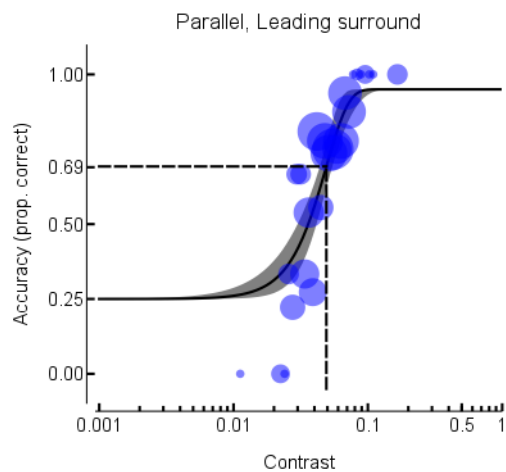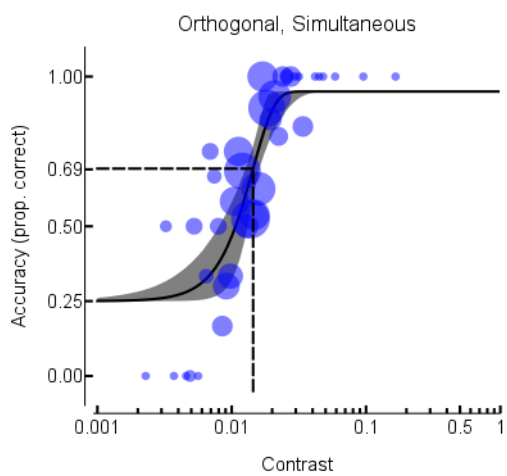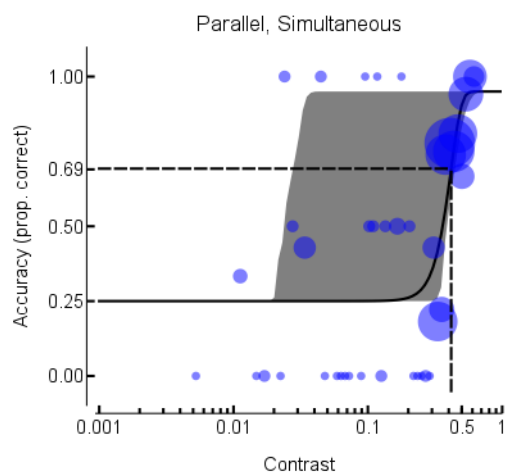

p1018

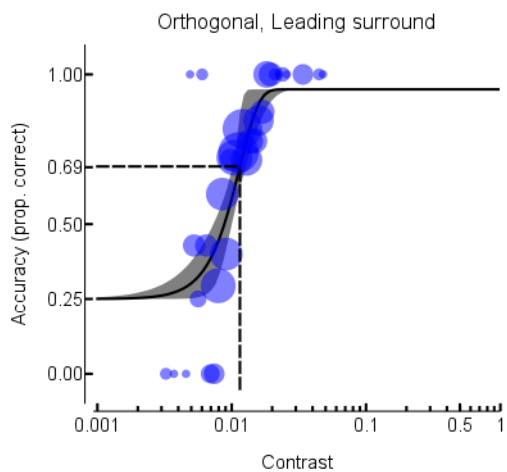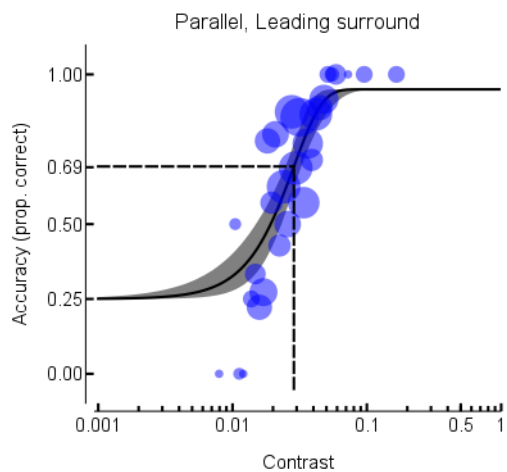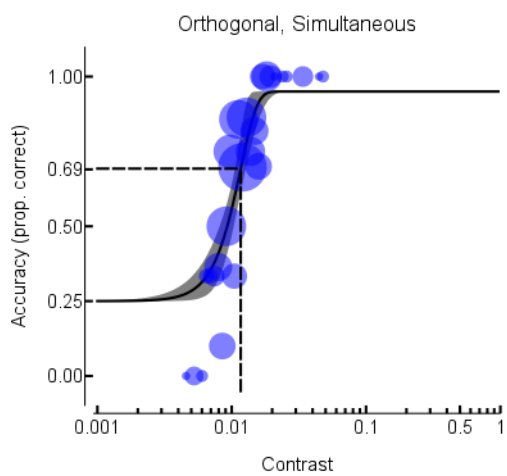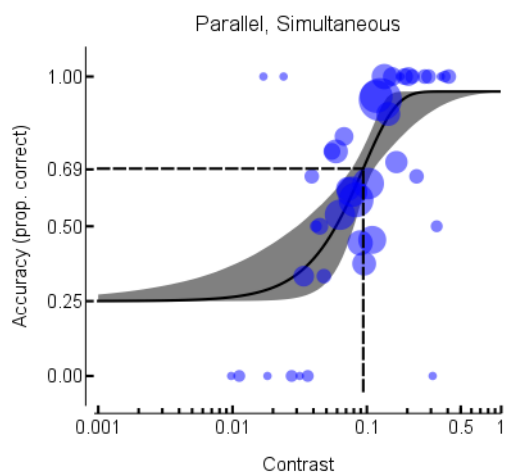

p1019

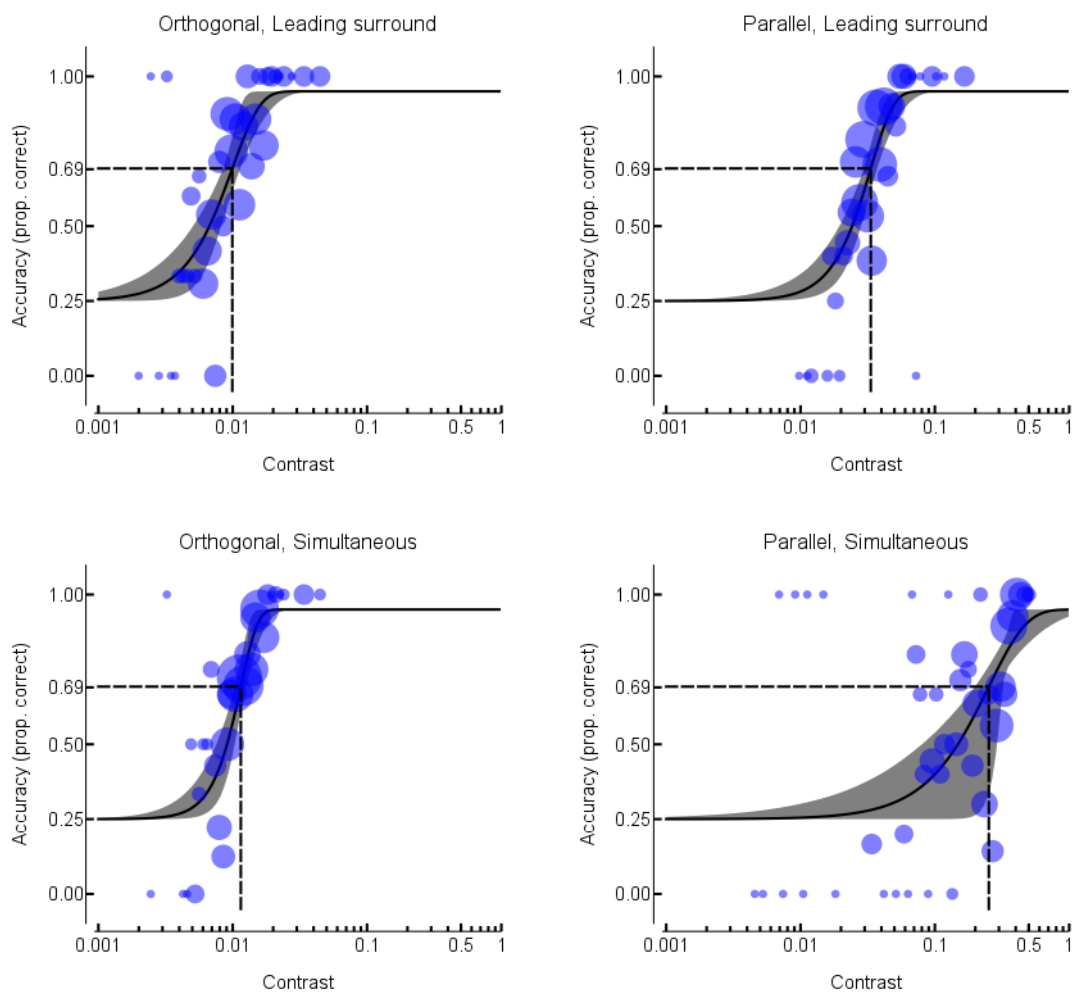



p1020

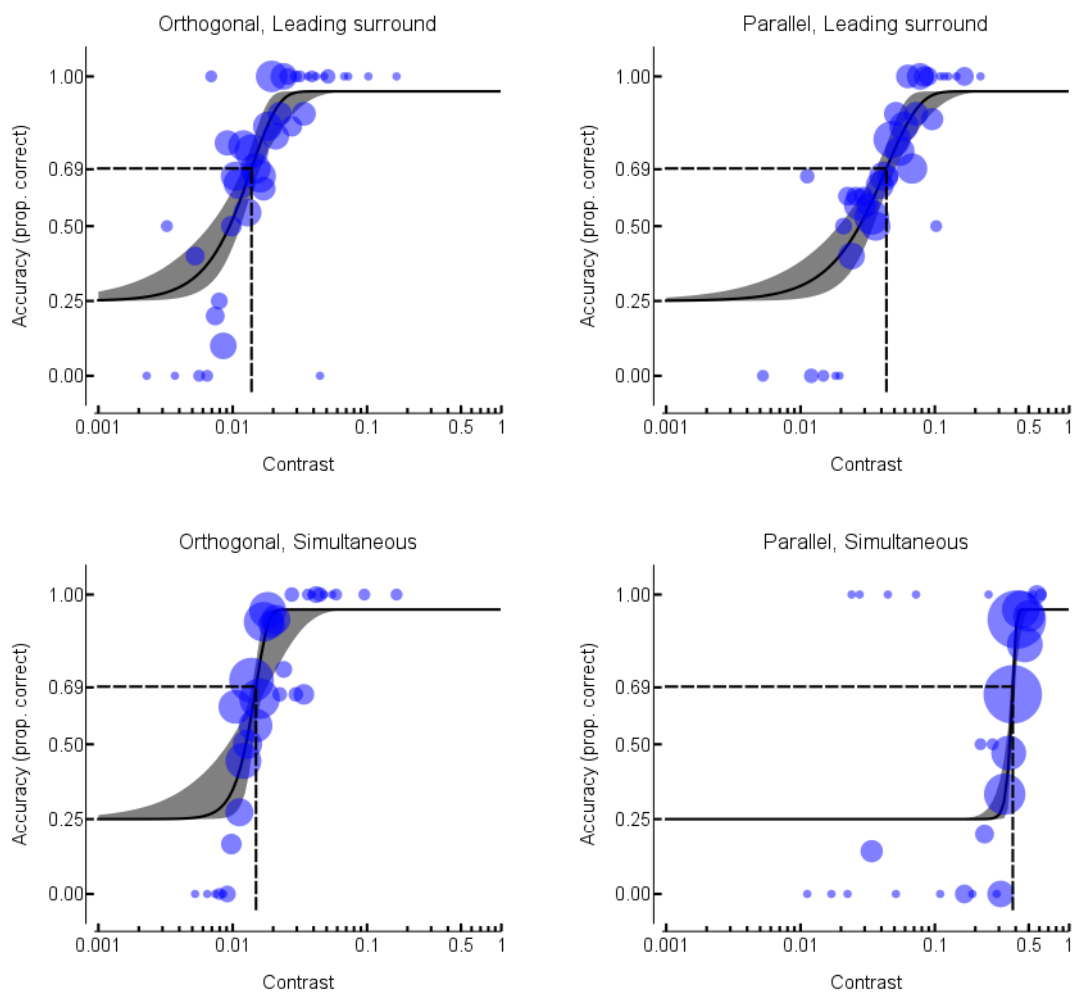

p1021

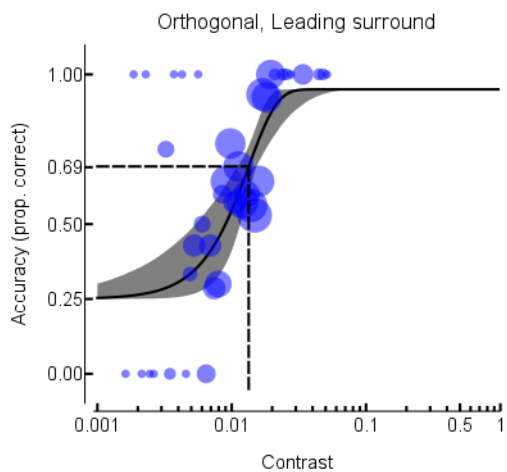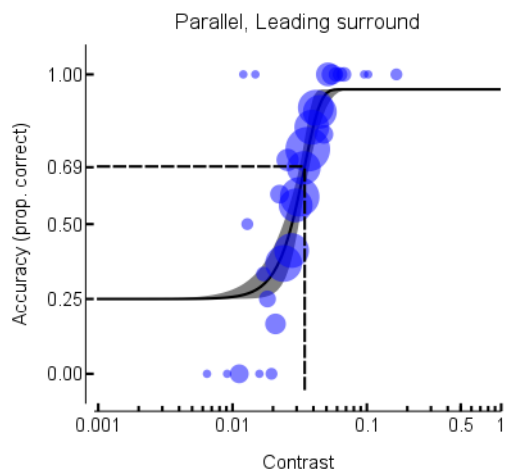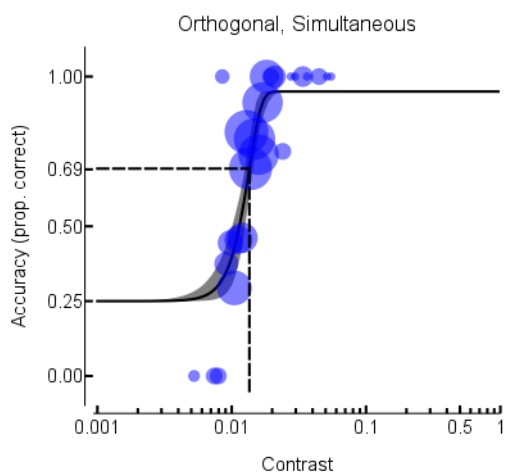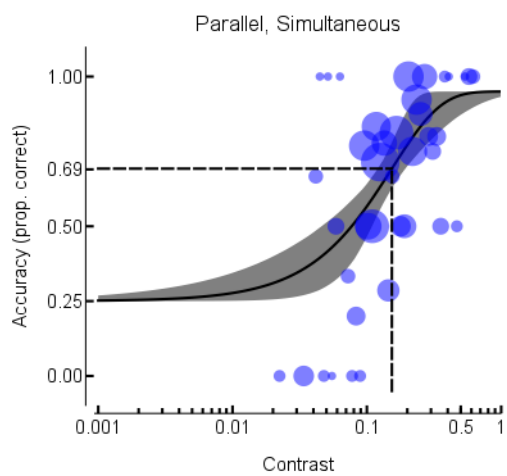

p1022

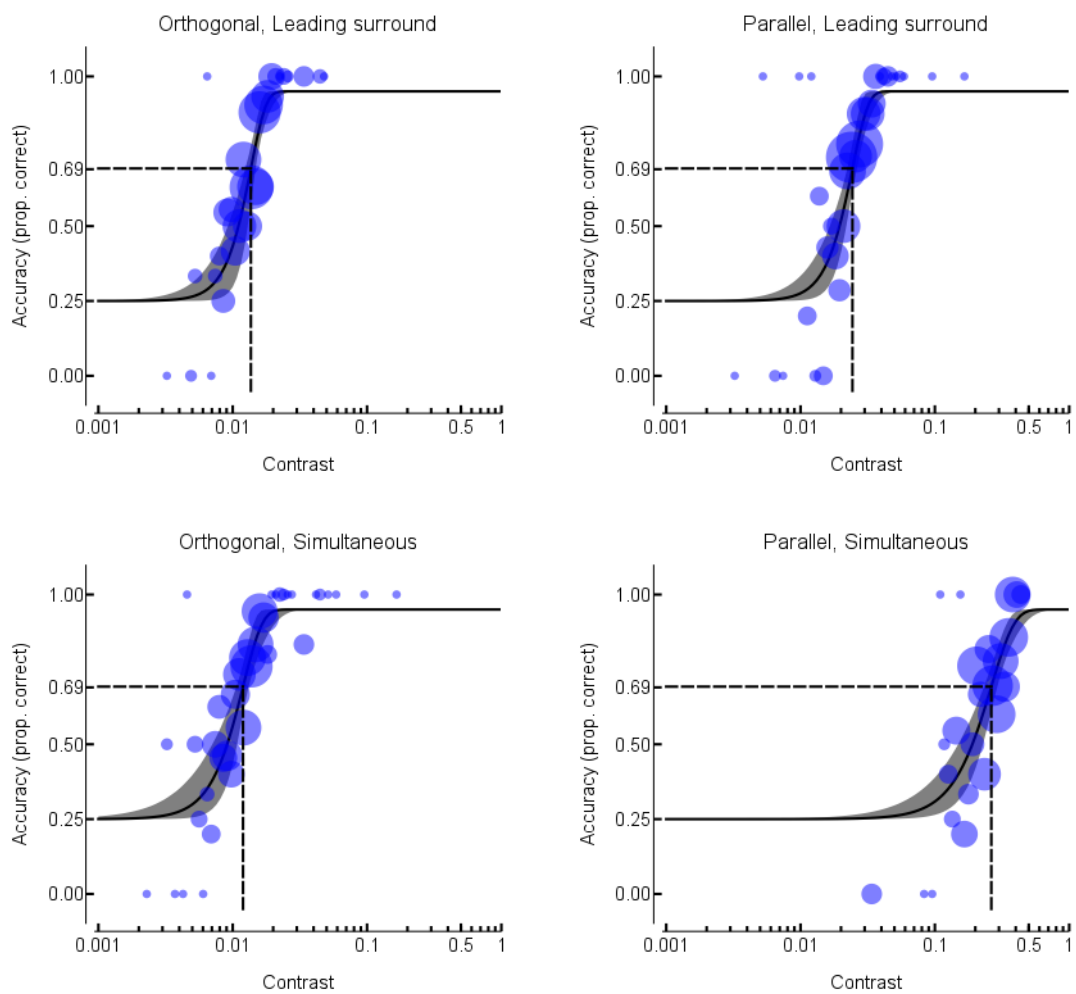

p1023

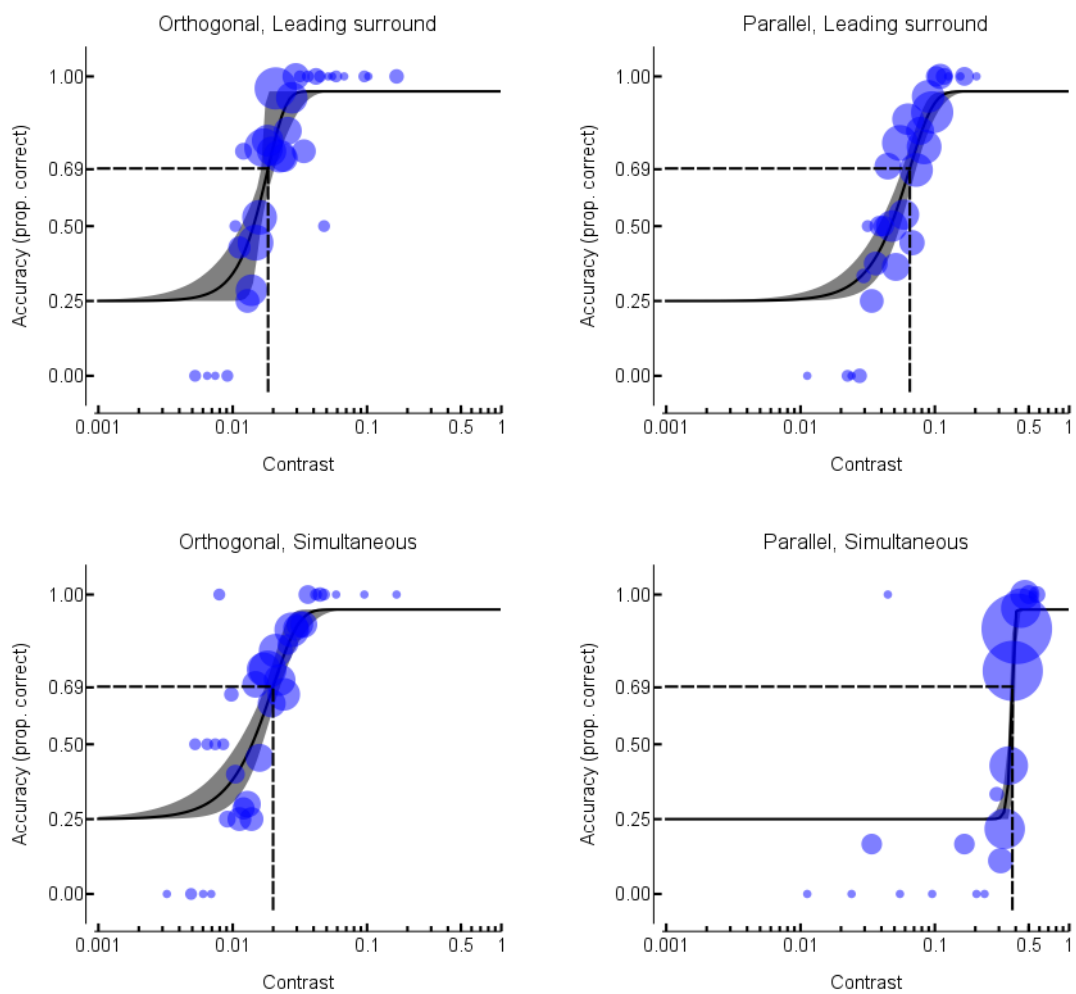

p1024

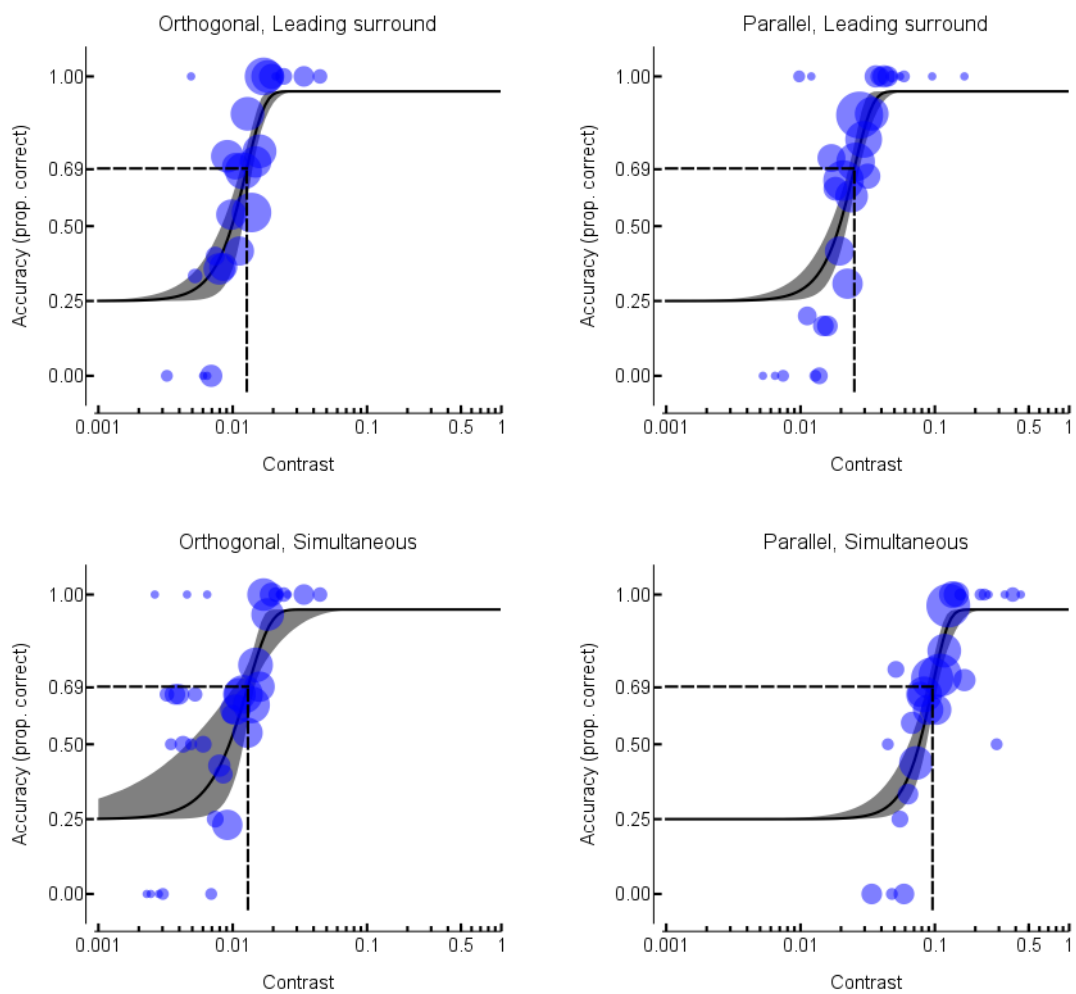

p1025

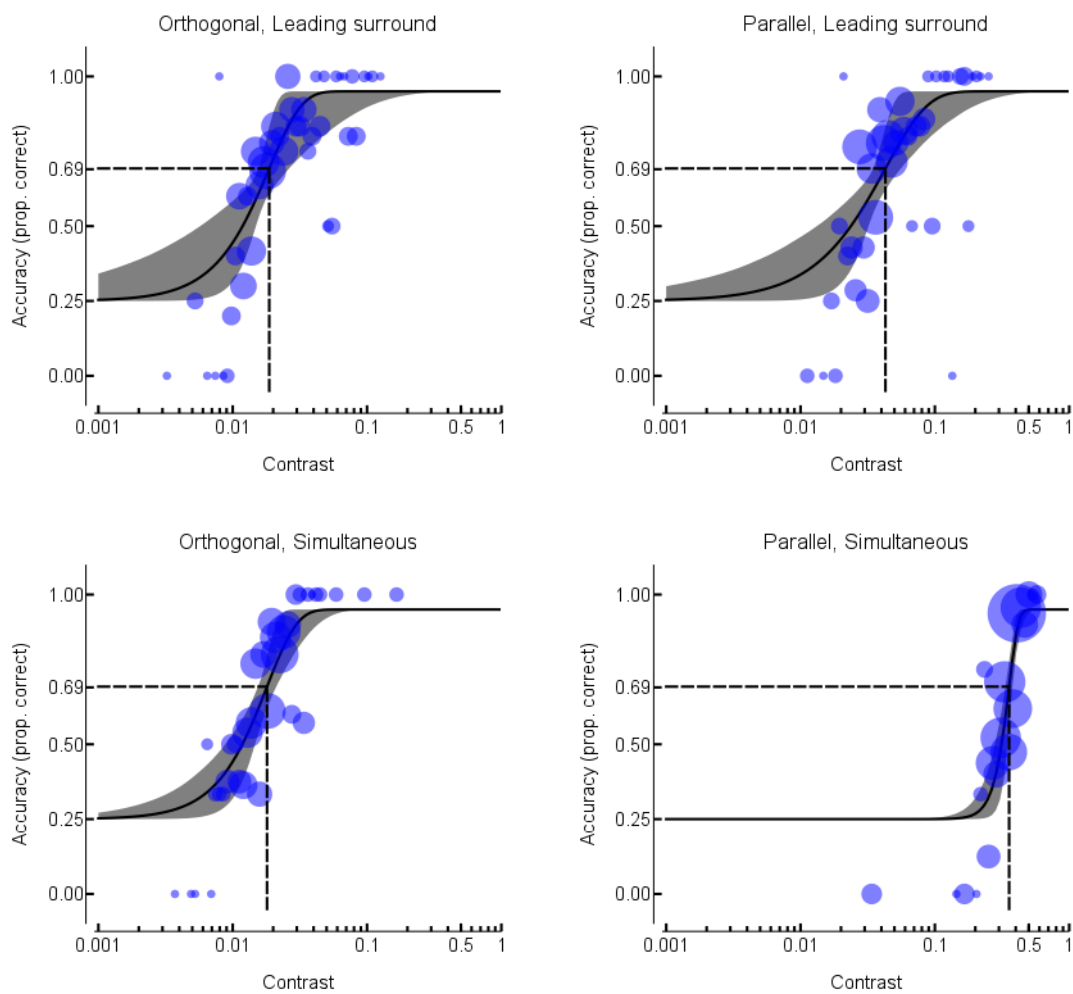

p1026

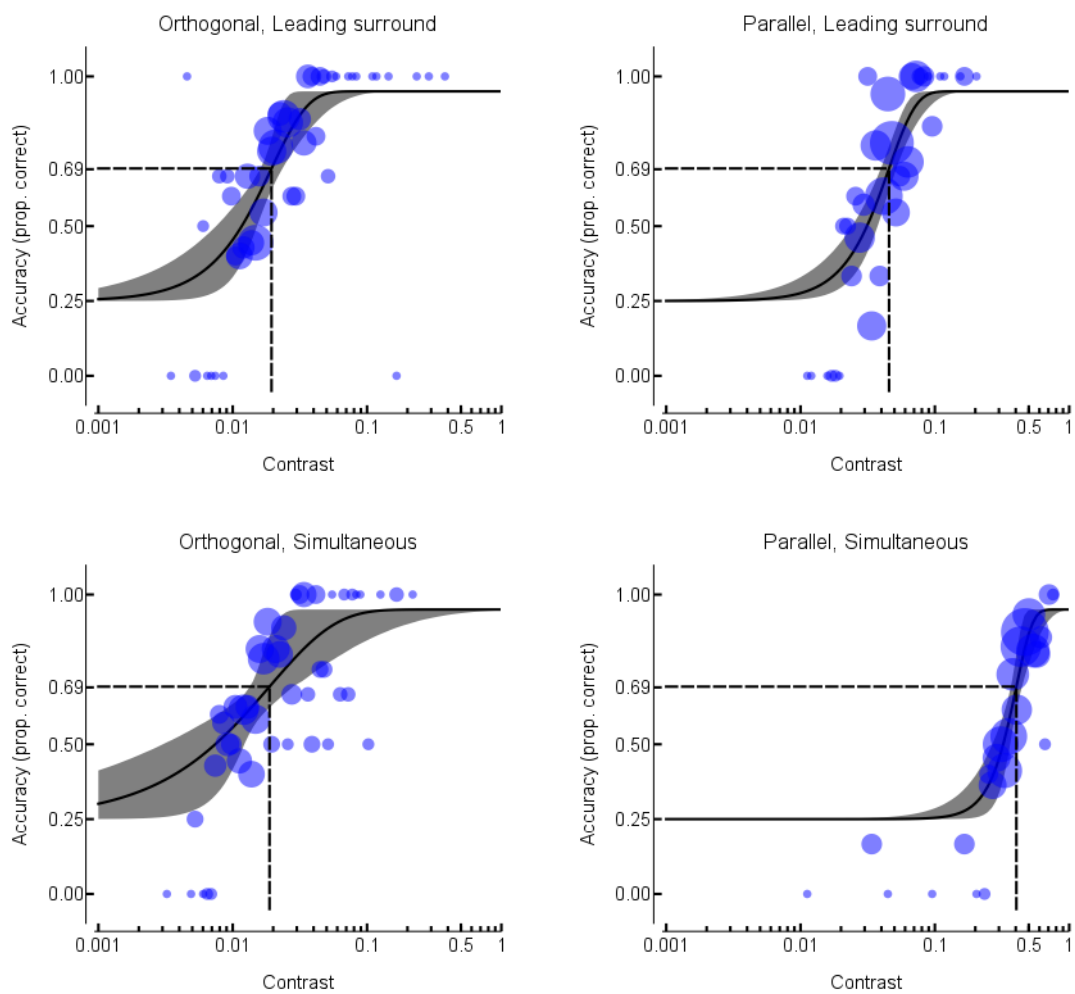

p1027 (excluded)

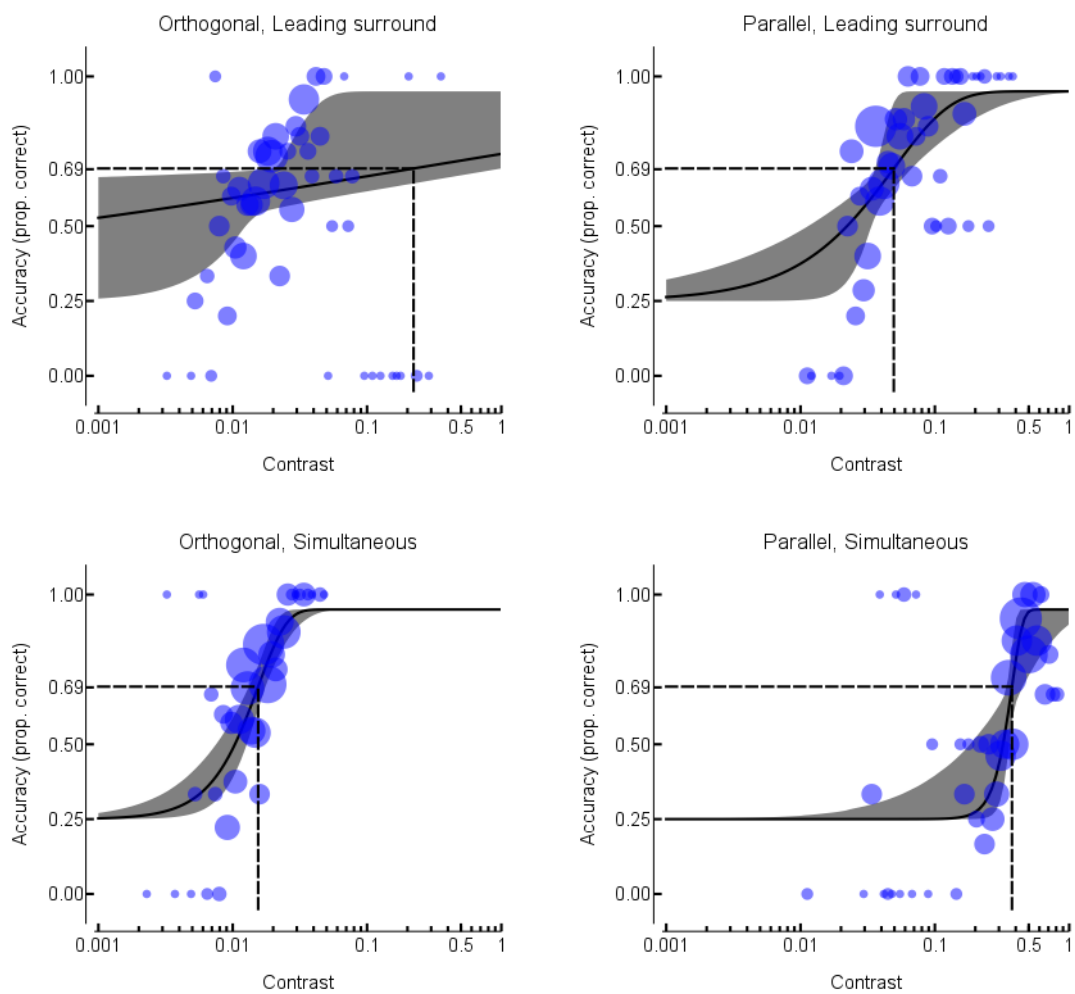



p1028

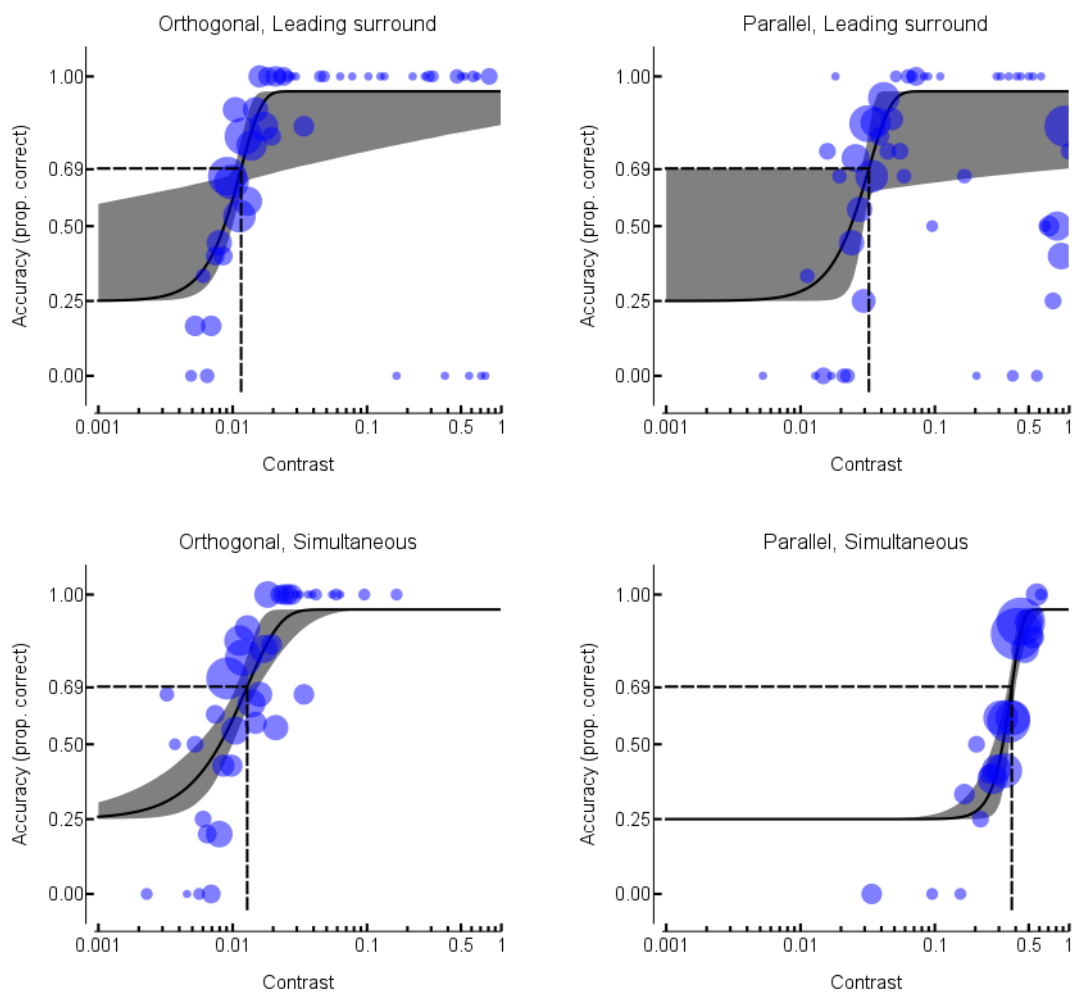

p1029

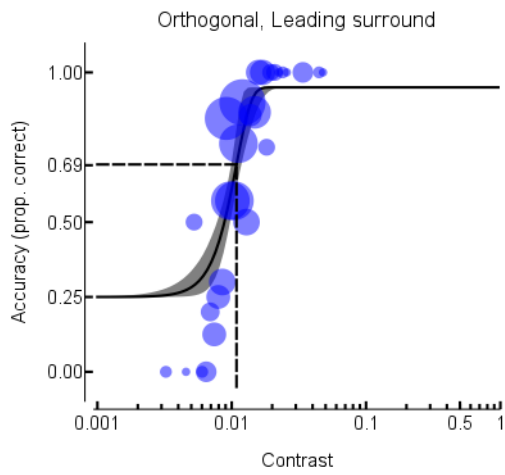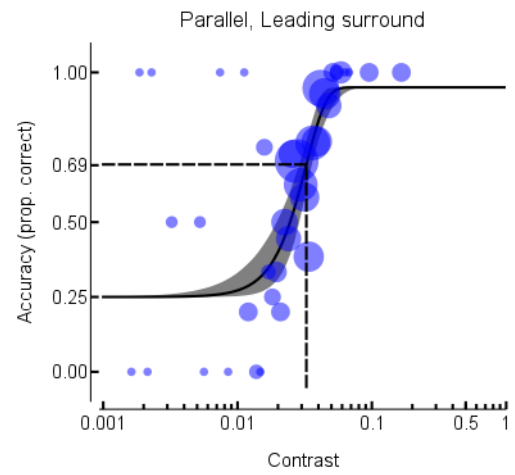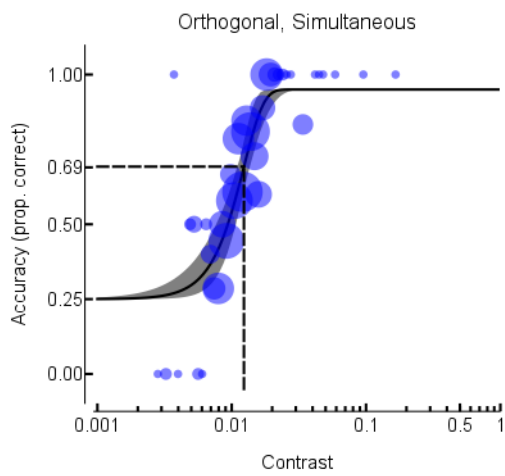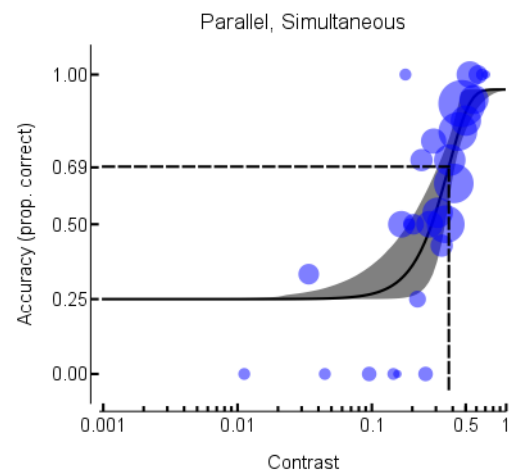

p1030

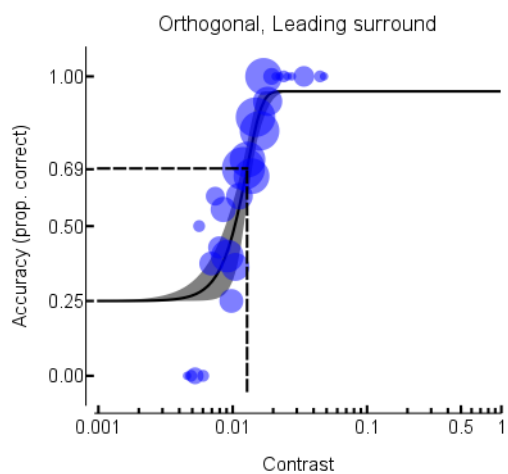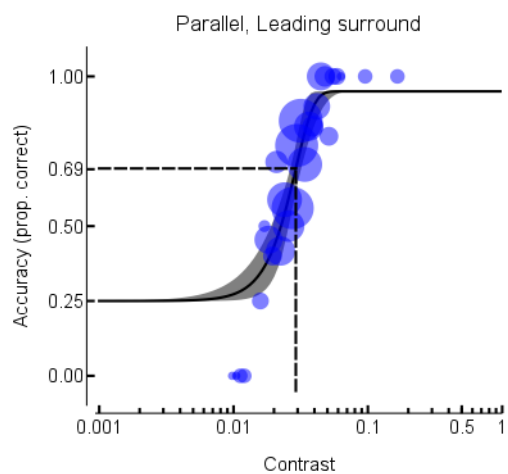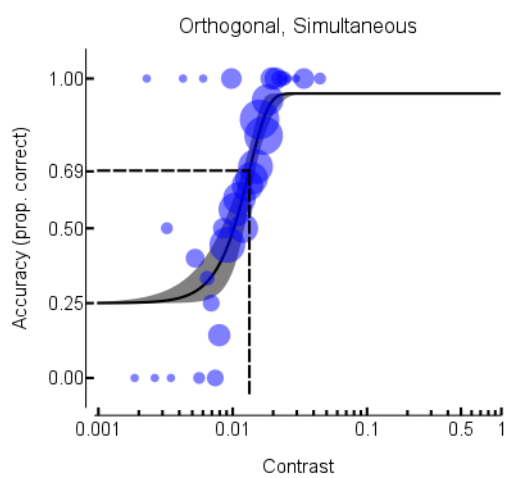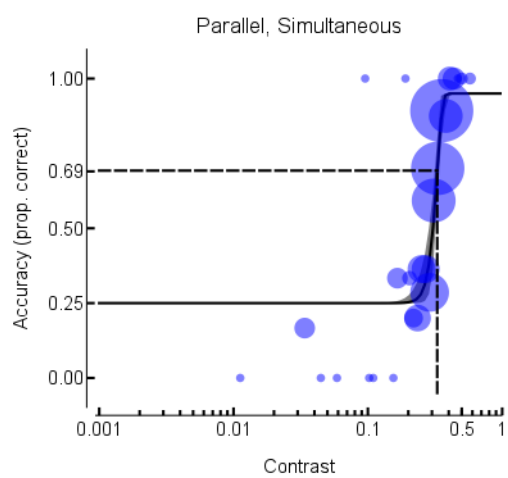

p1031

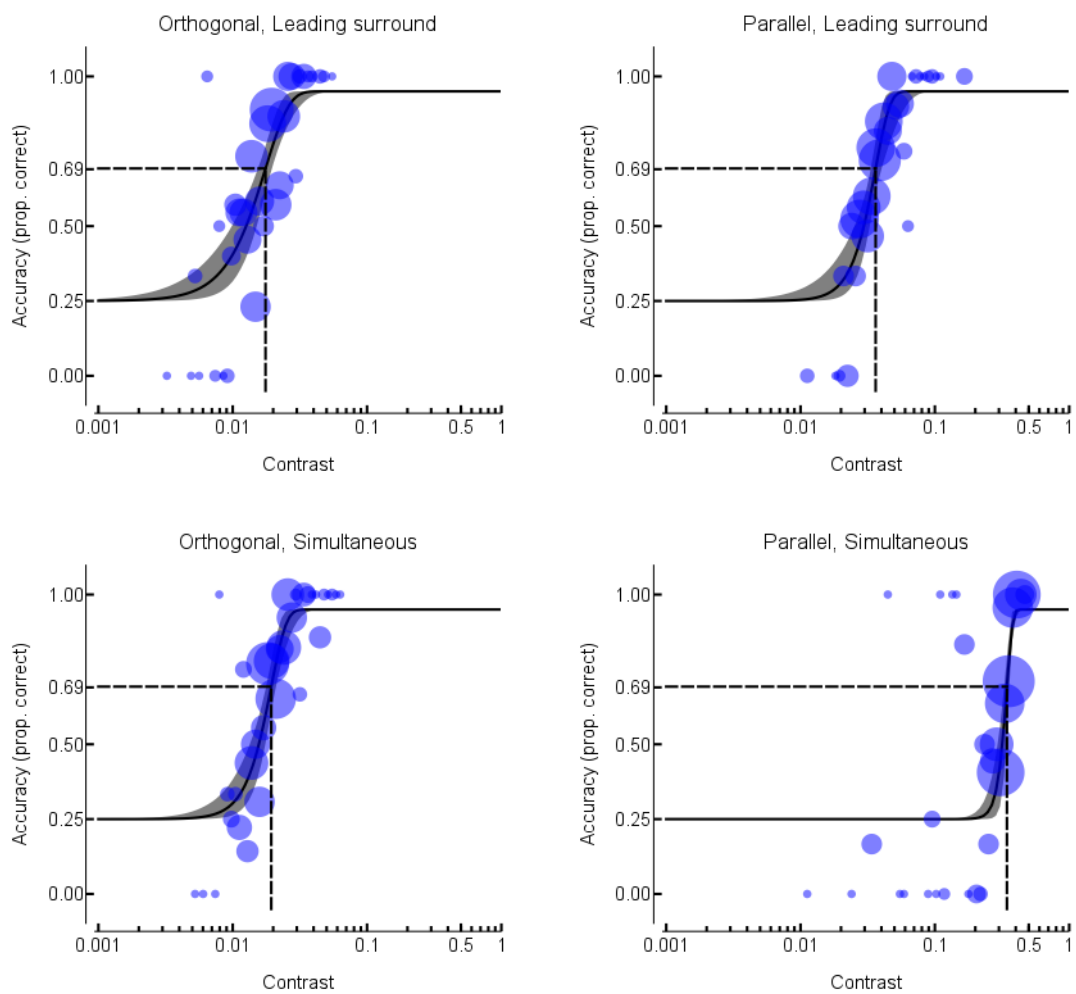

p1032

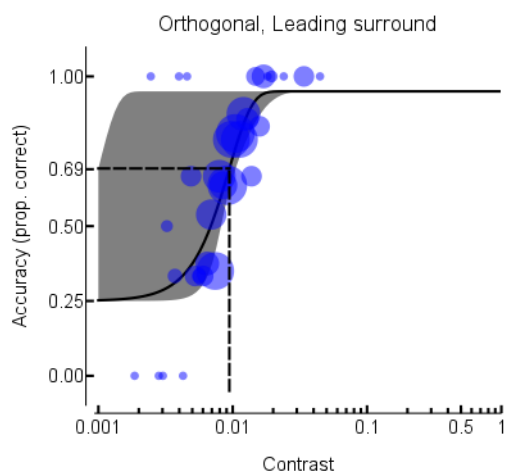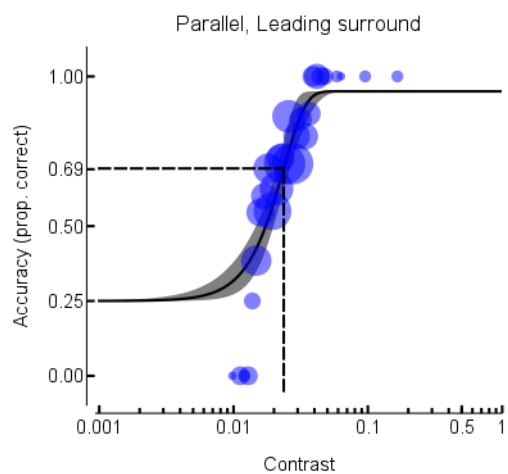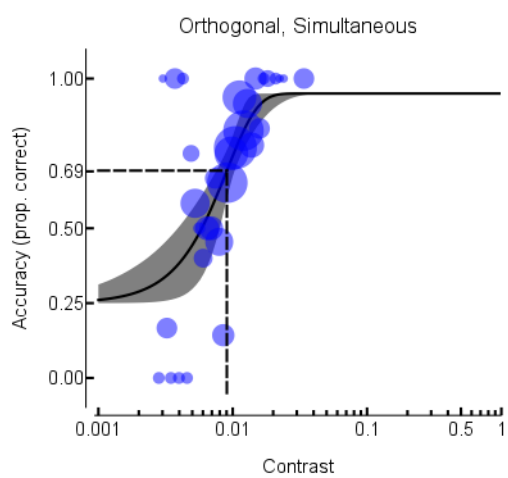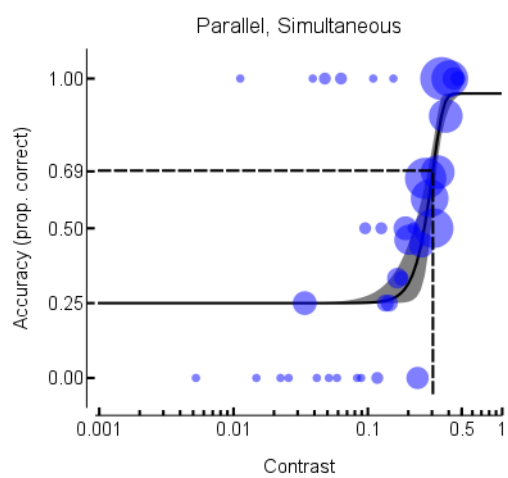

p1033

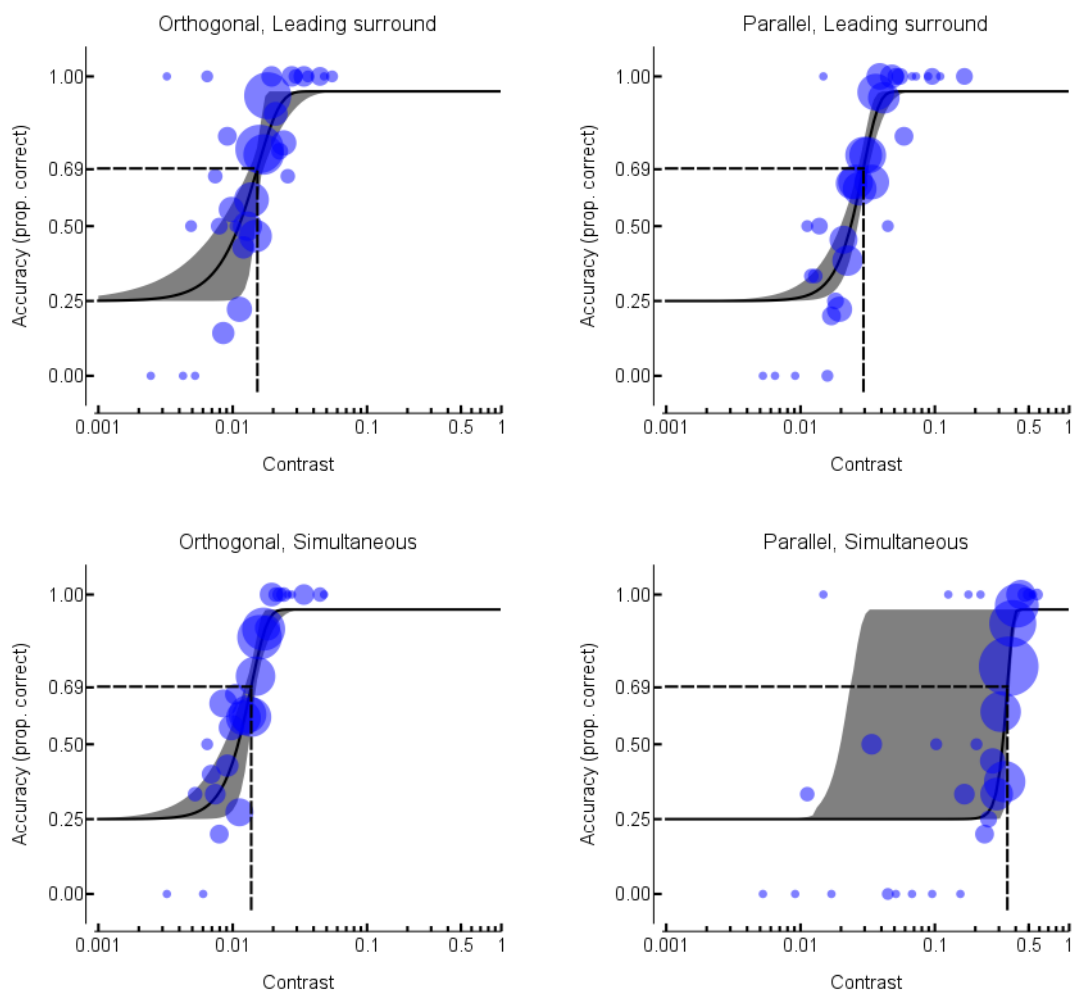

p1034

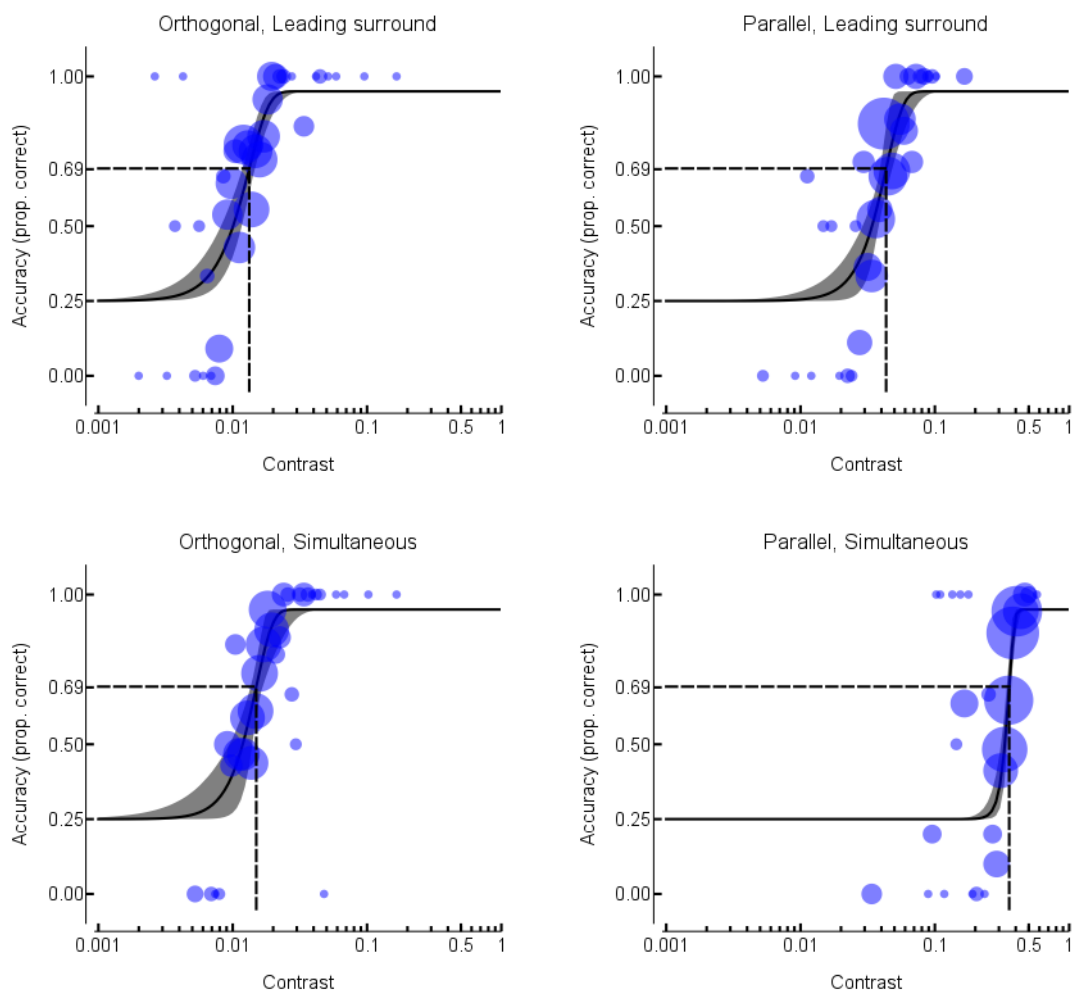

p1035

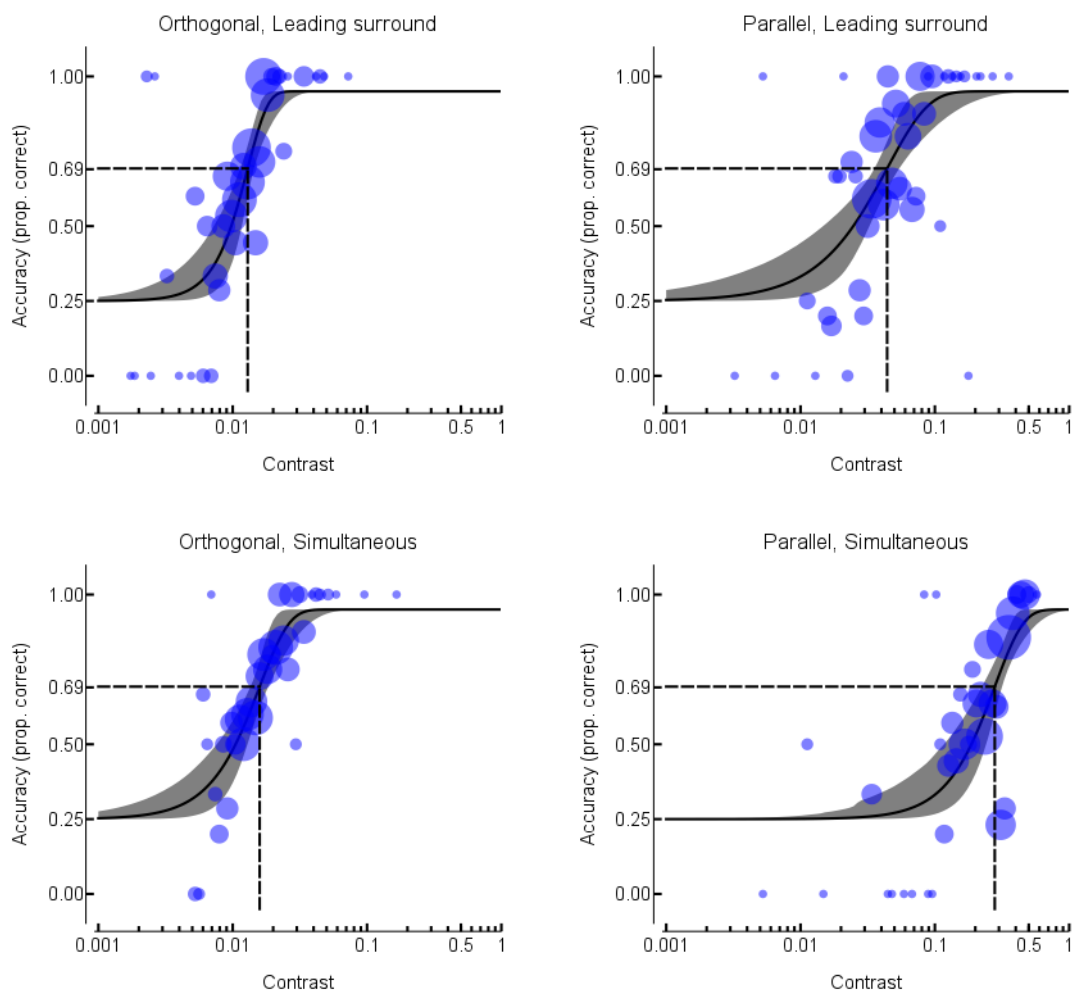



p1036

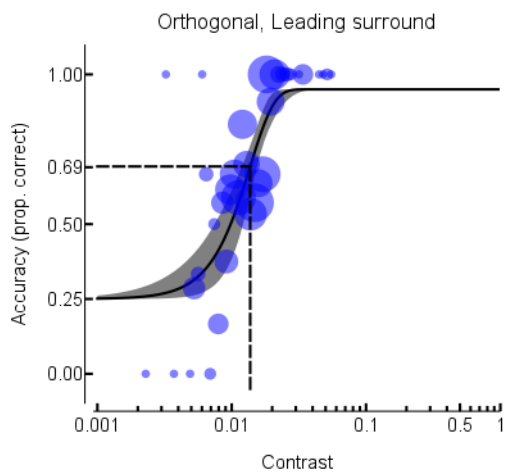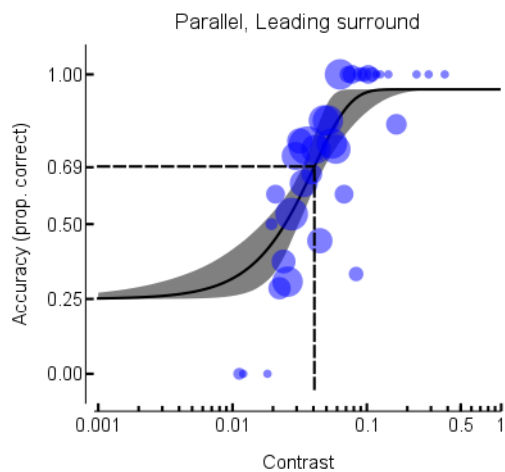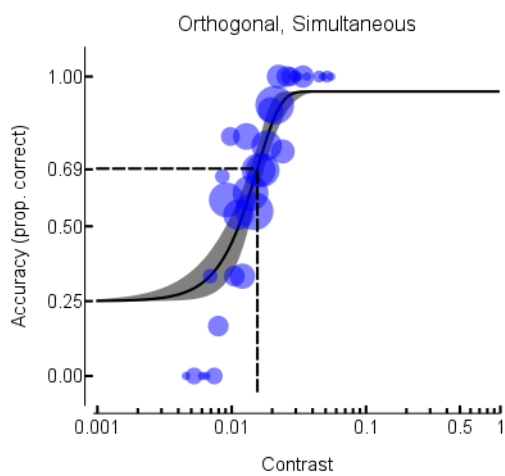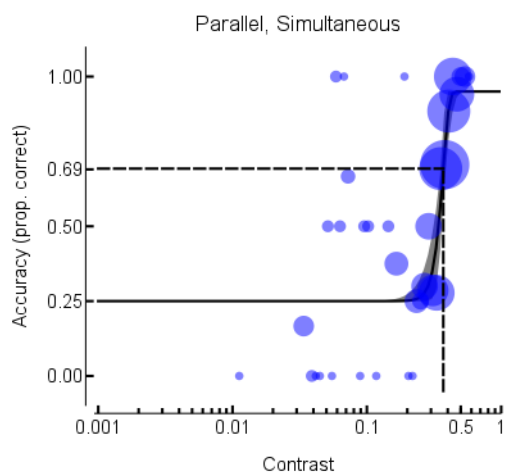

p1037

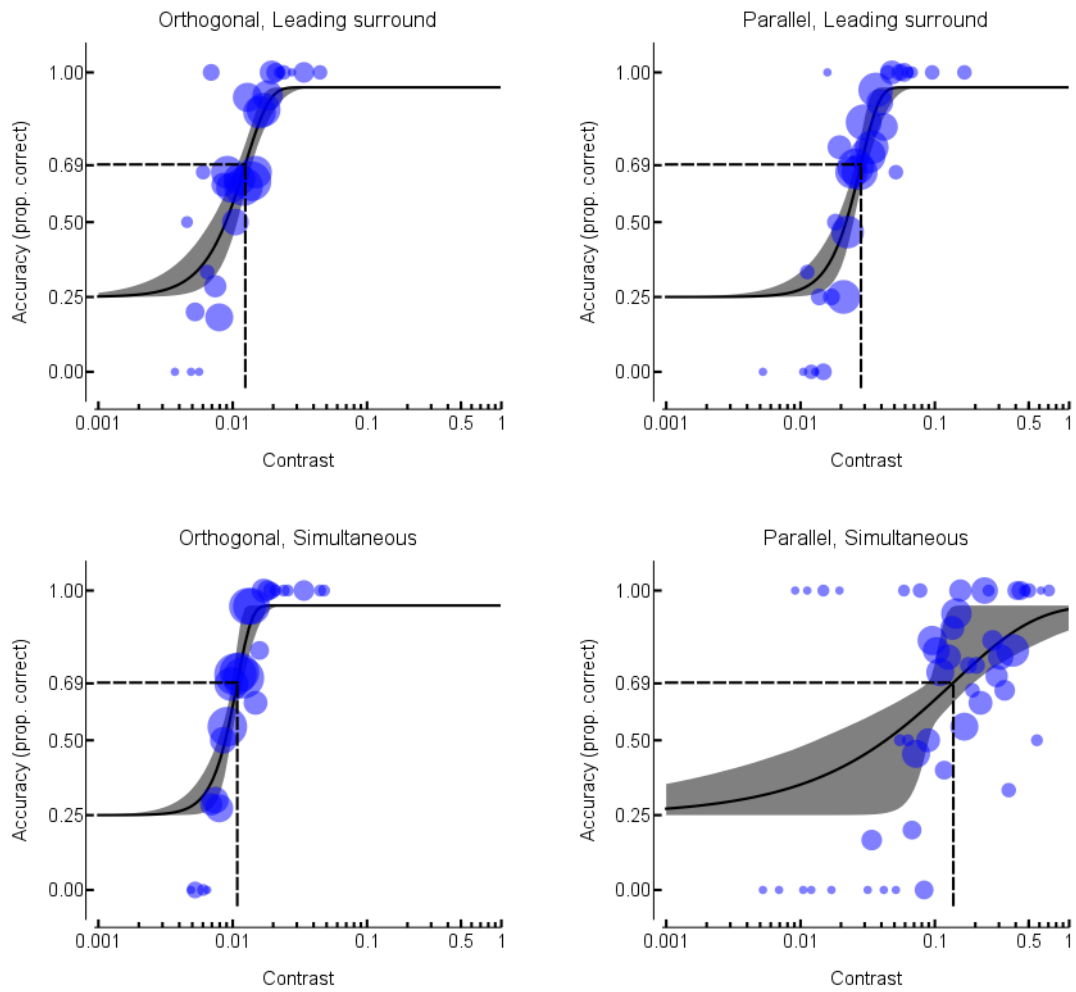

p1038

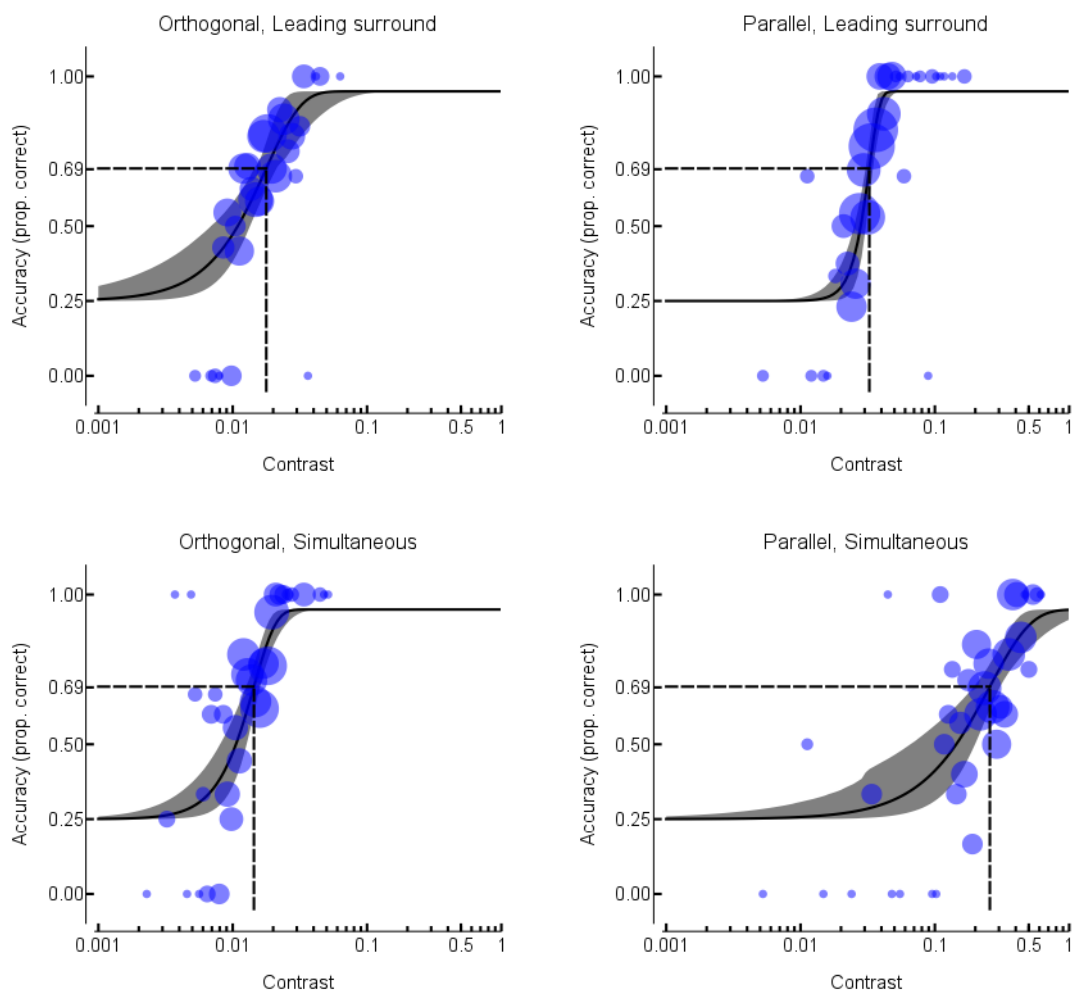

p1039 (excluded)

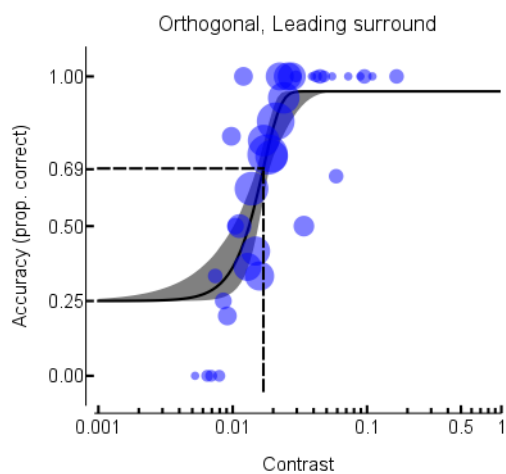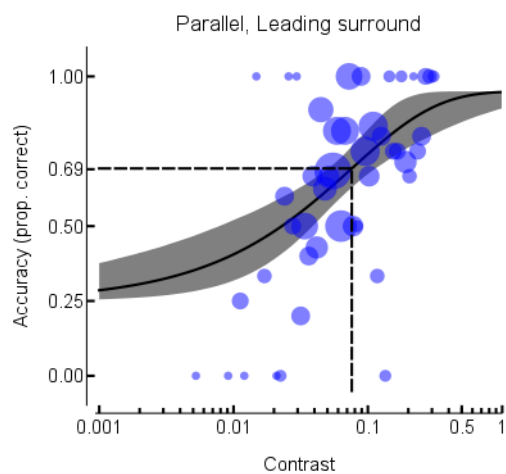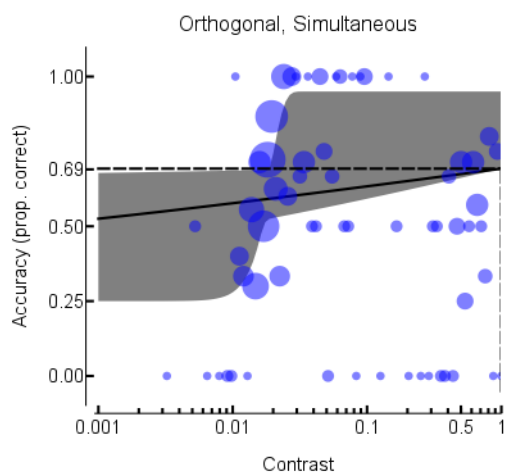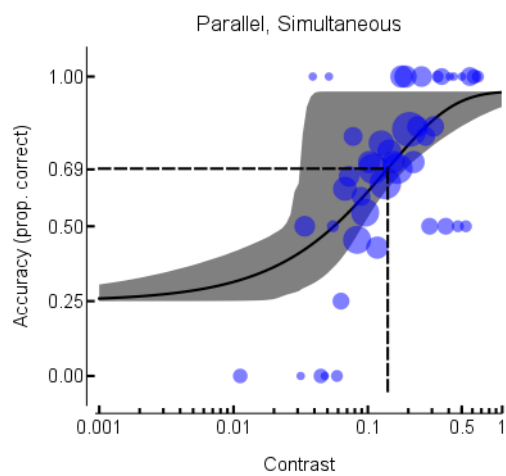

p1041

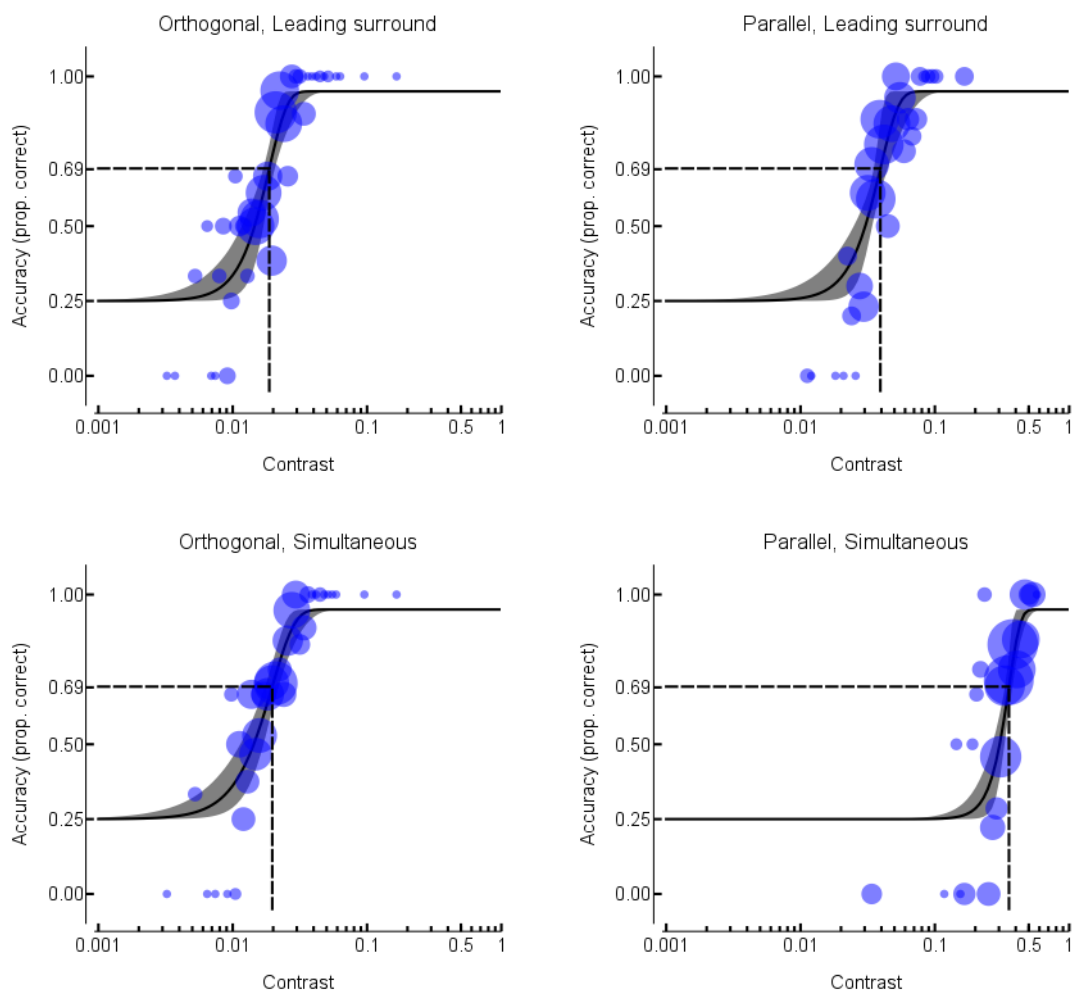

p1042

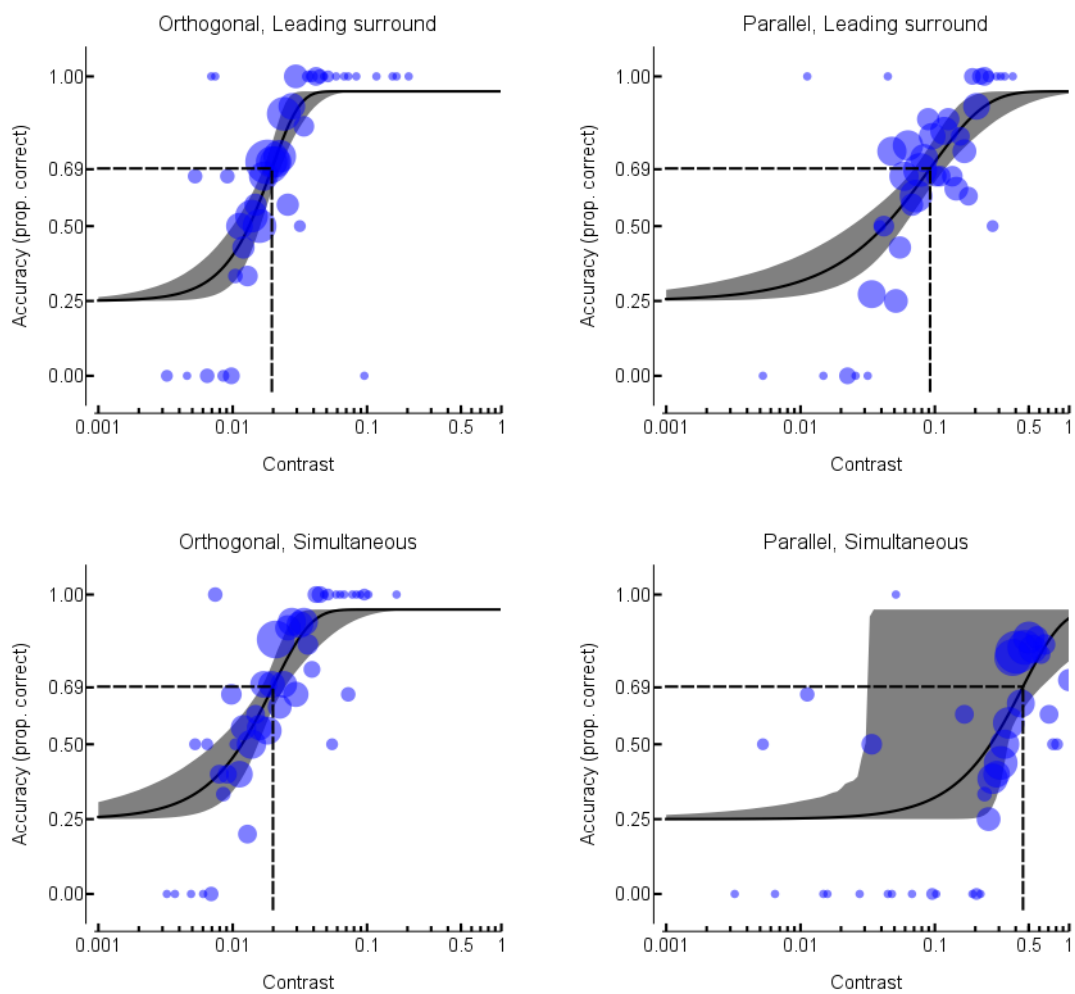

p1043

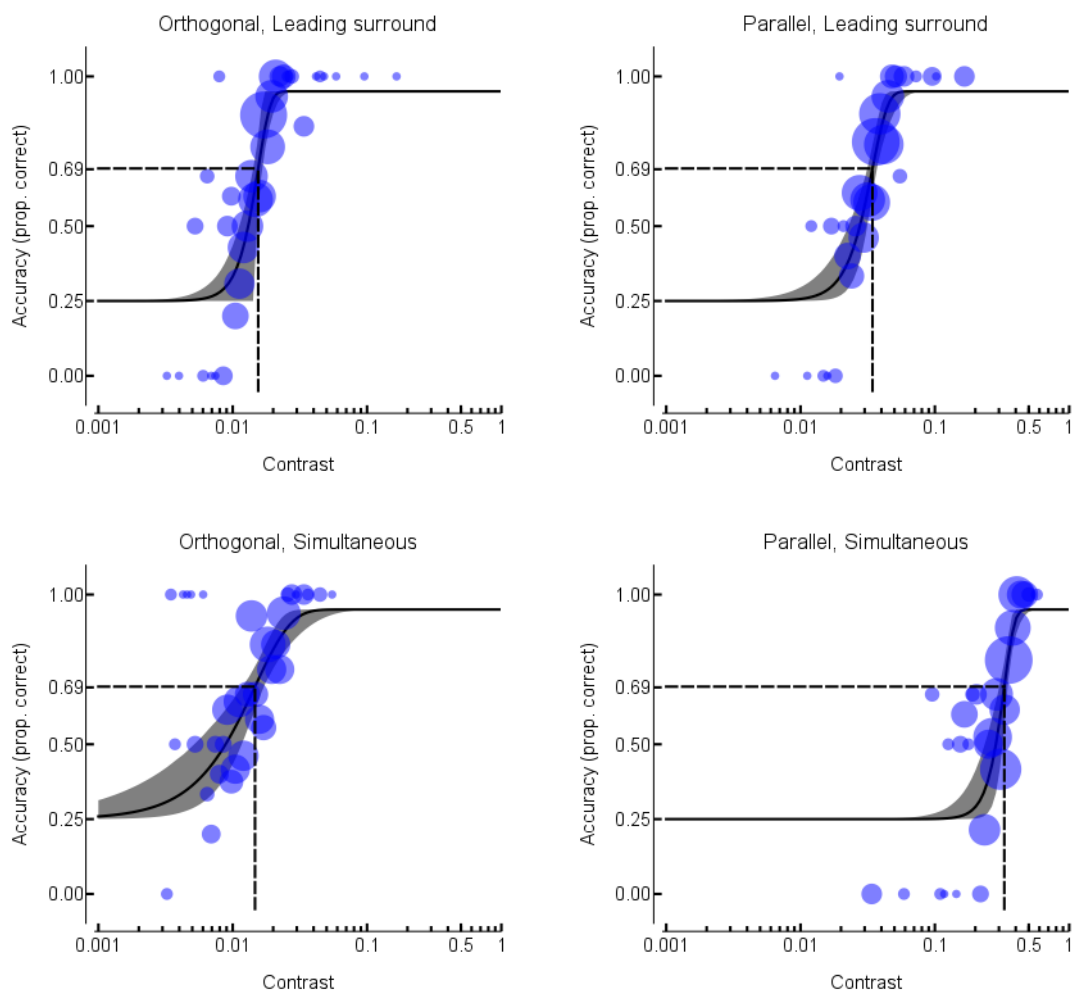

p1044

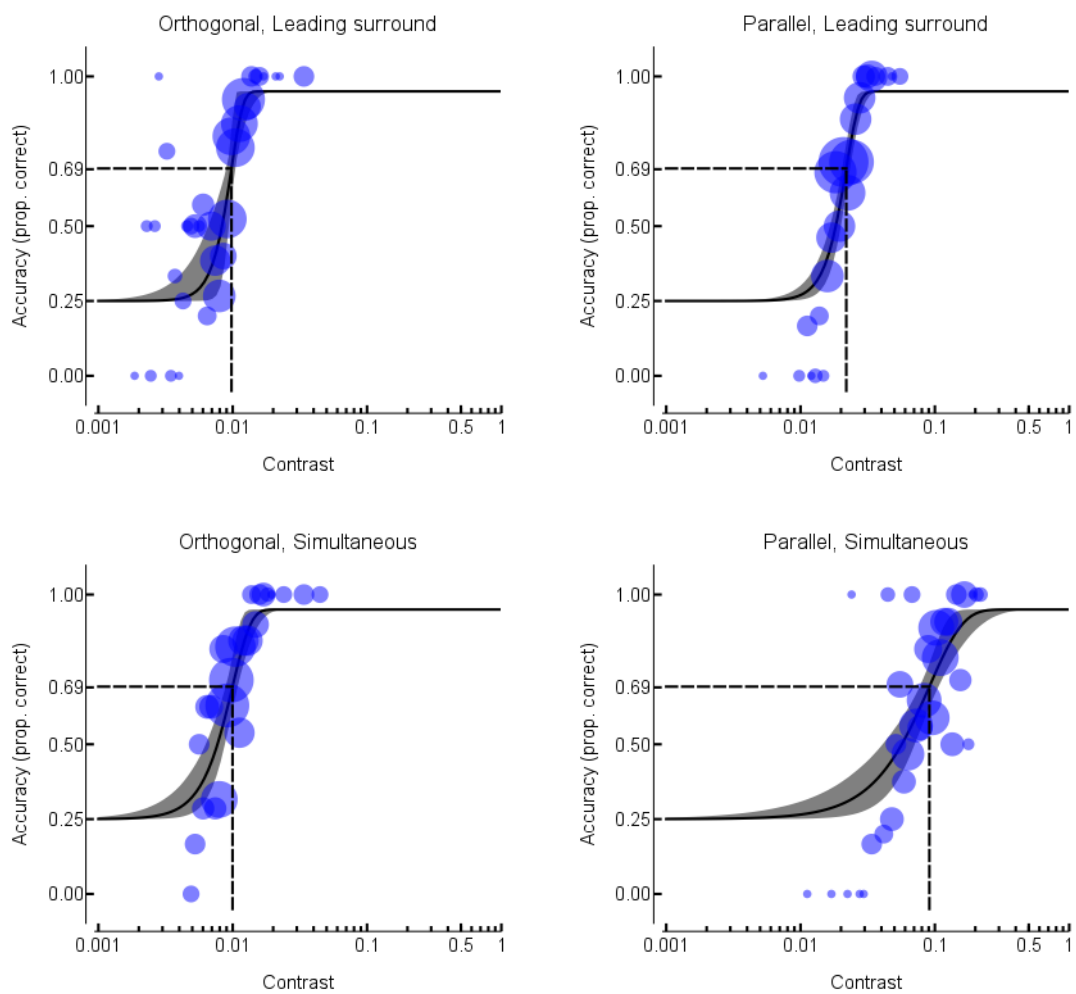



p1045

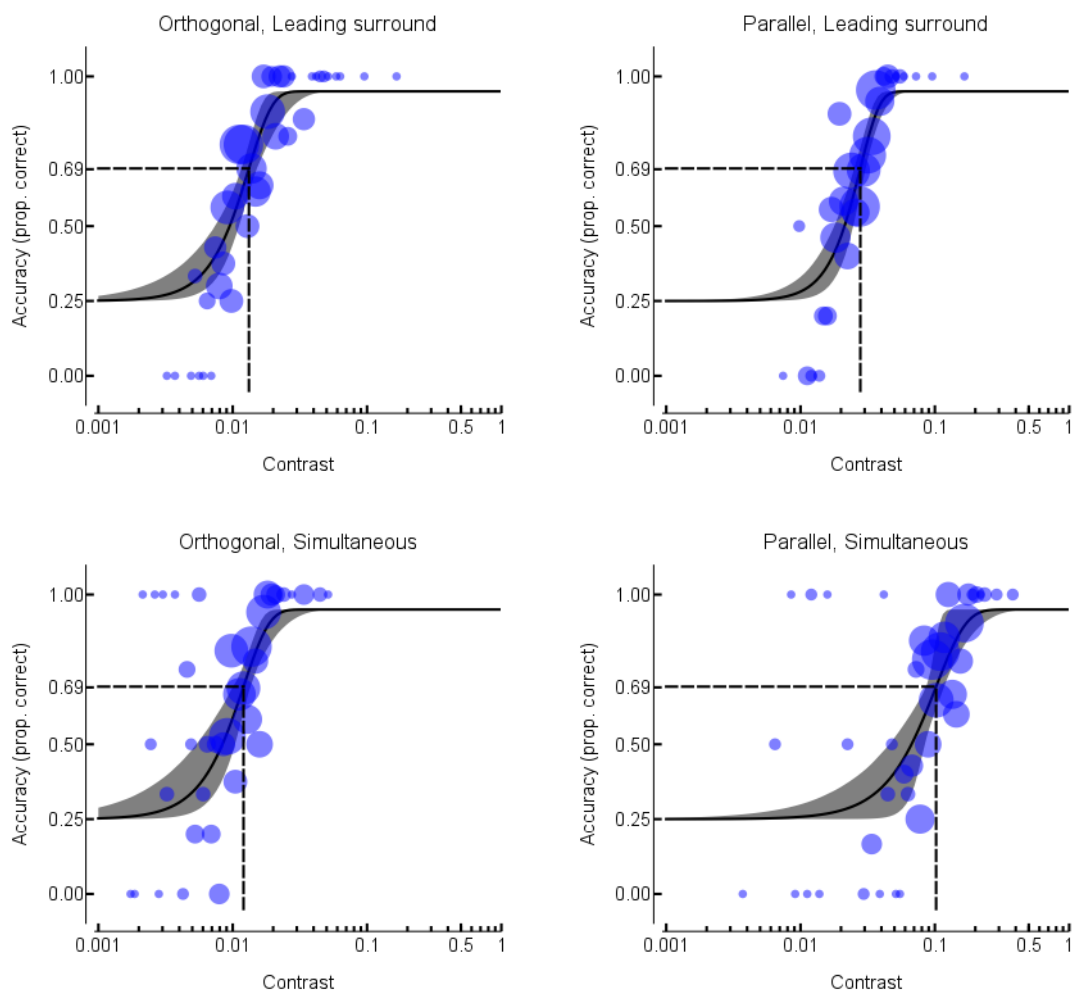

p1046

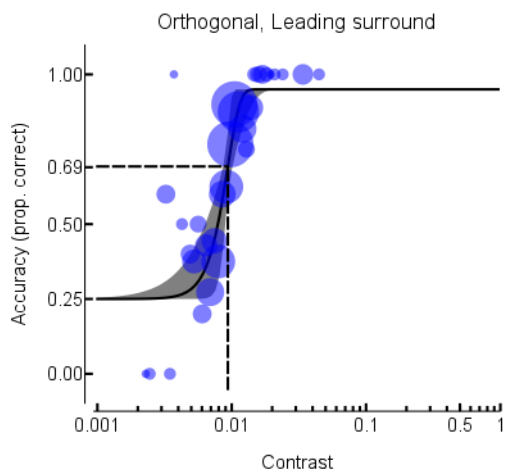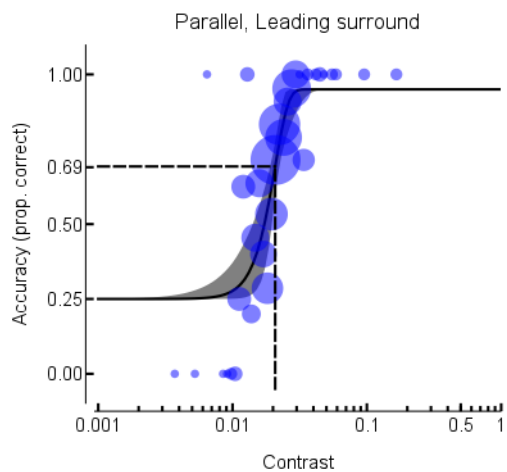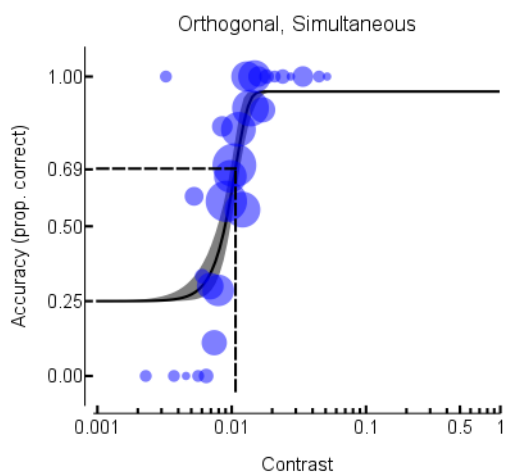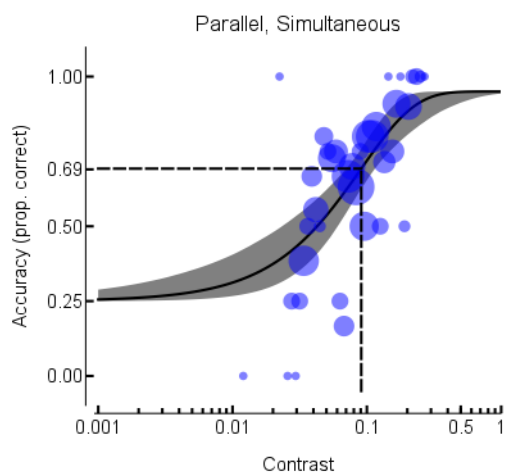

p1047

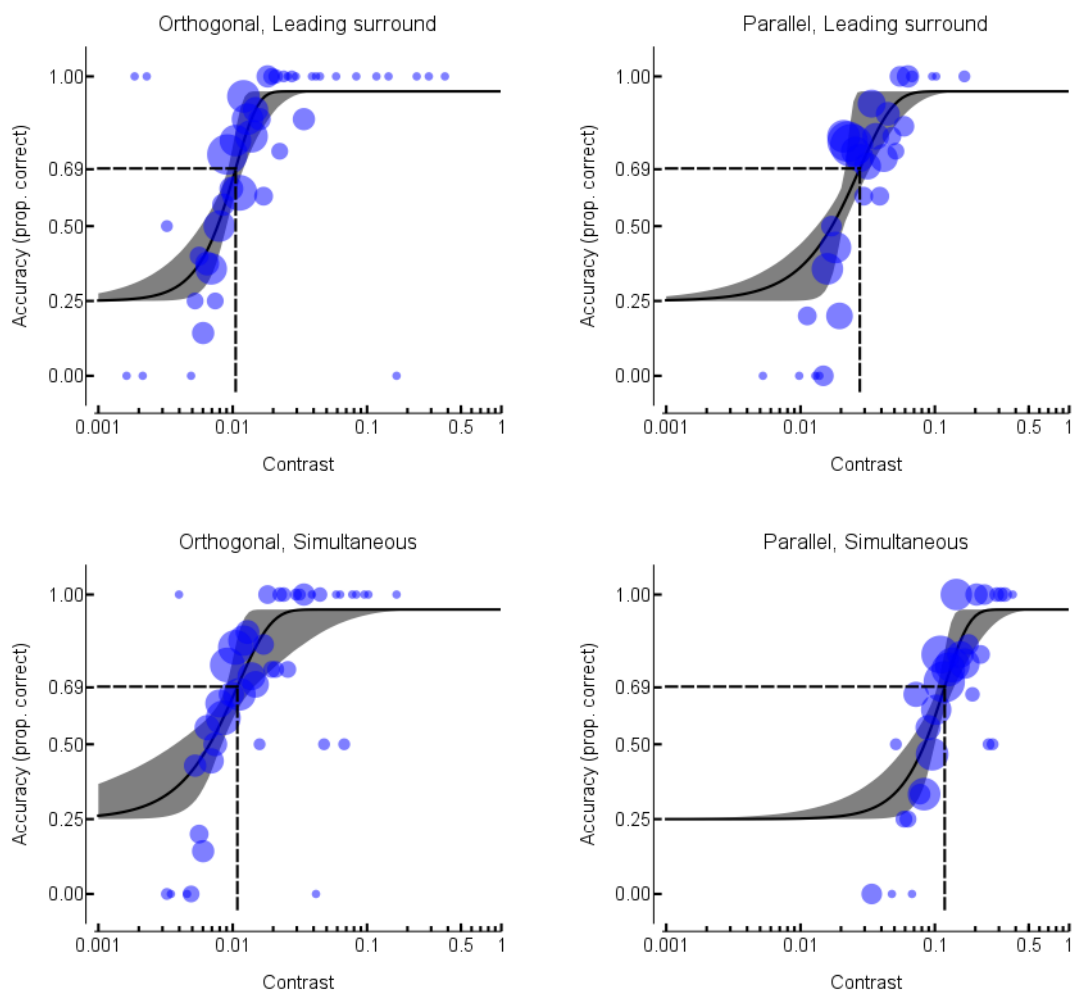

p1048 (excluded)

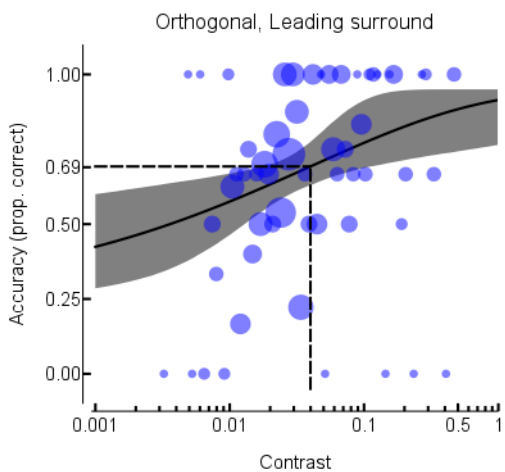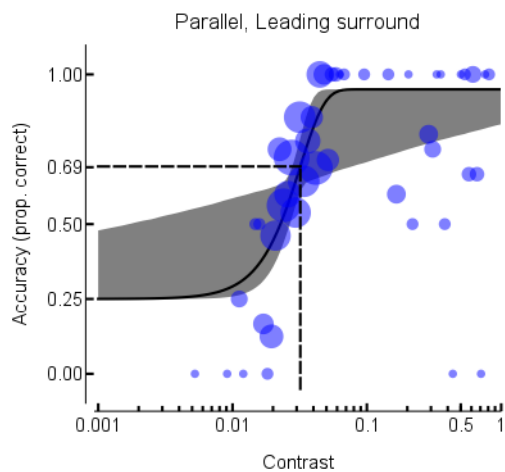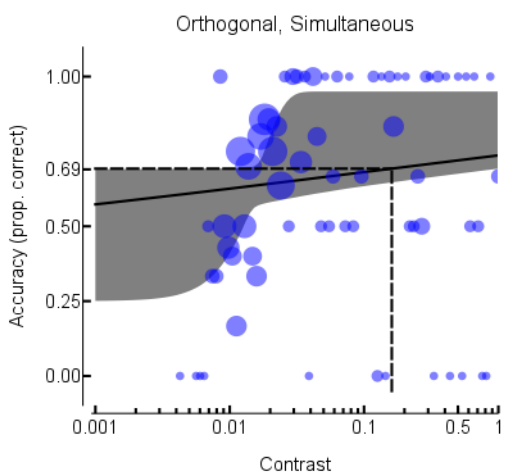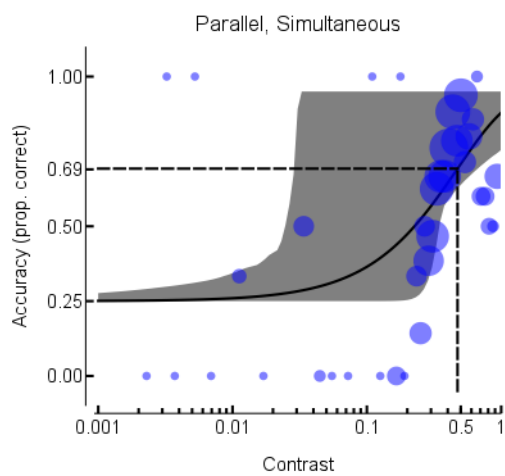

p1049

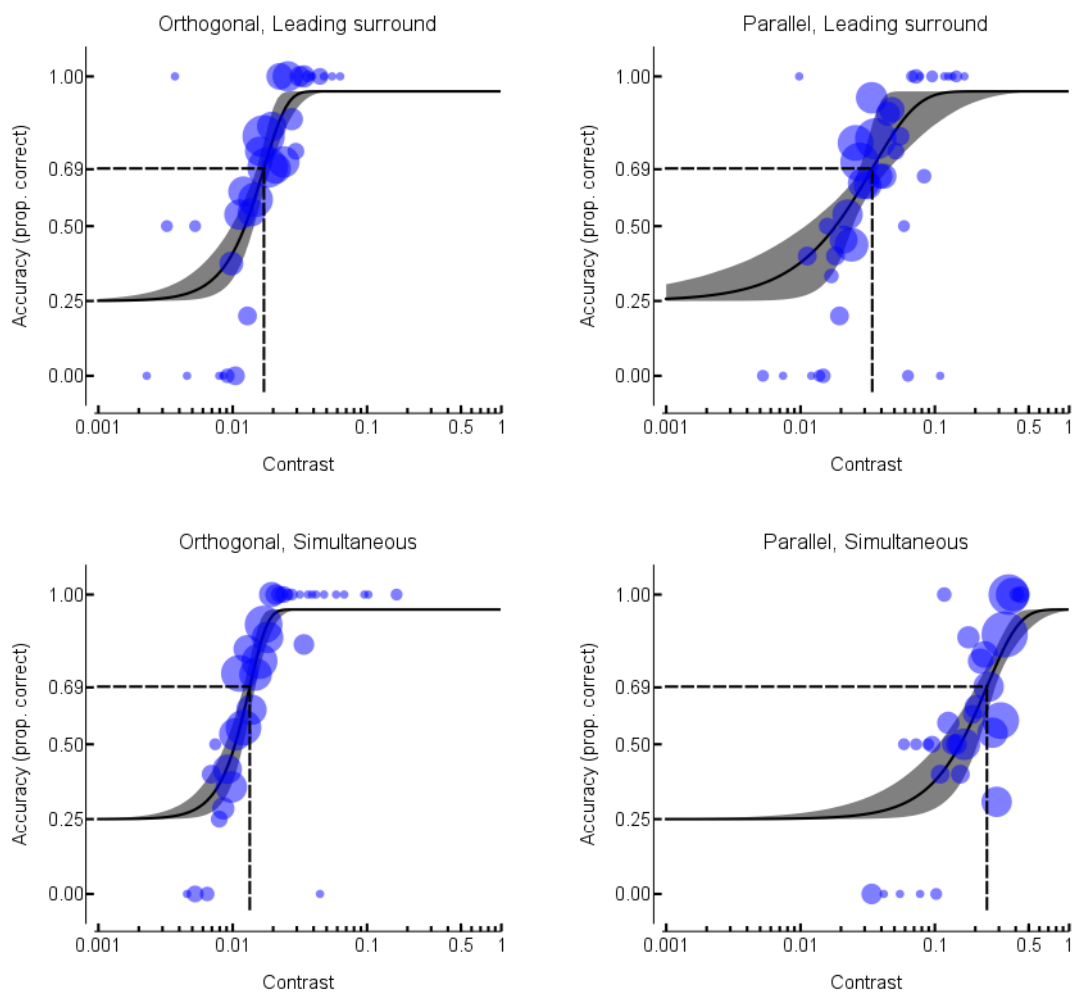

p1050

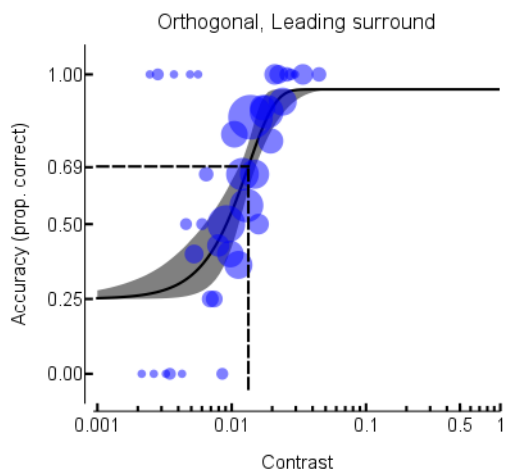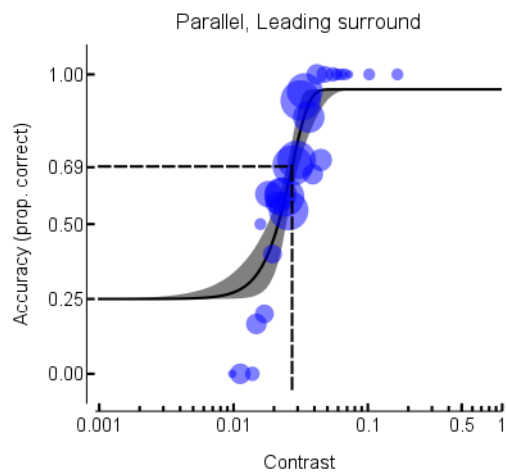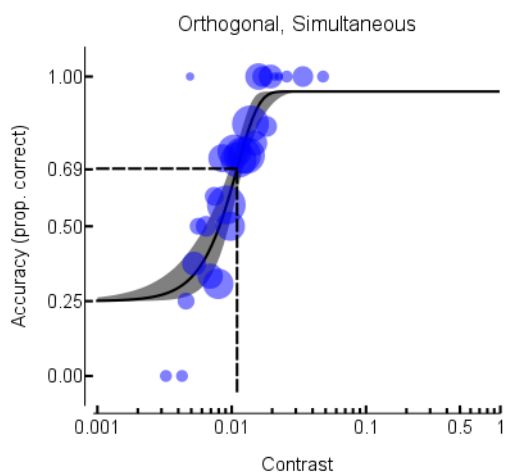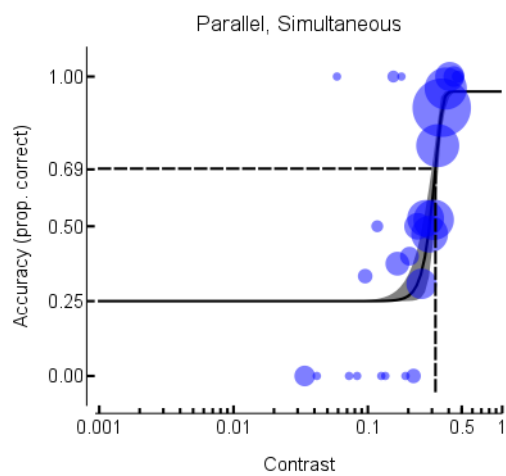

p1051 (excluded)

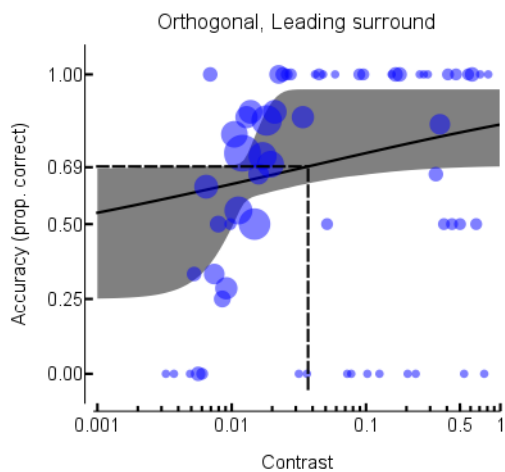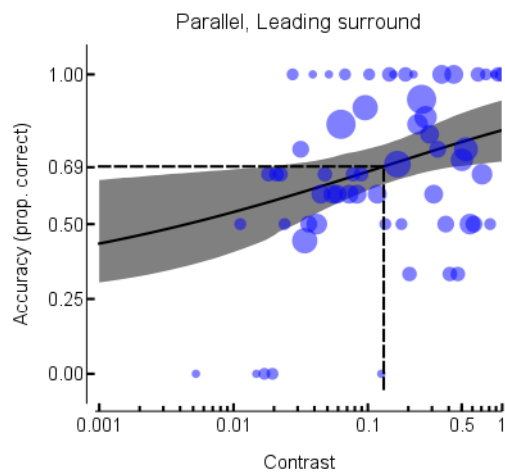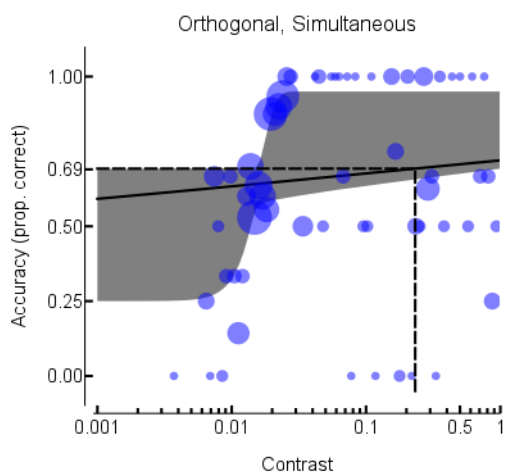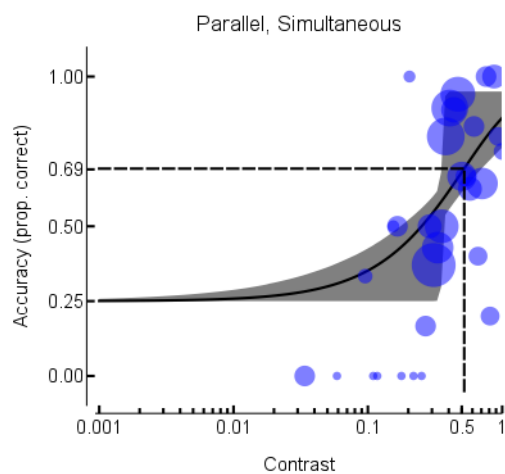

p1052

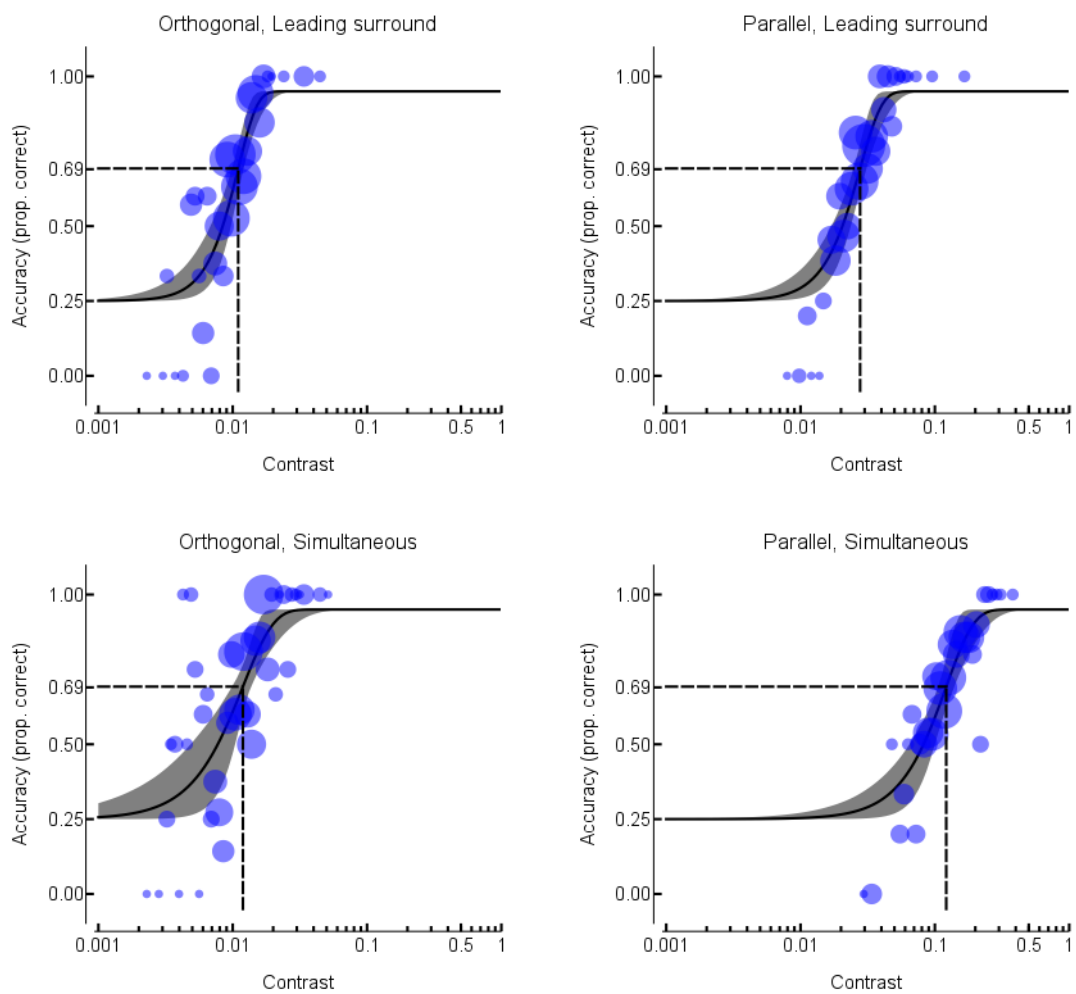



p1053

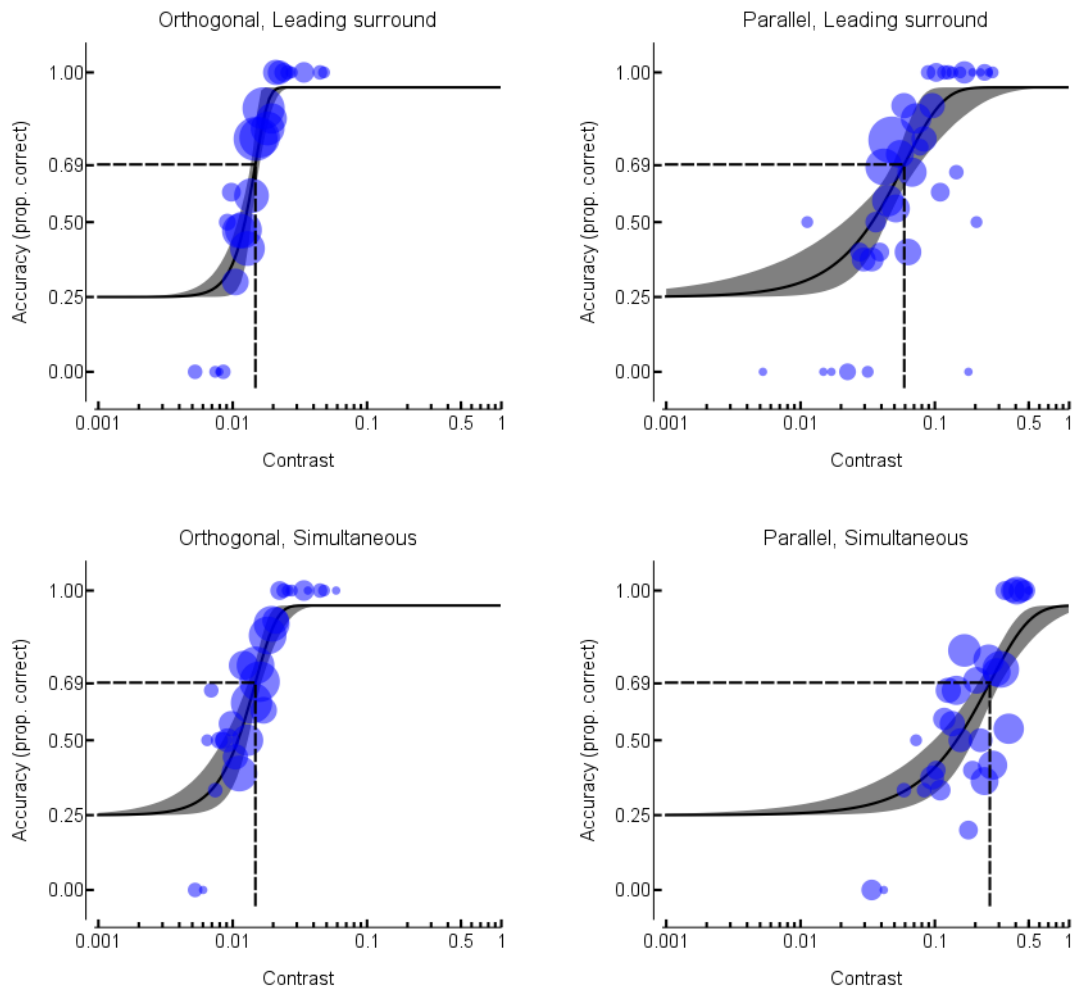

p1054

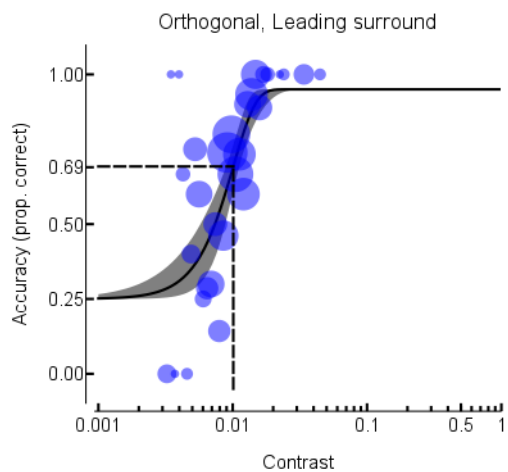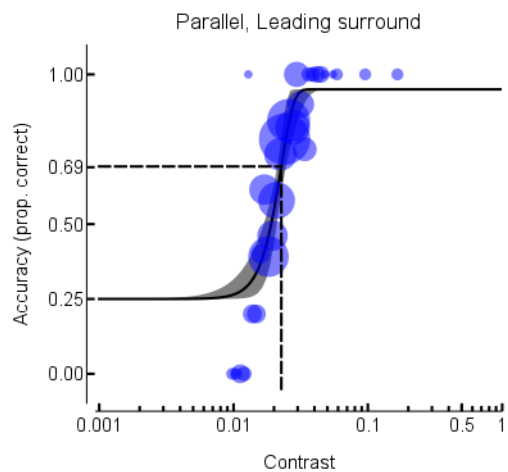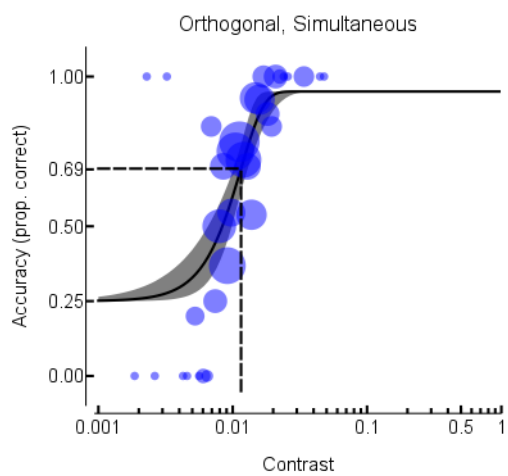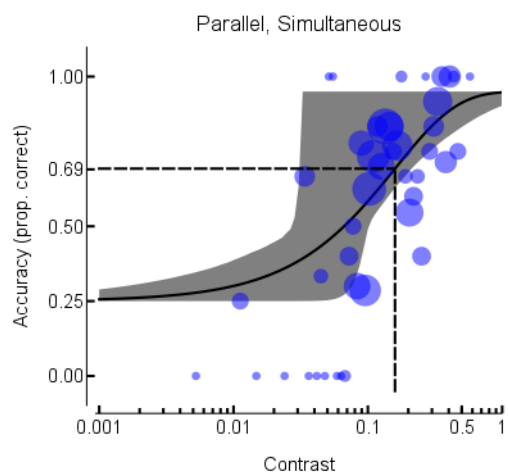

p1055

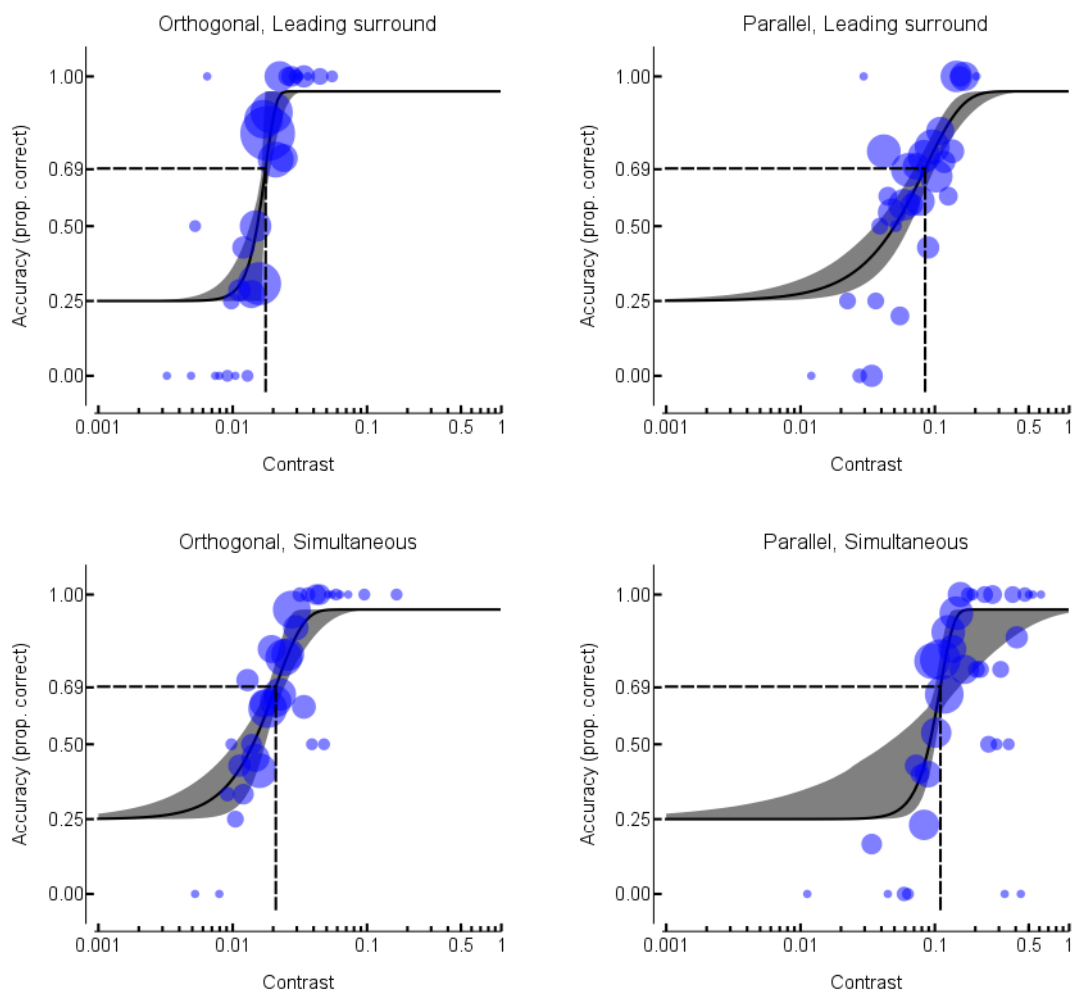

p1056

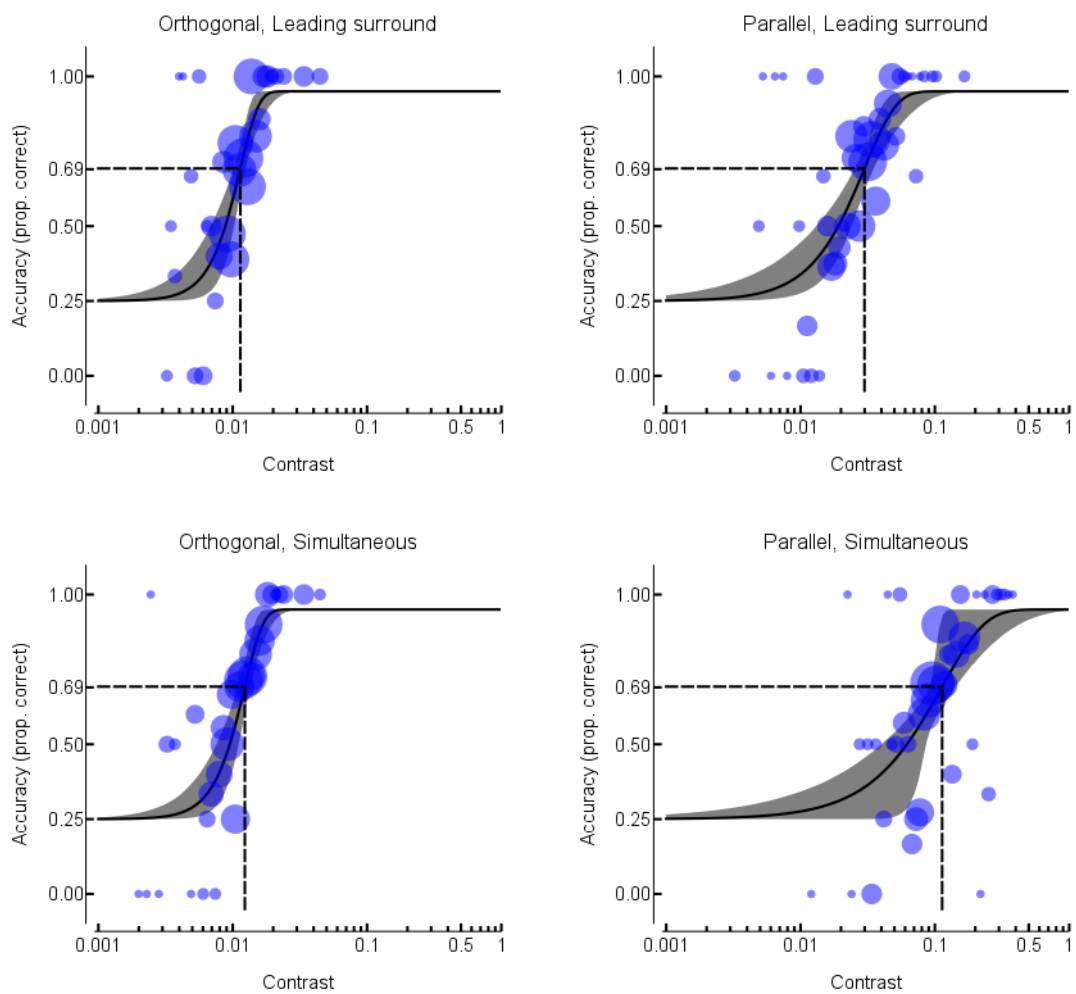

p1057

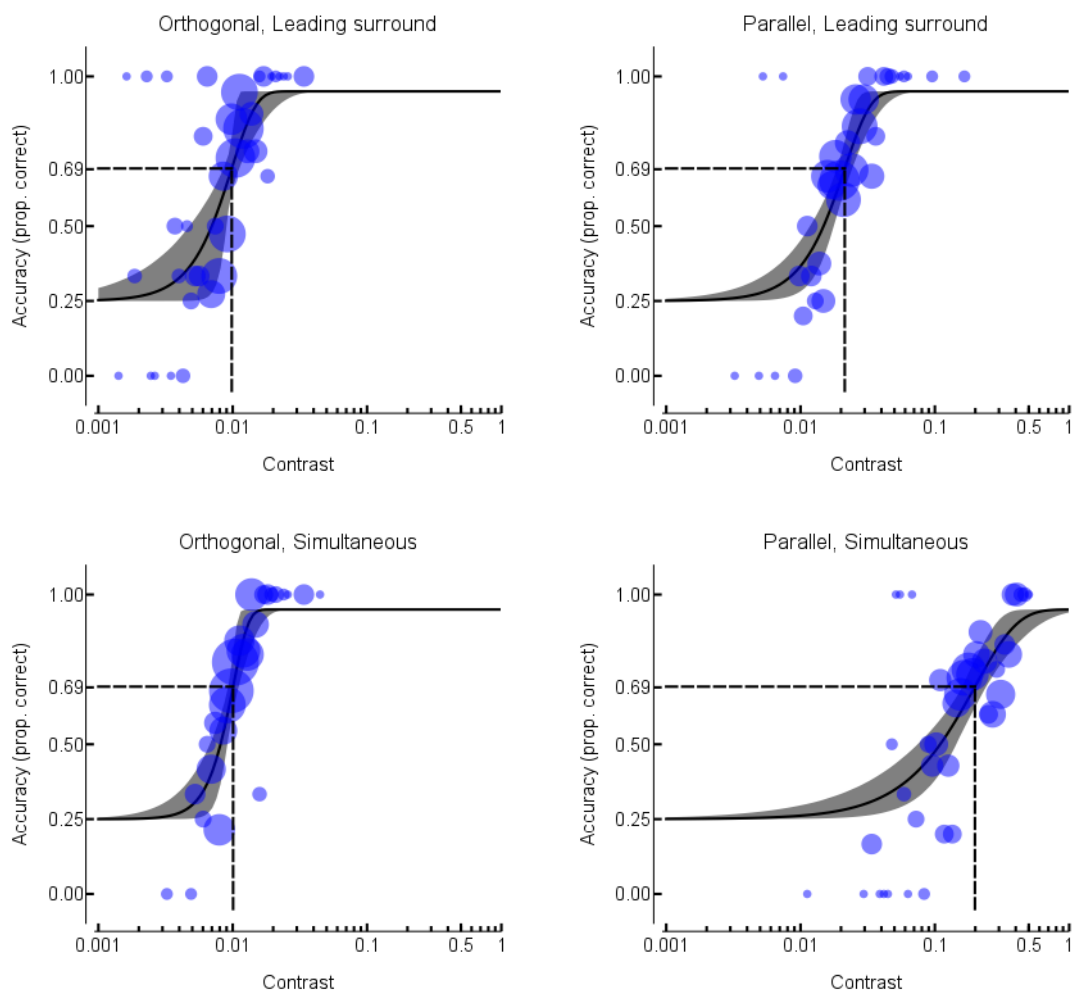

p1058

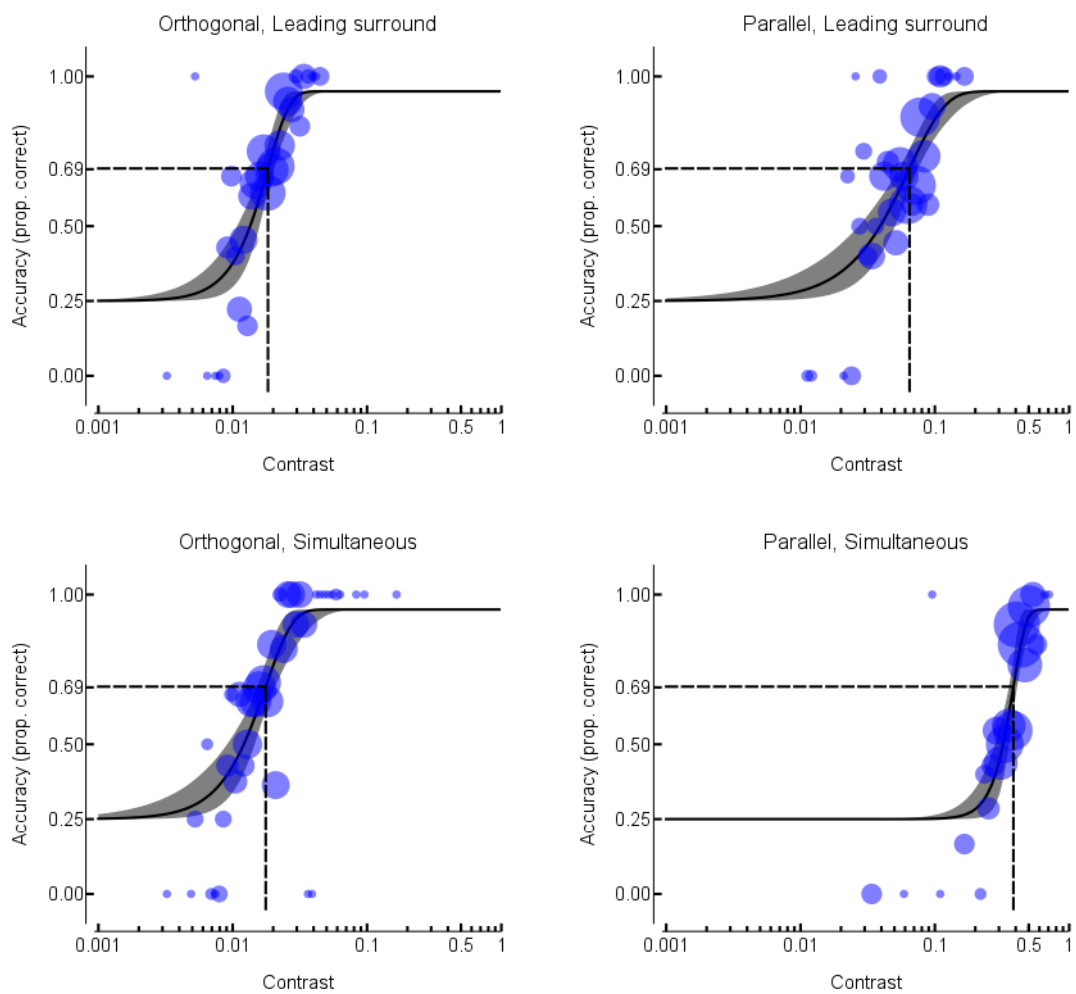

p1059

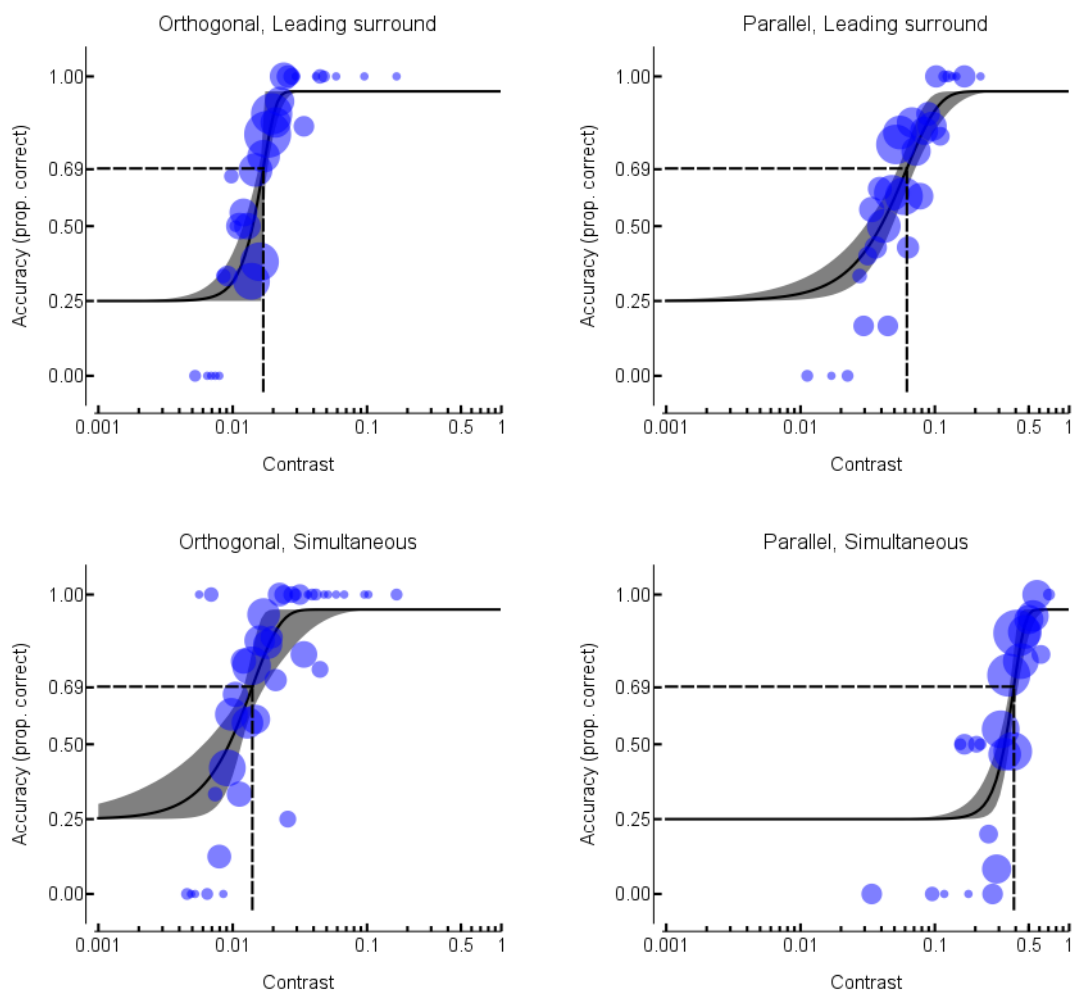

p1060 (excluded)

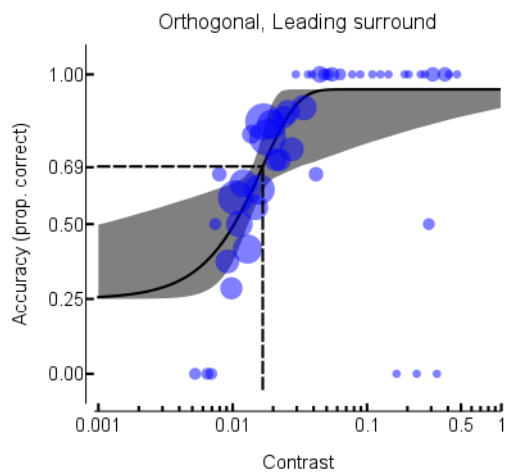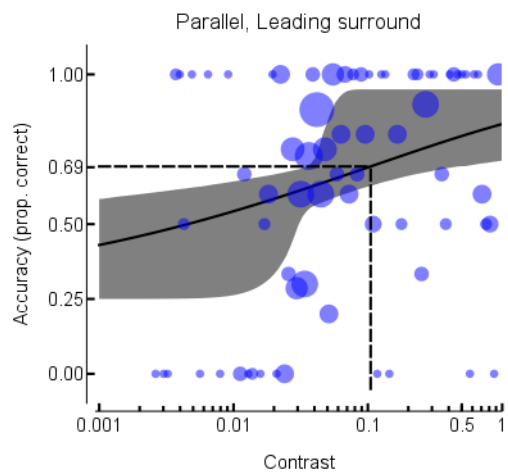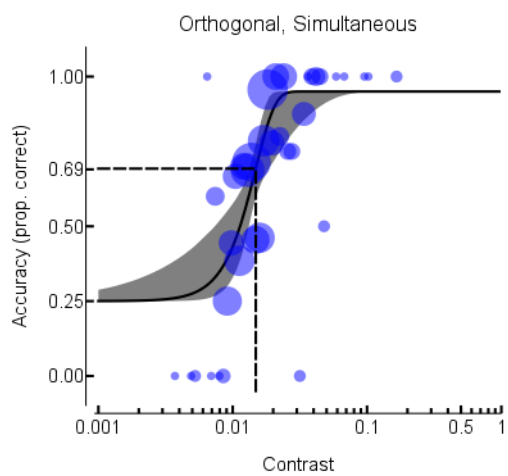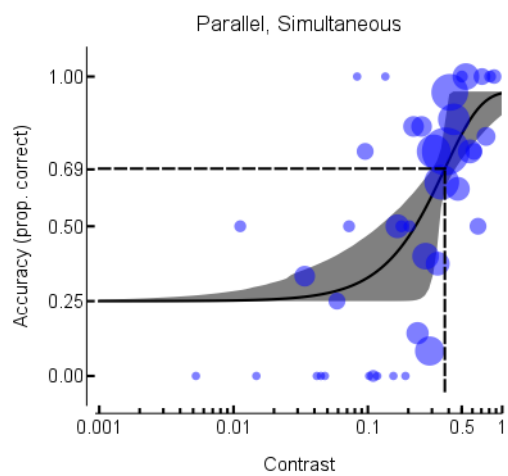



p1061

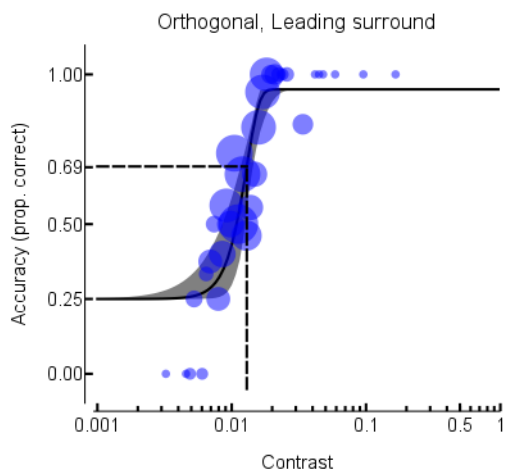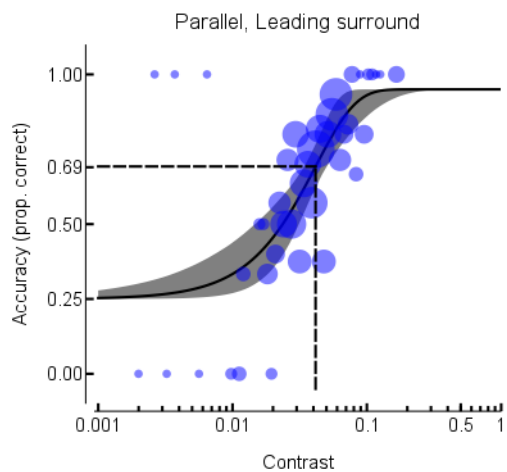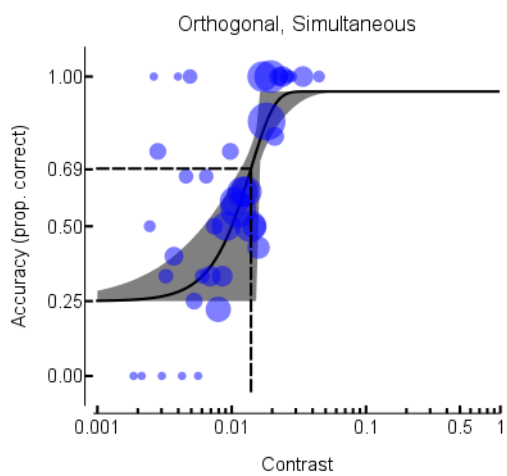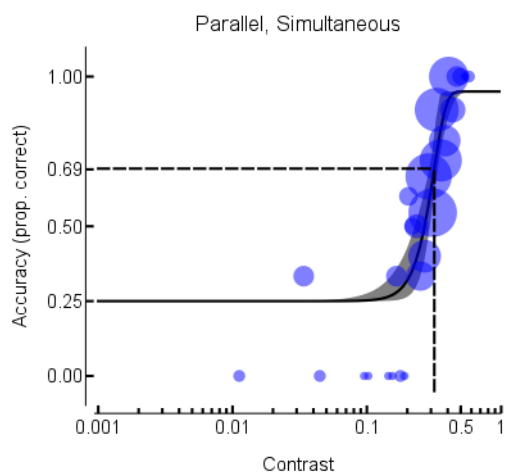

p1062

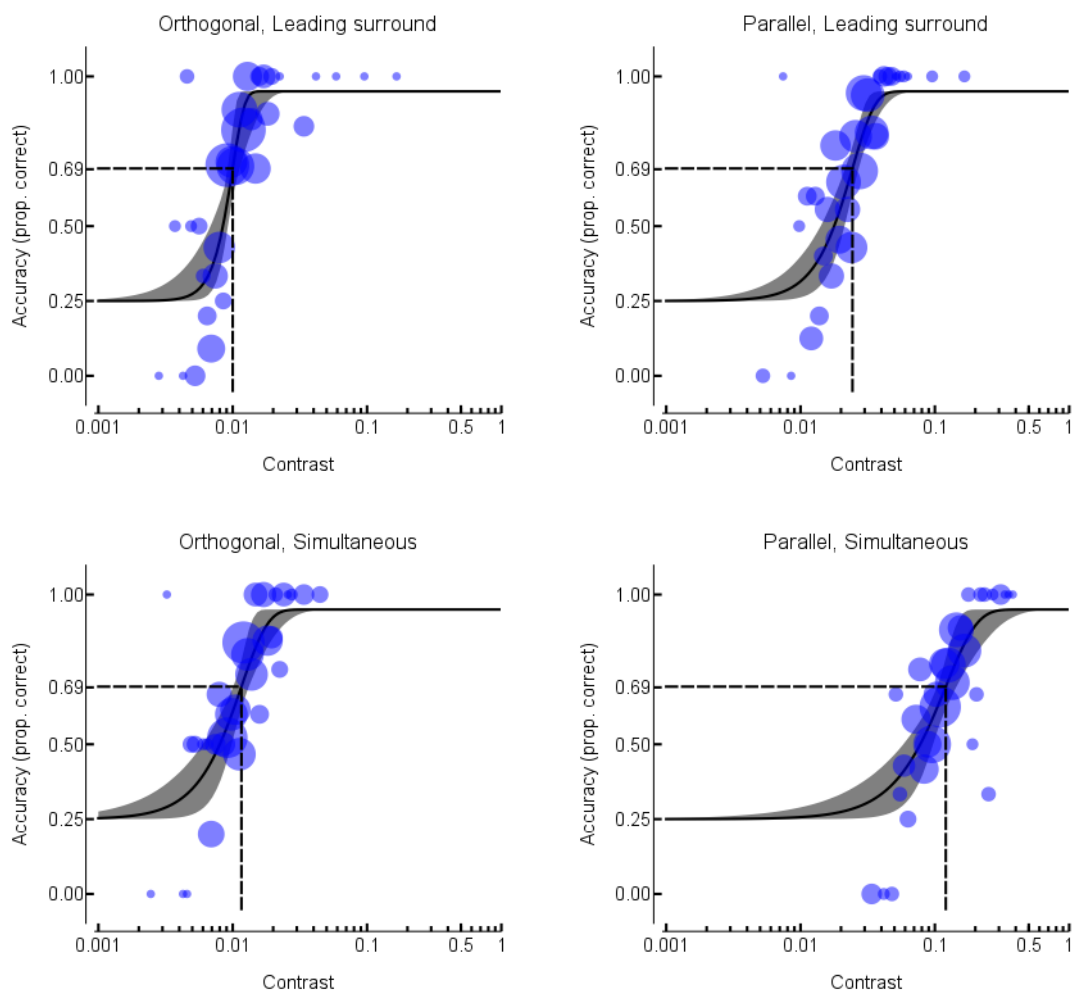

p1063

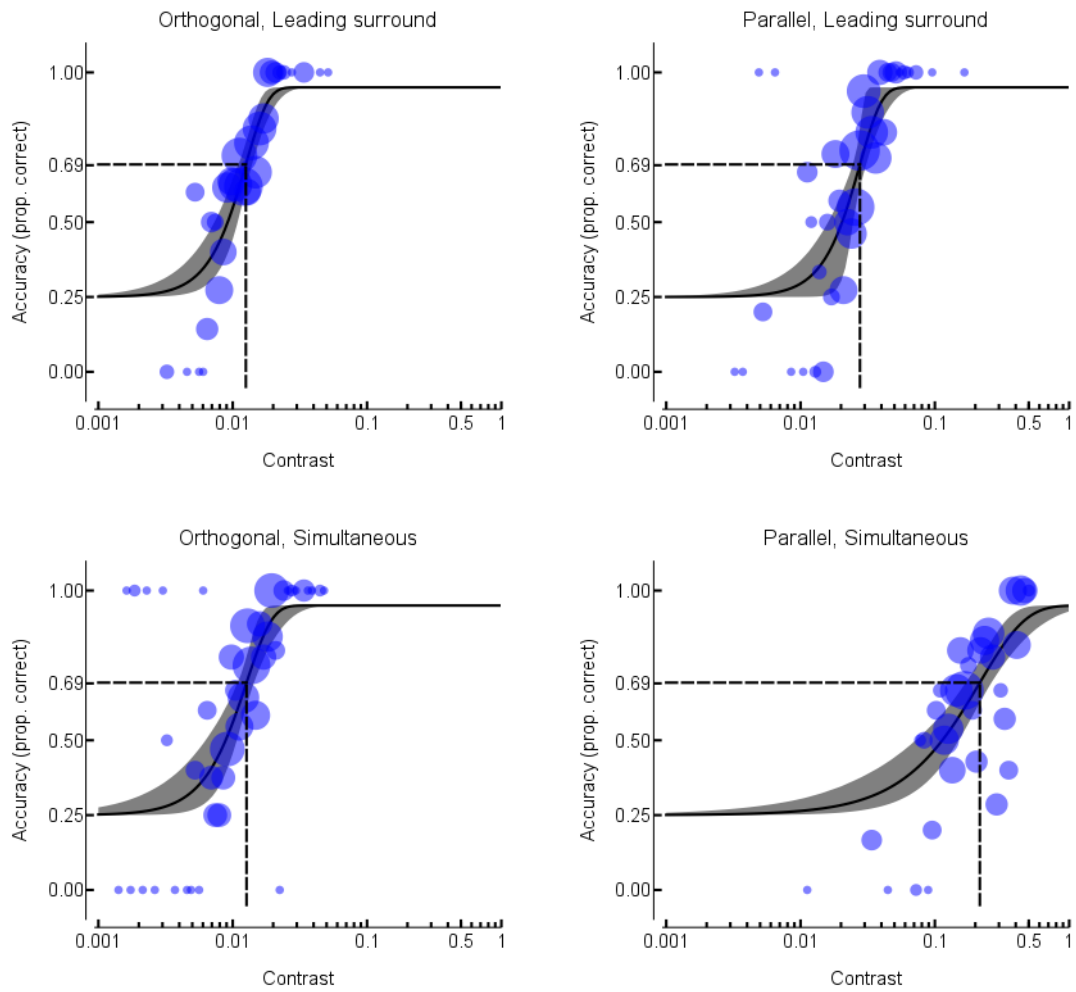

p1064

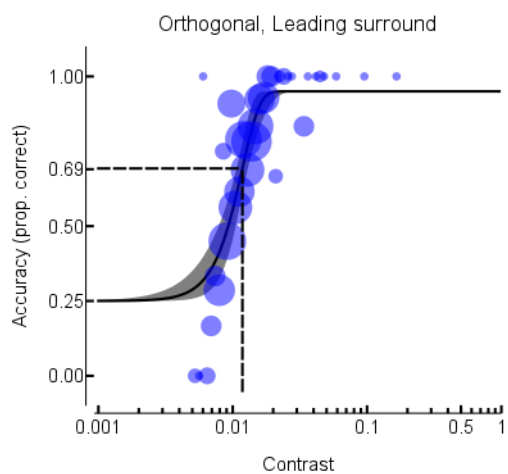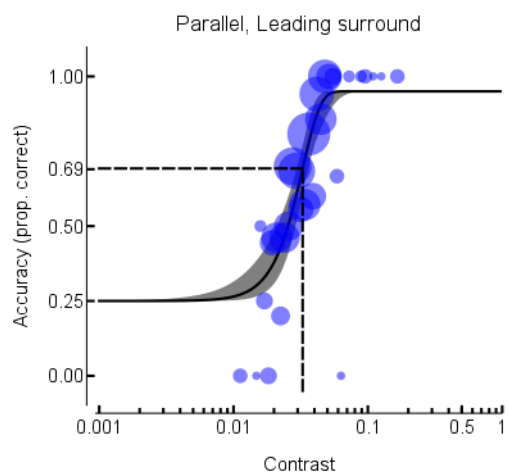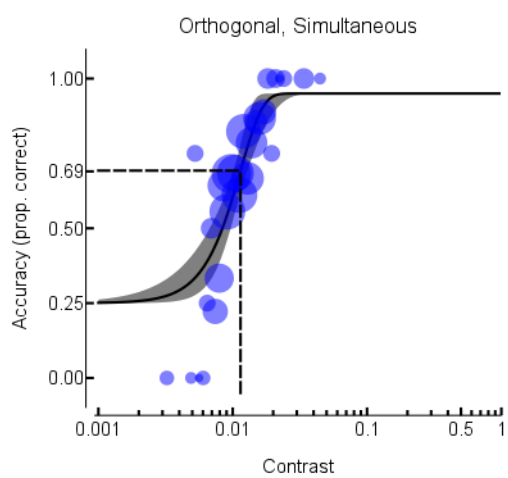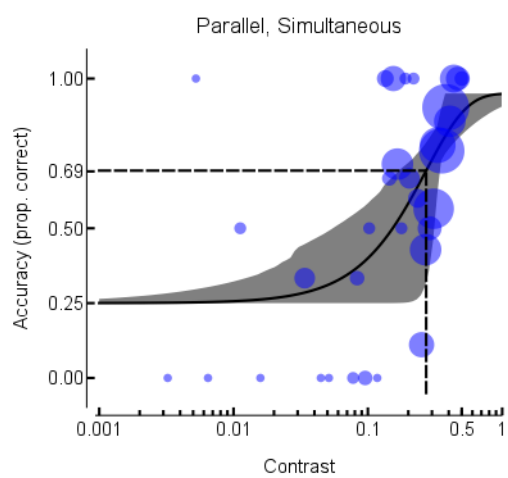

p1065

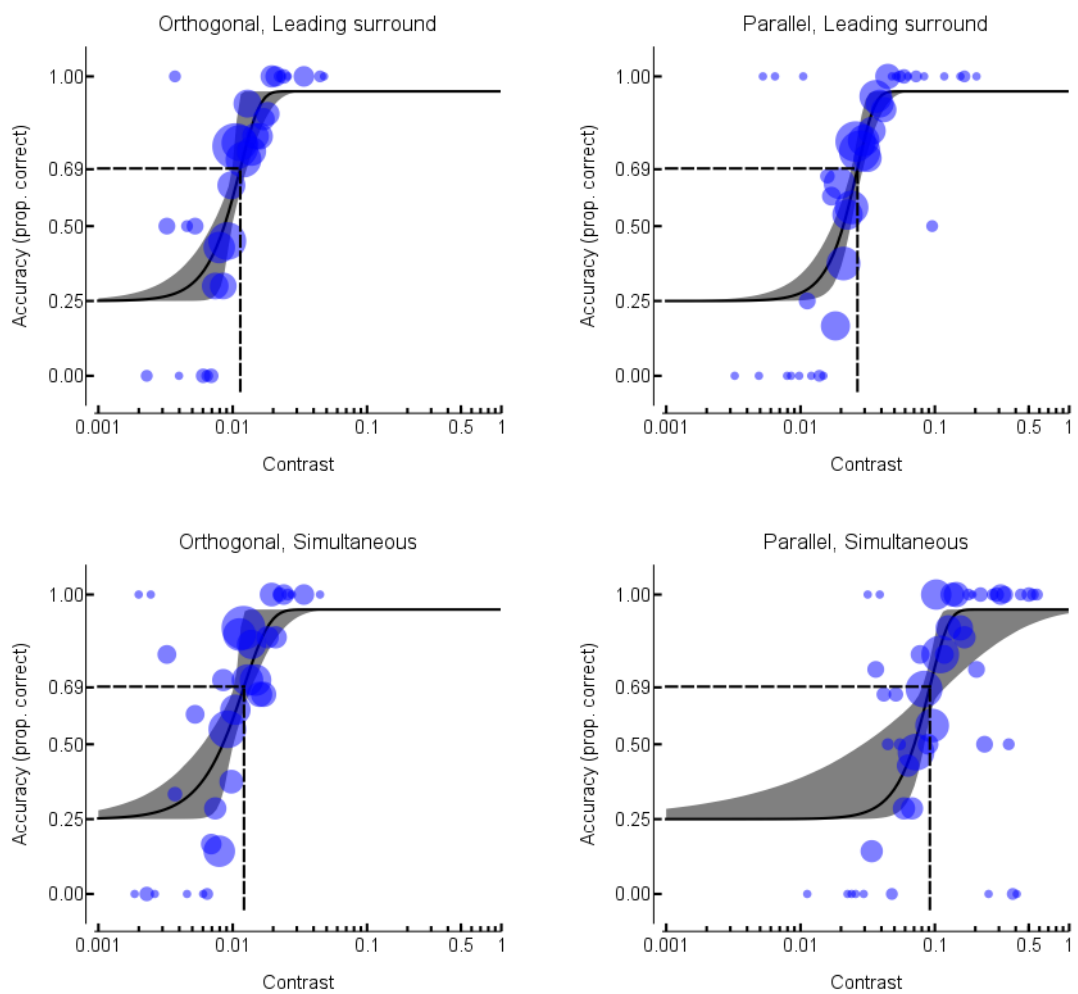

p1066

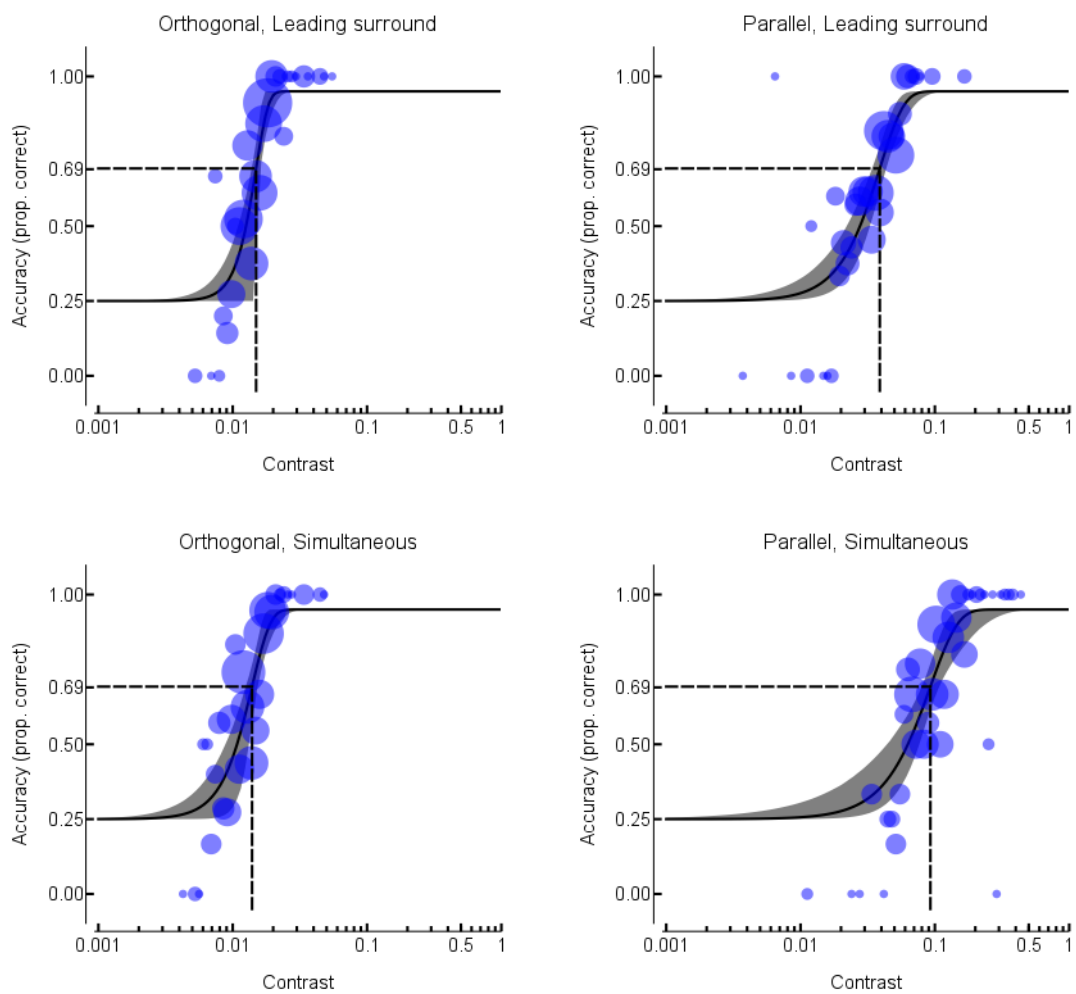

p1067

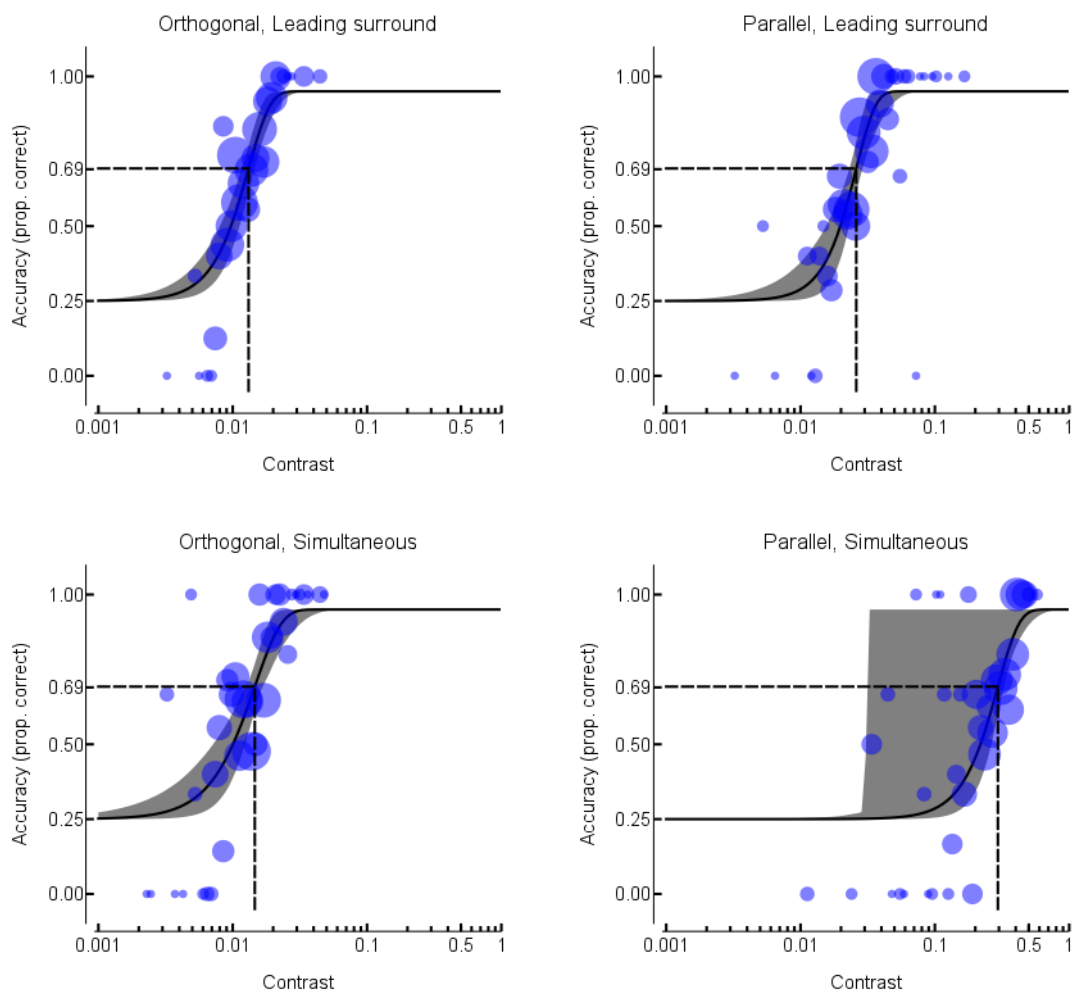

p1068

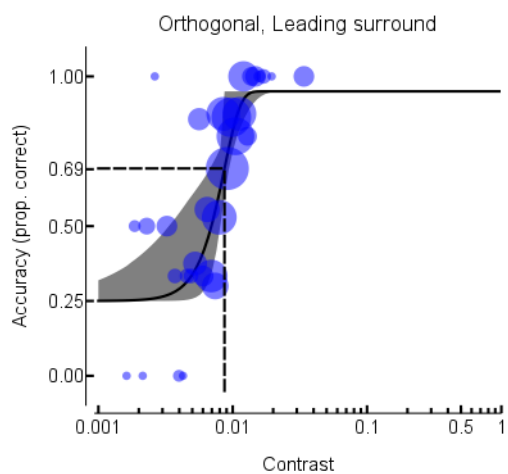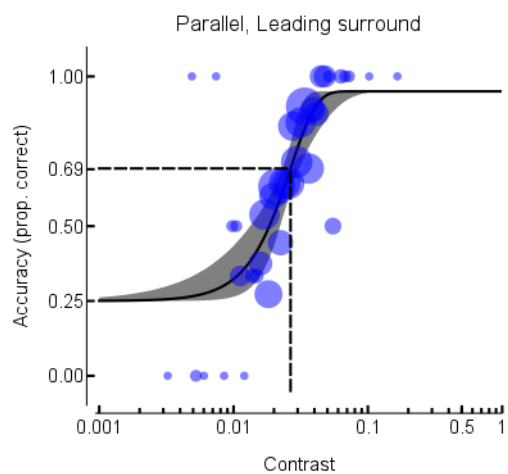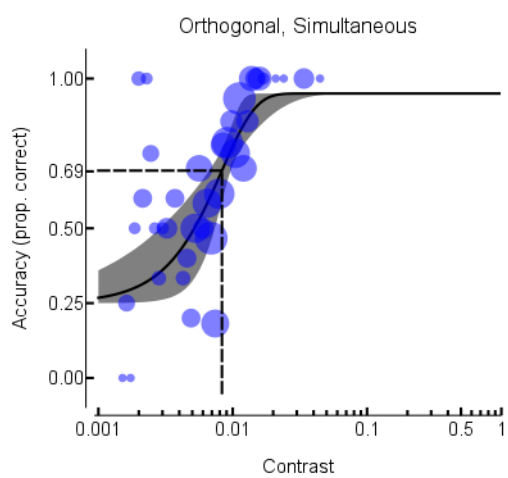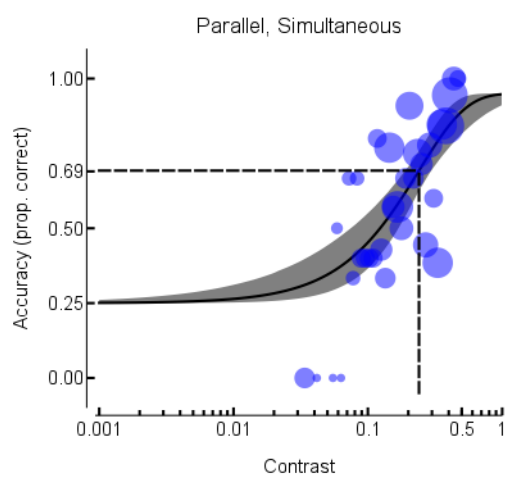



p1069

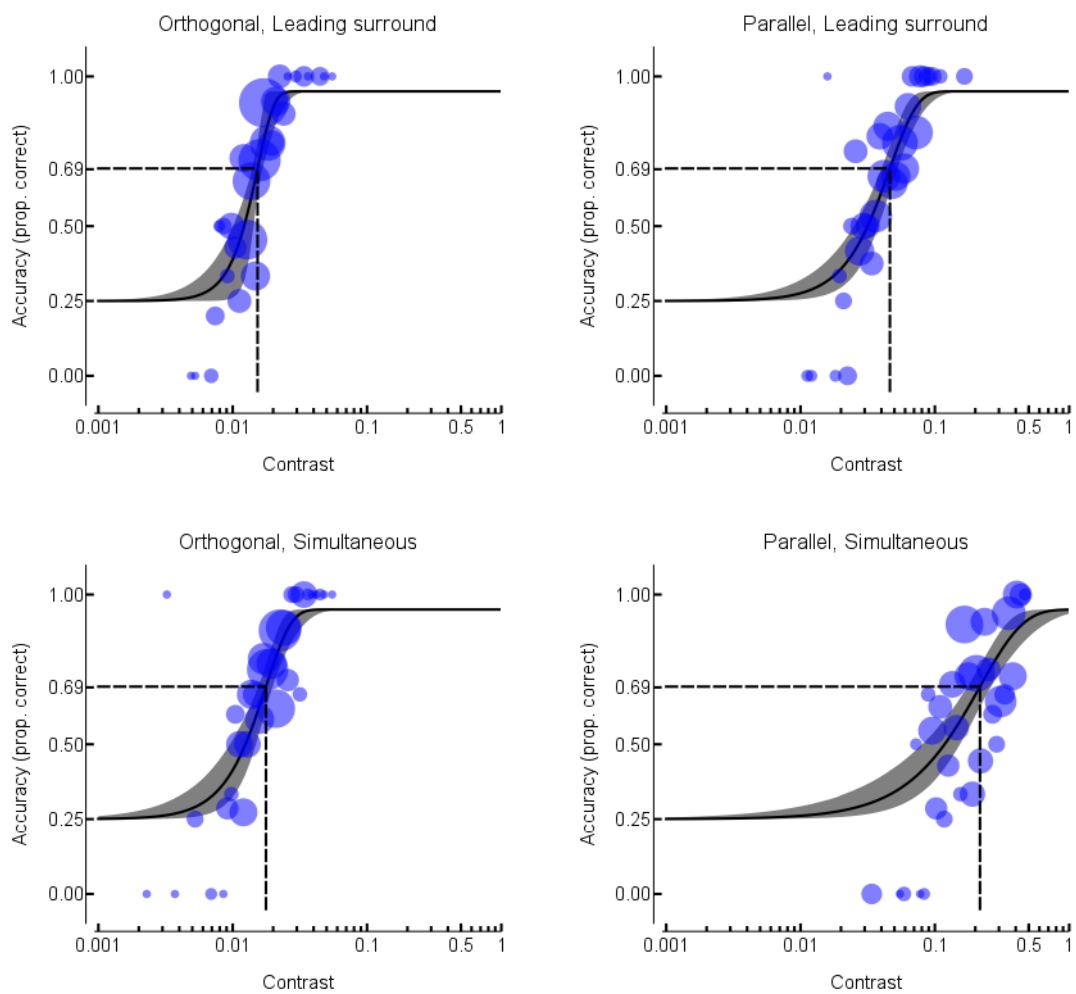

p1070

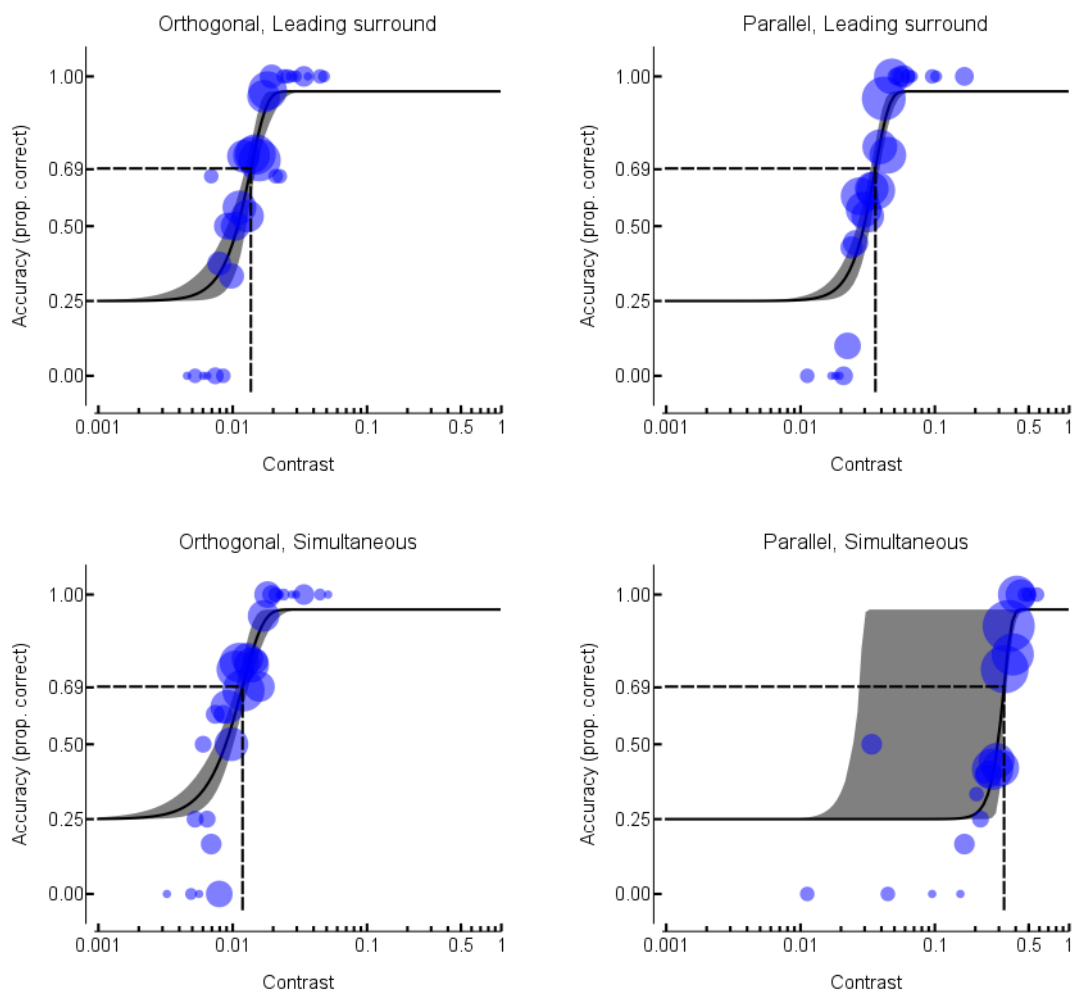

p1071

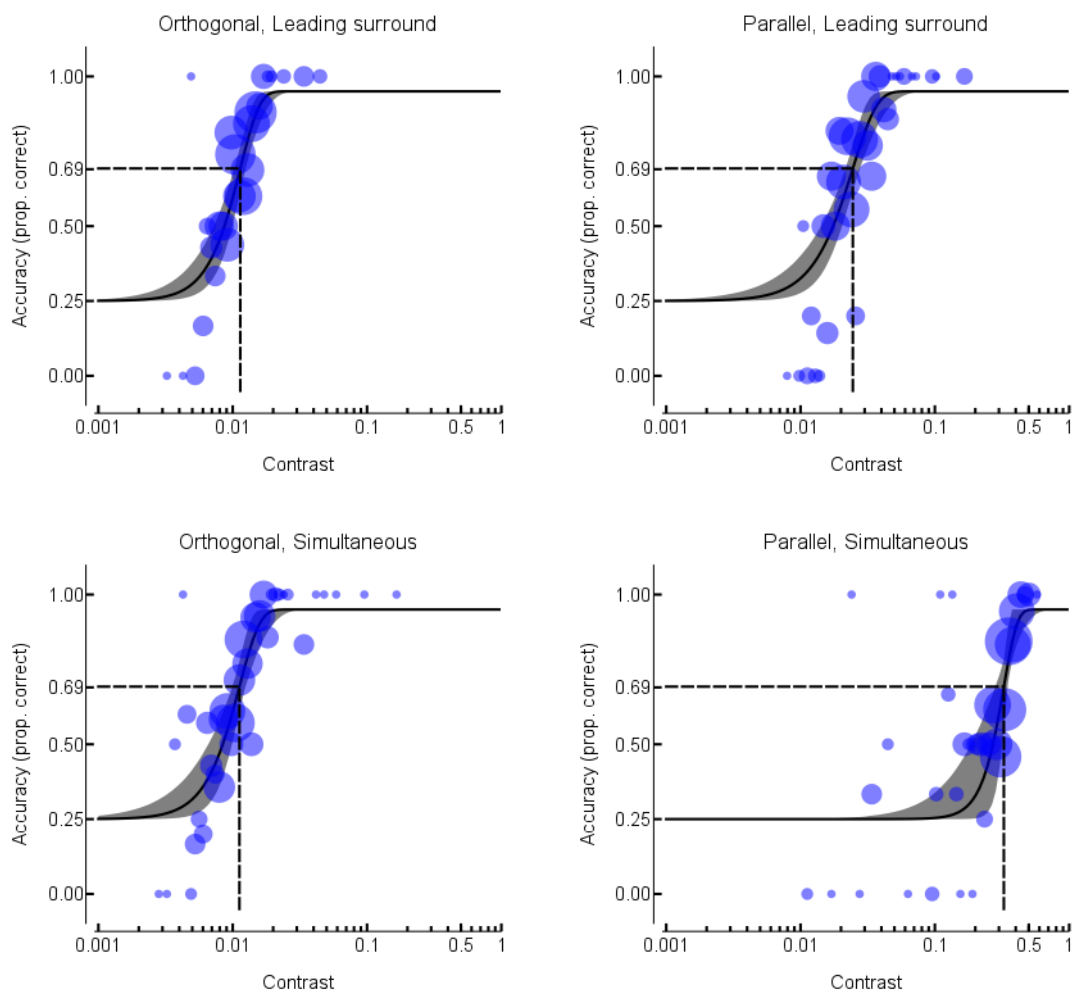

p1072

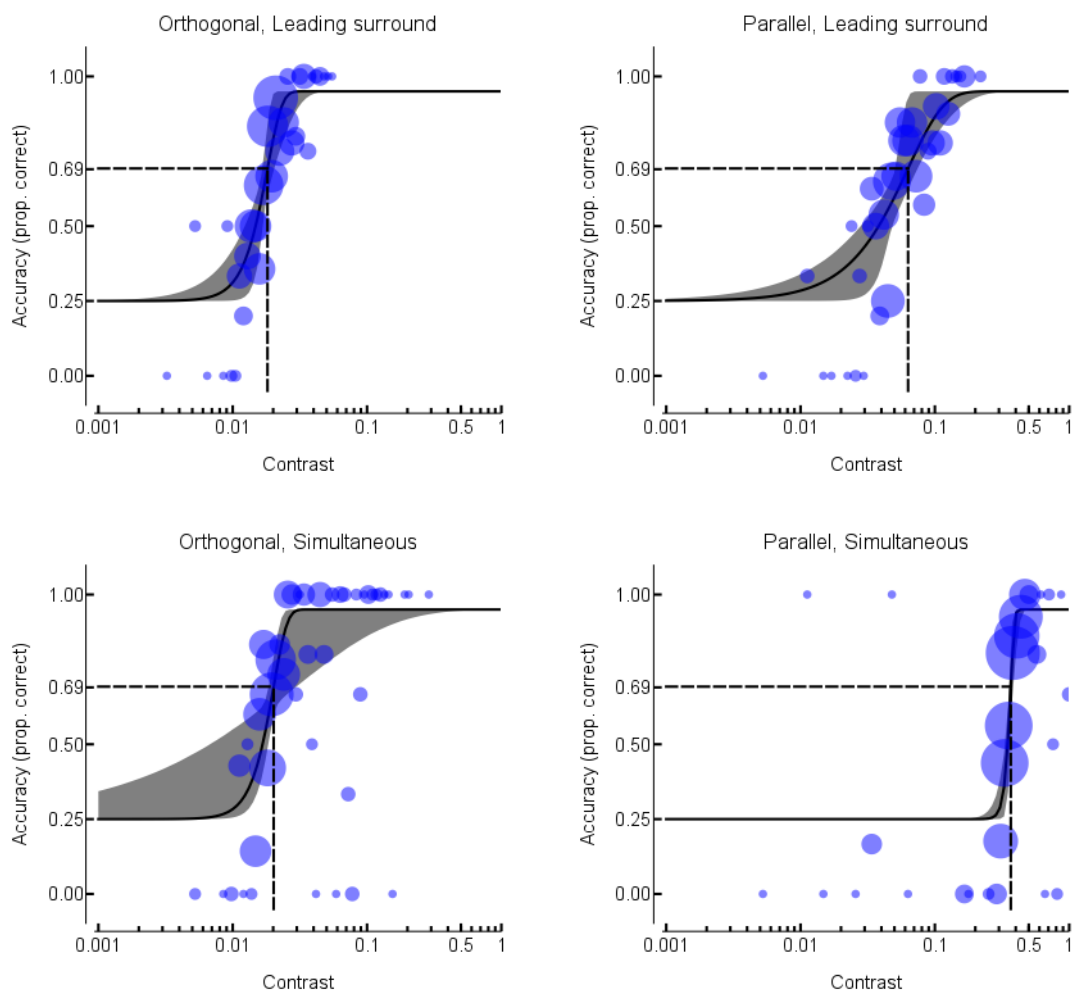

p1073

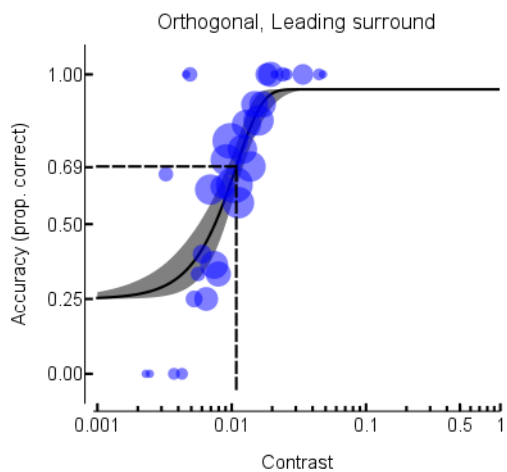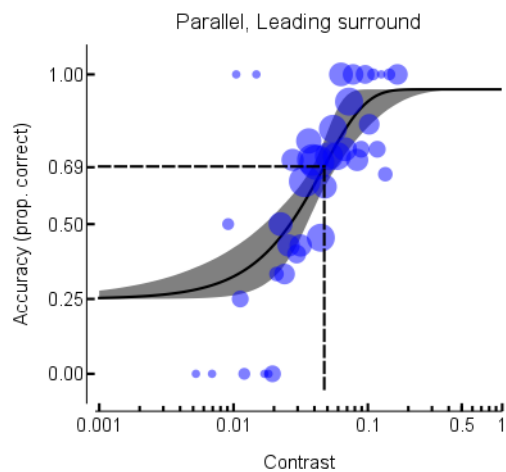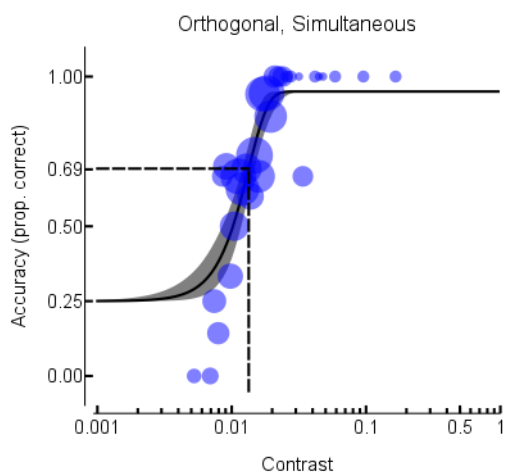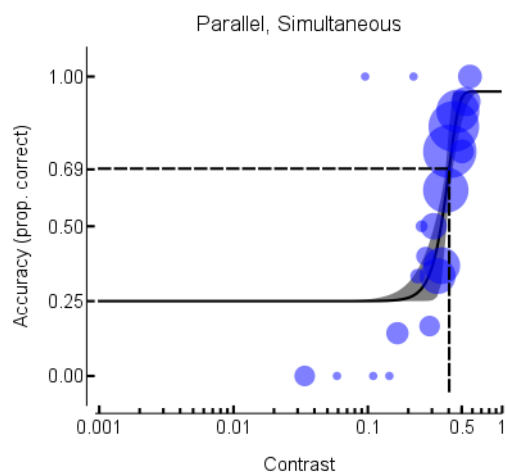

p1074

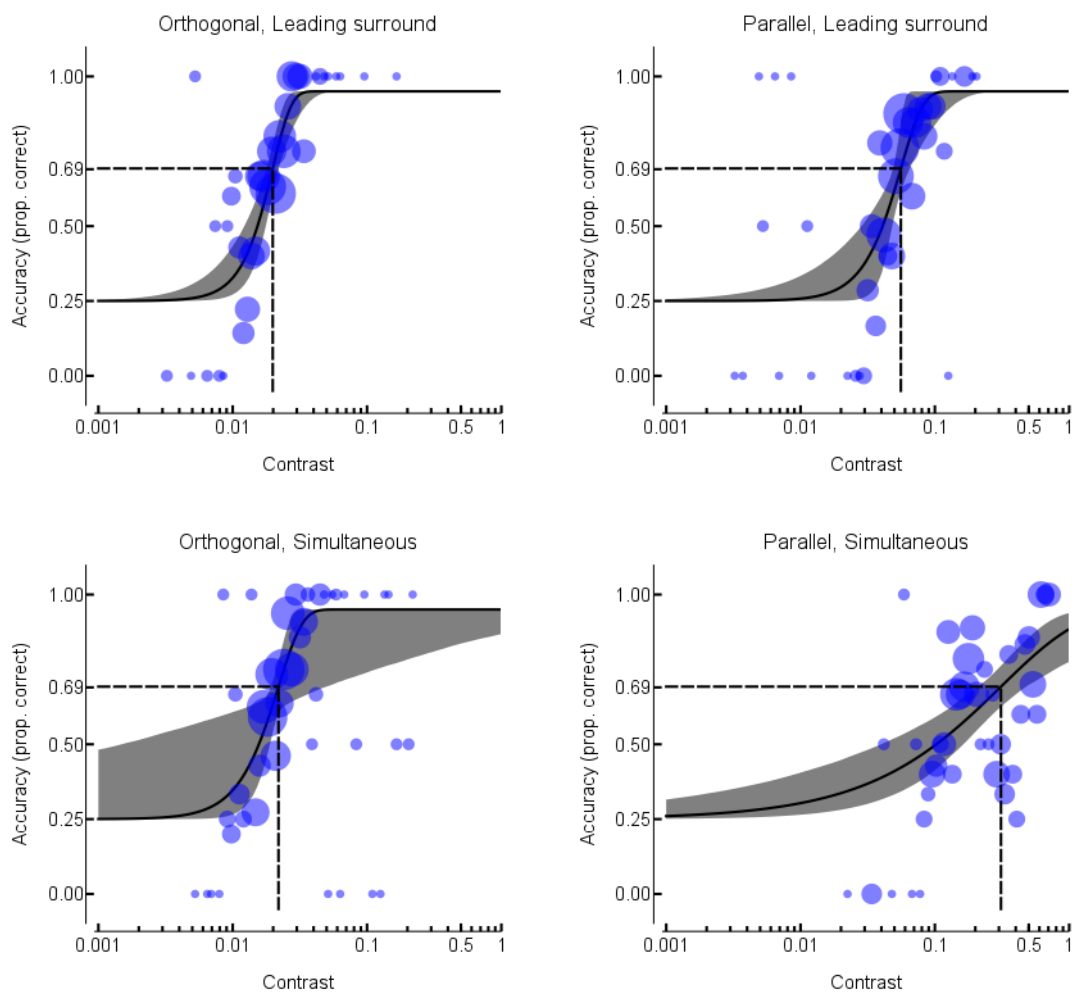

p1075

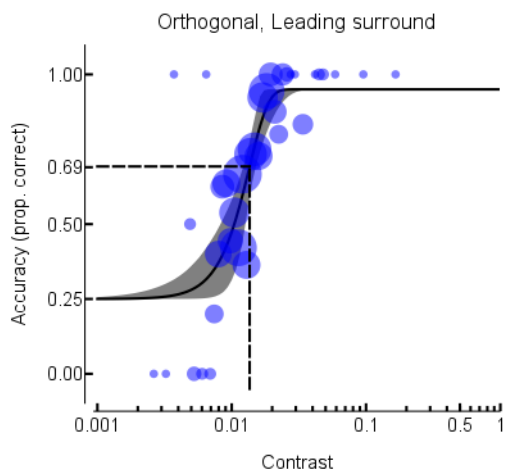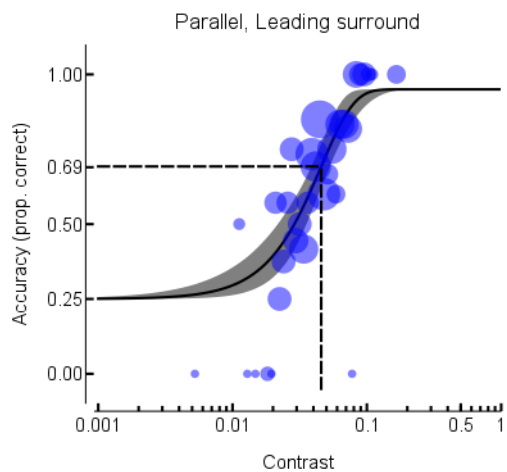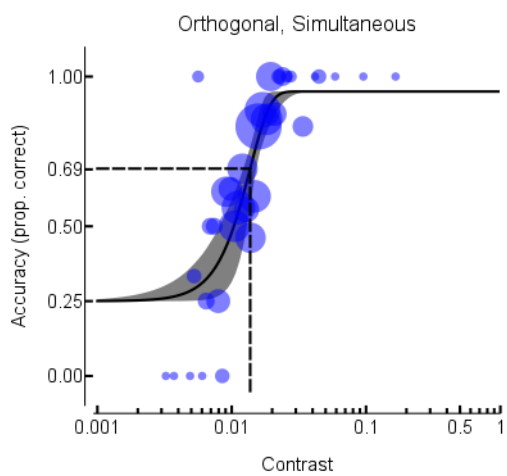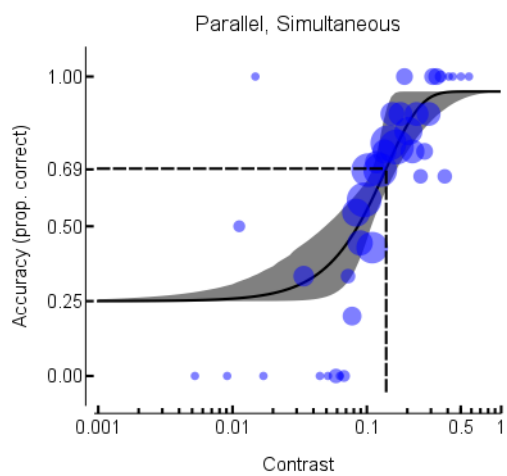

p1076

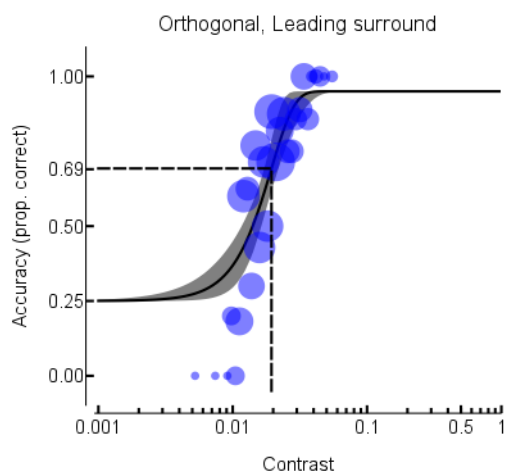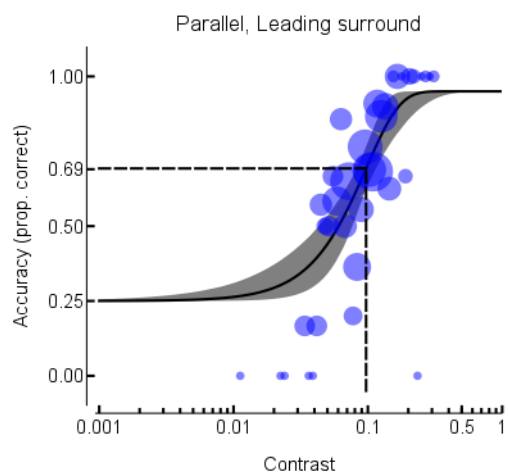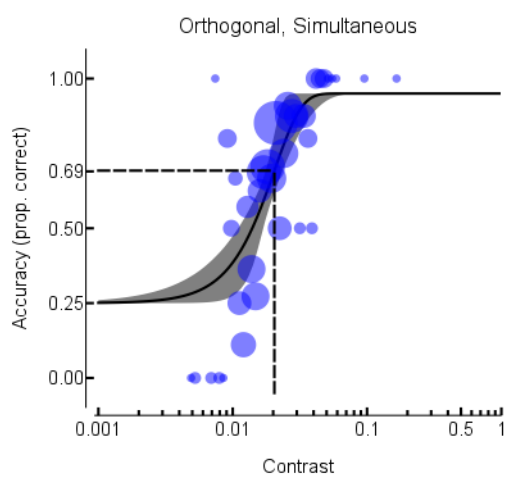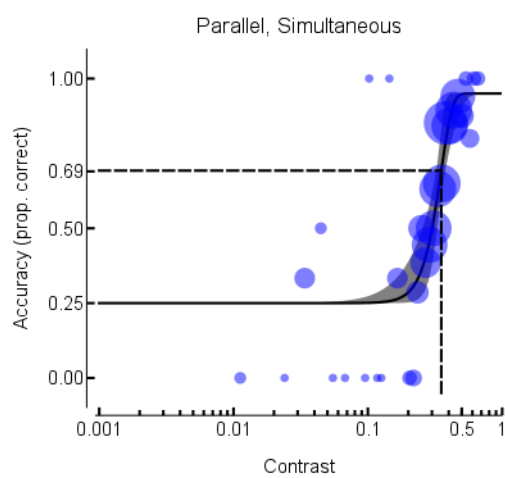



p1077

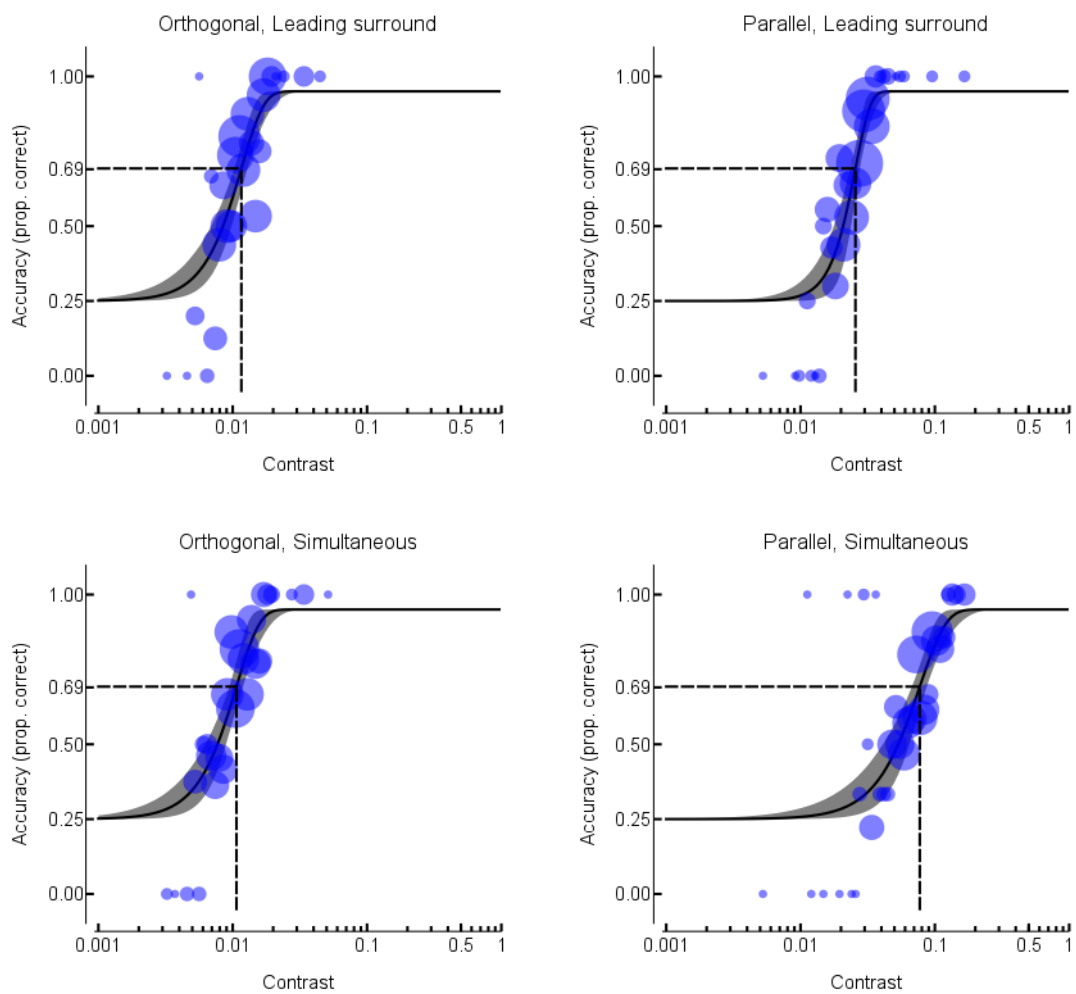

p1078

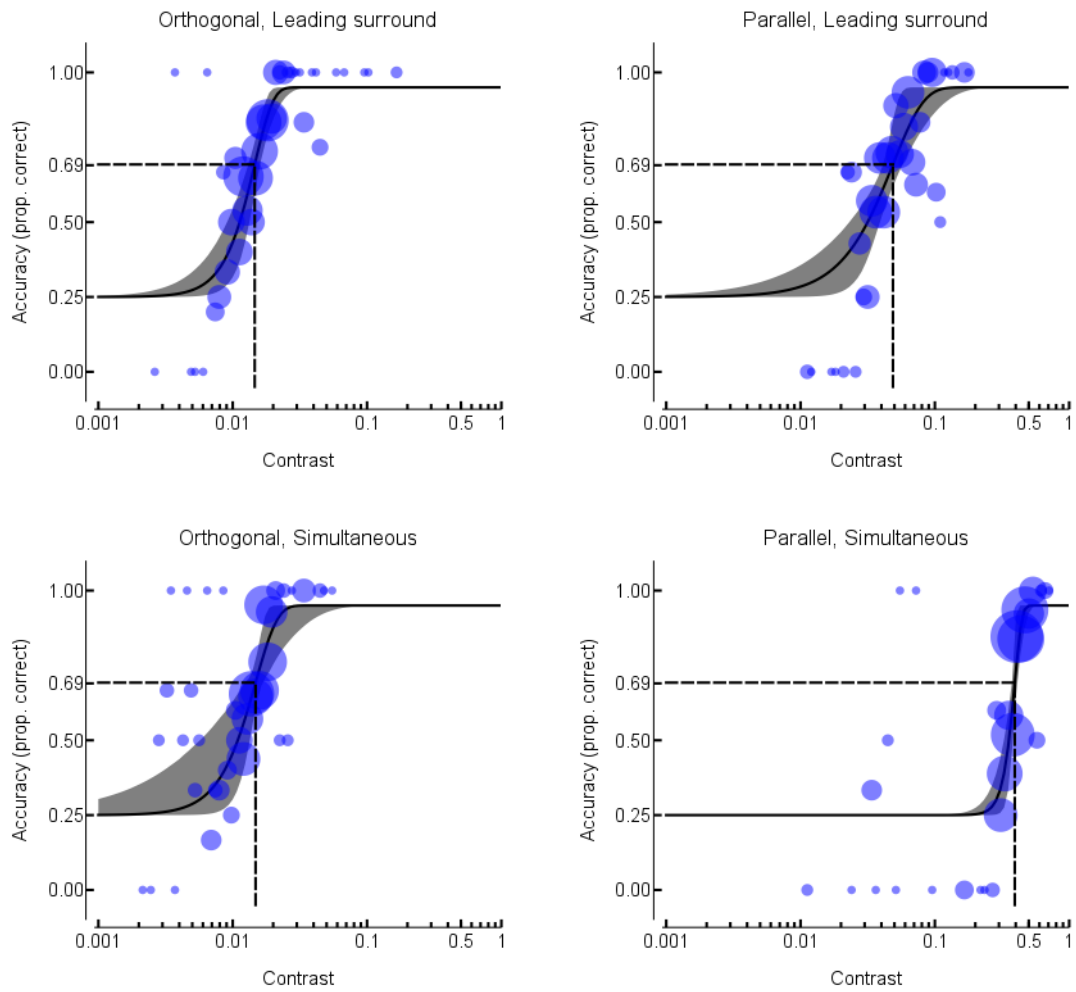

p1079 (excluded)

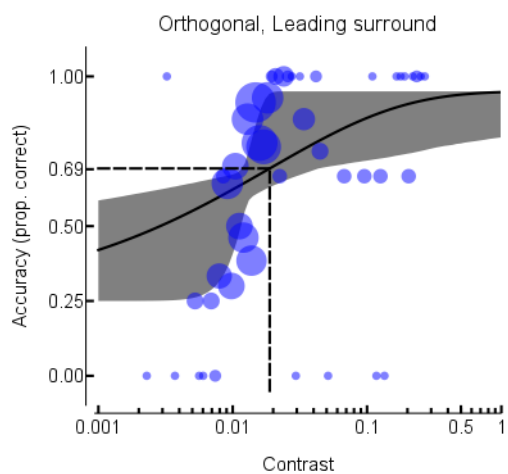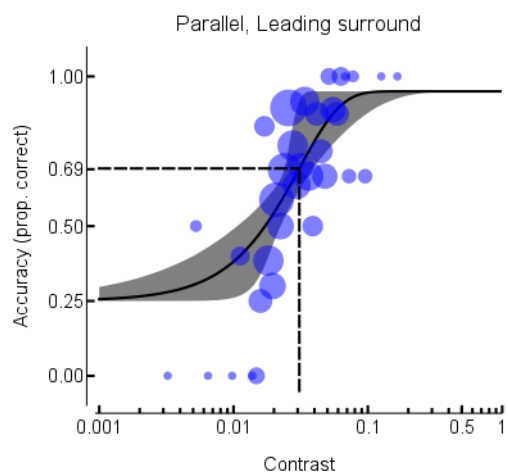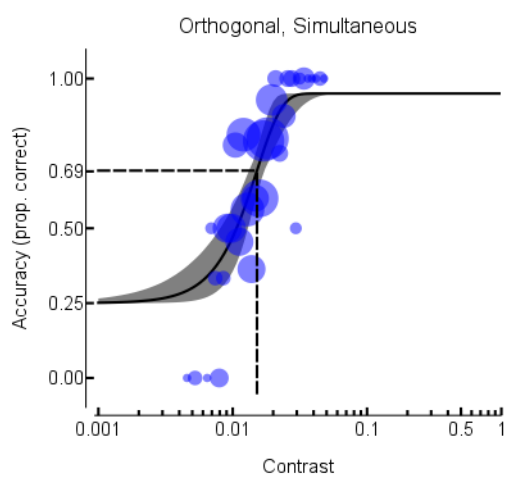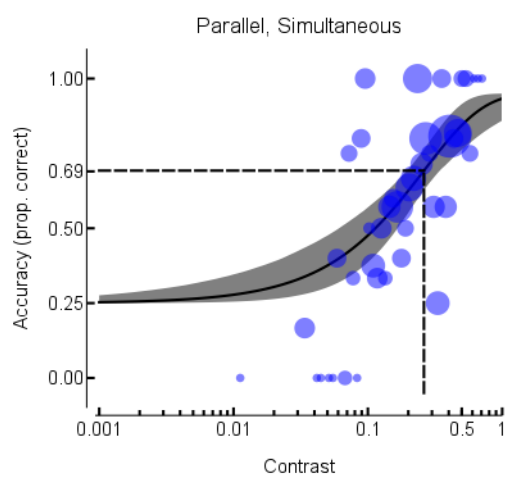

p1080

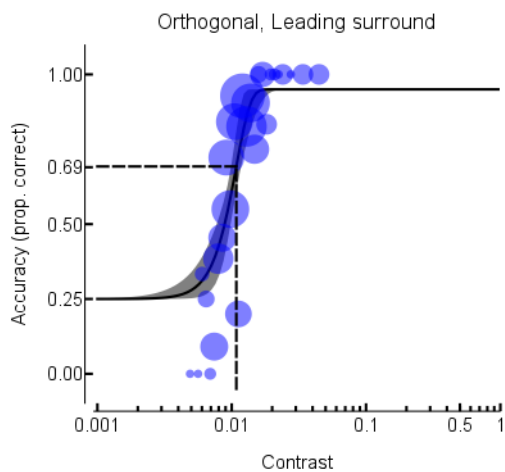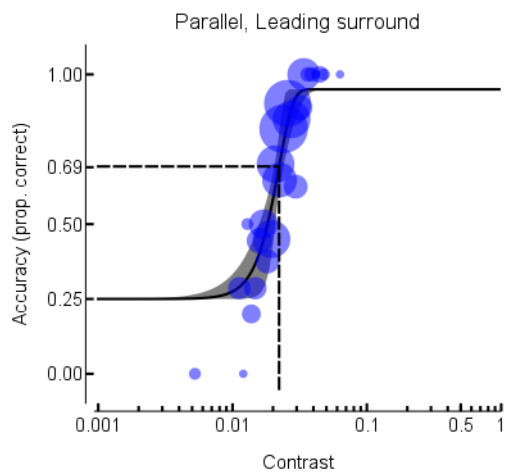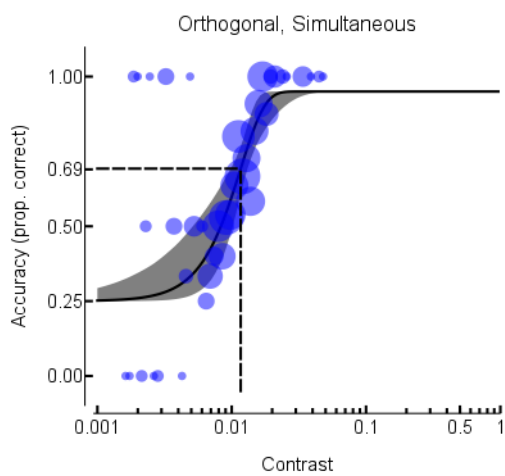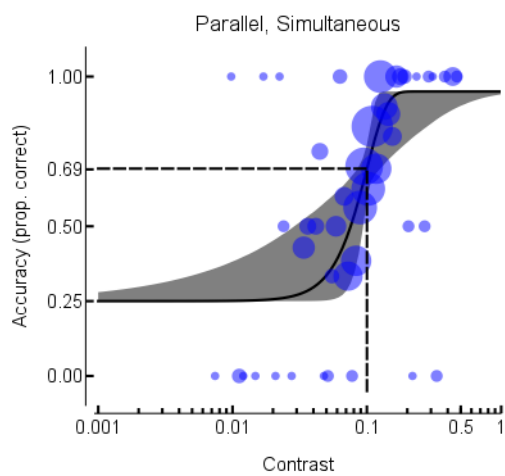

p1081

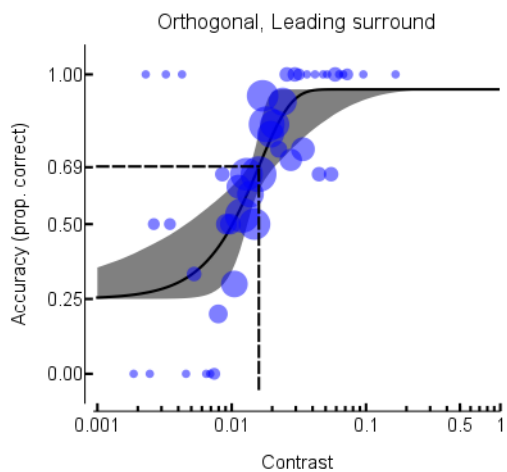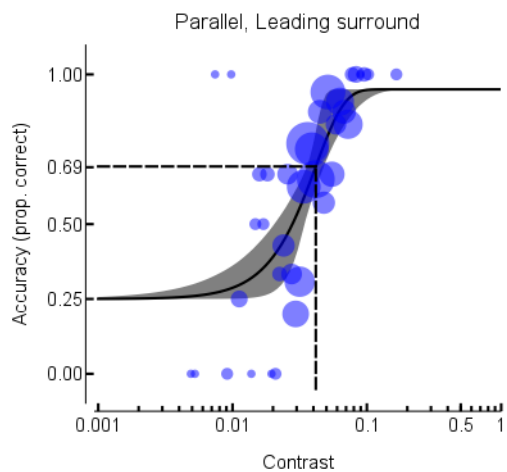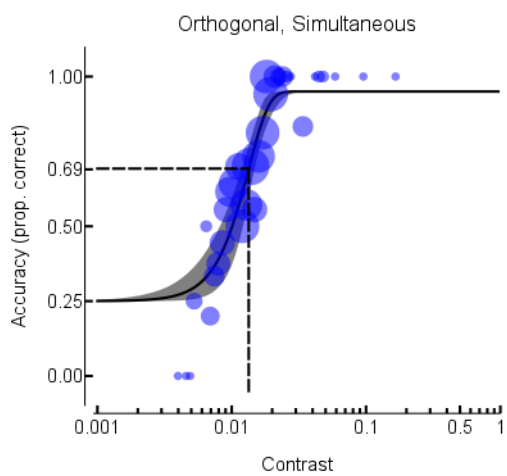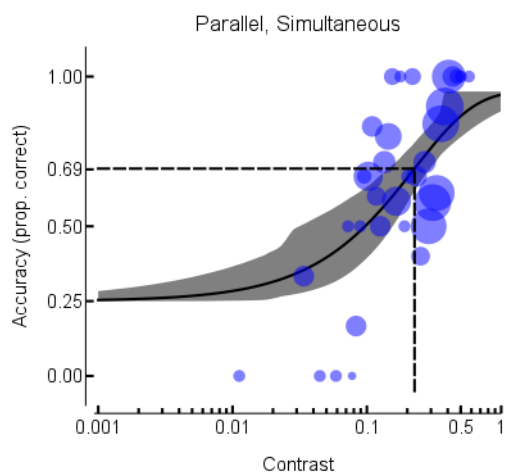

p1082

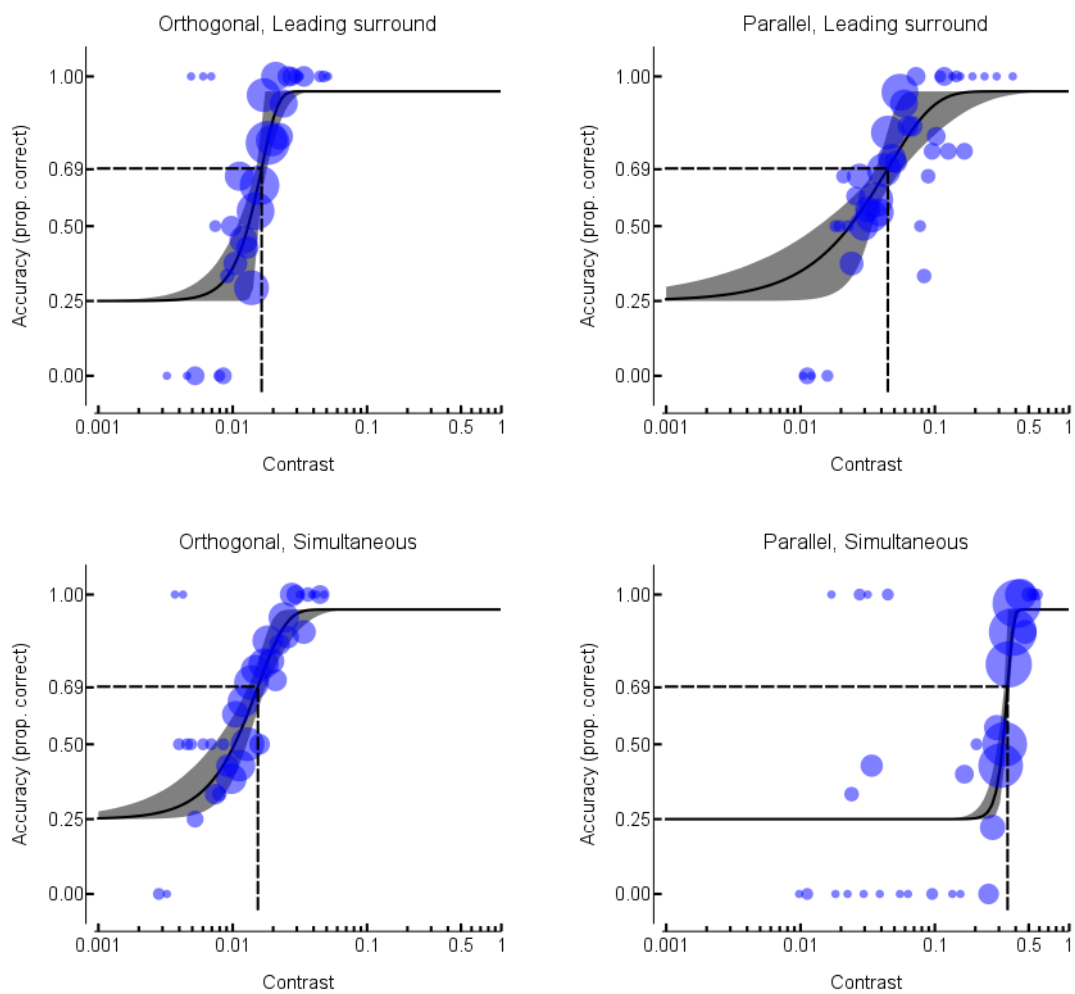

p1083

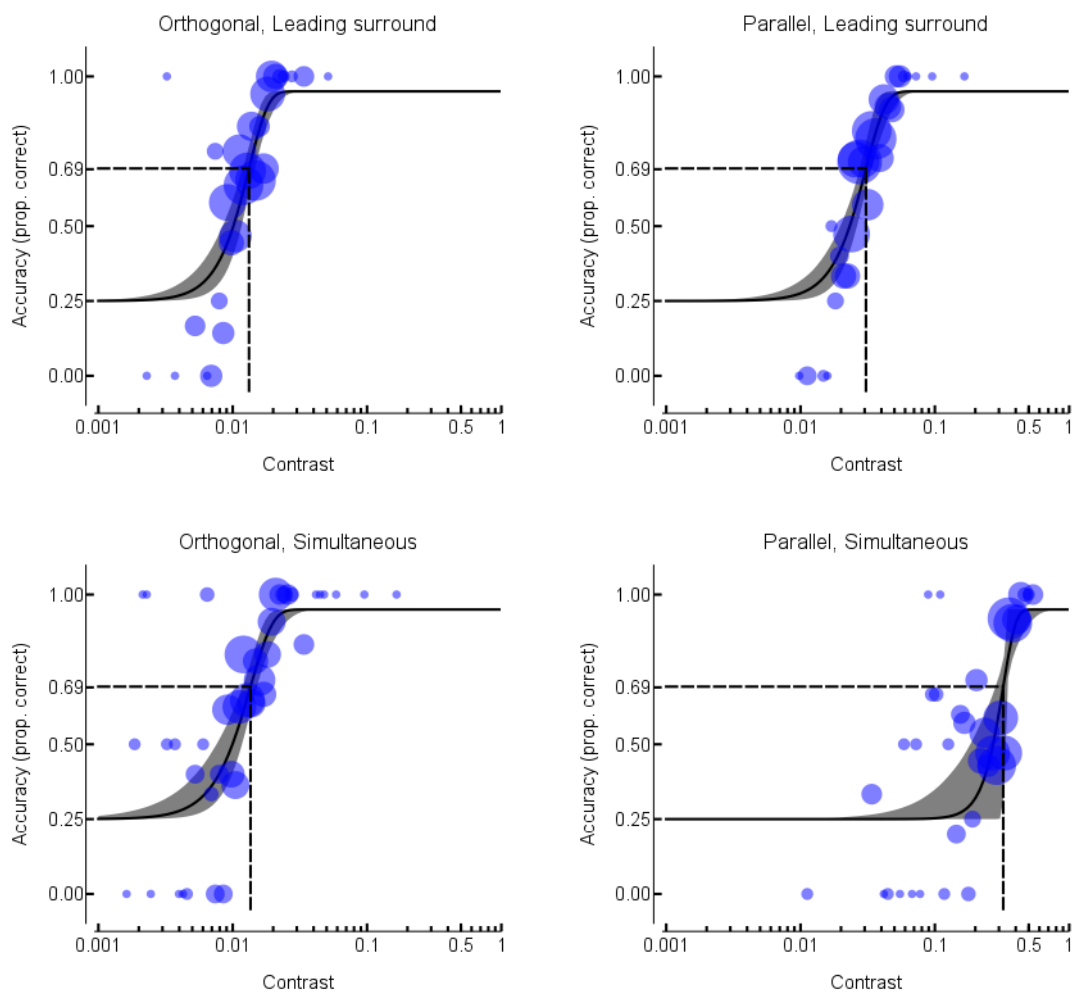

p1084

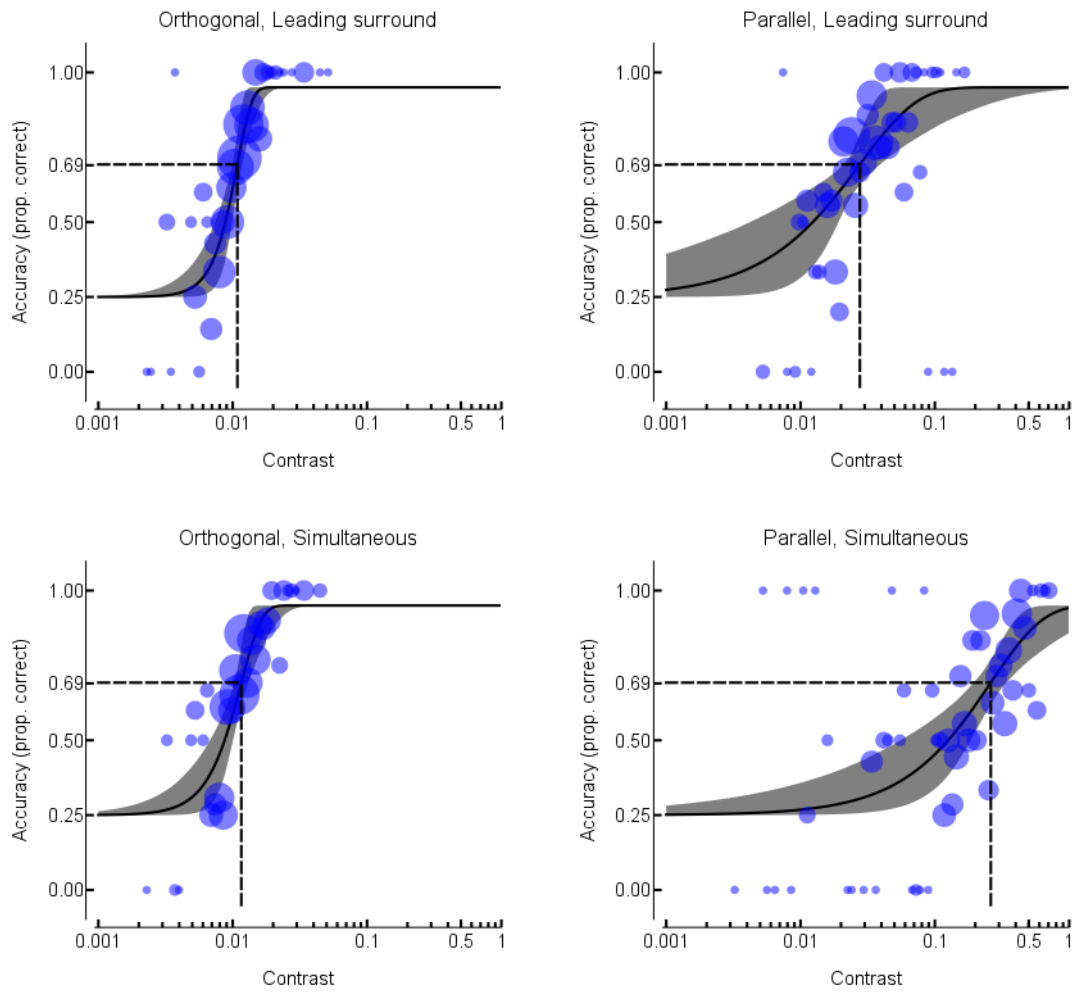



p1085

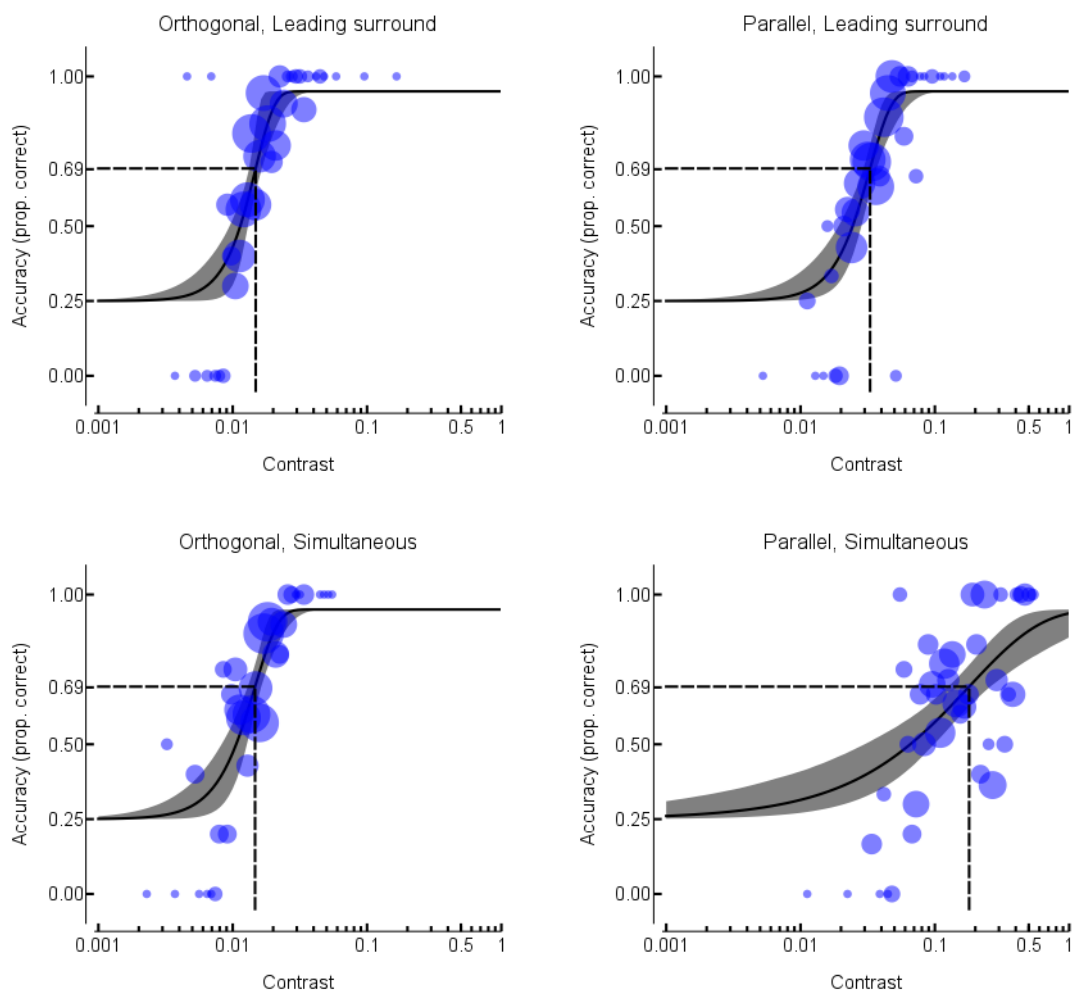

p1086

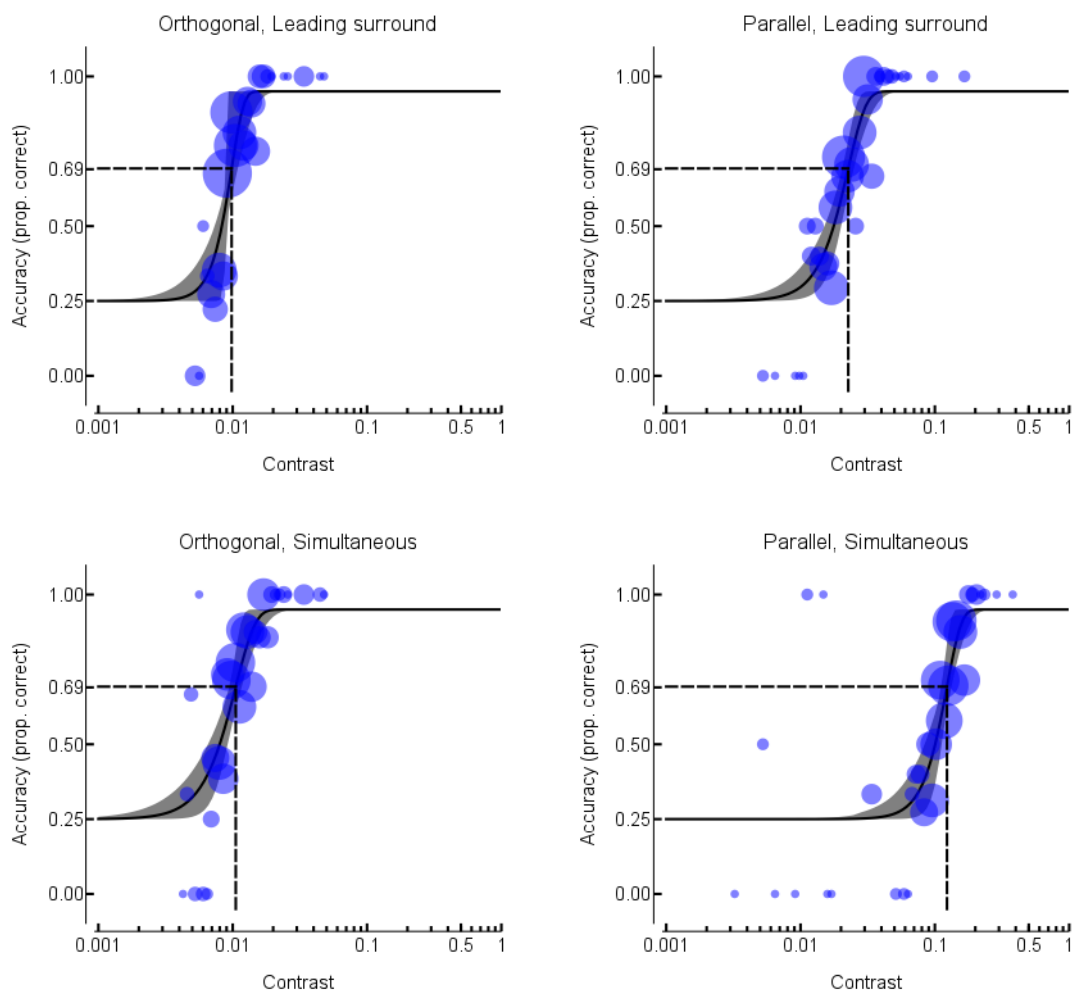

p1087

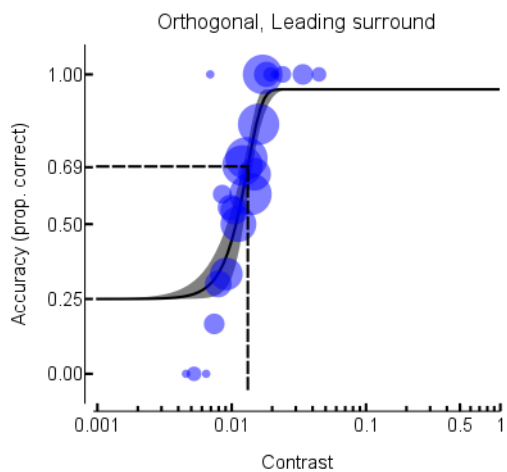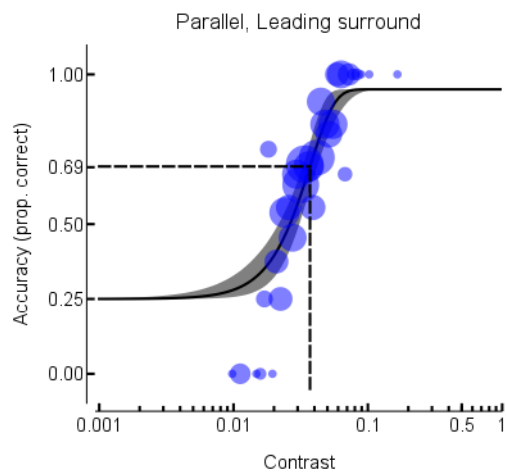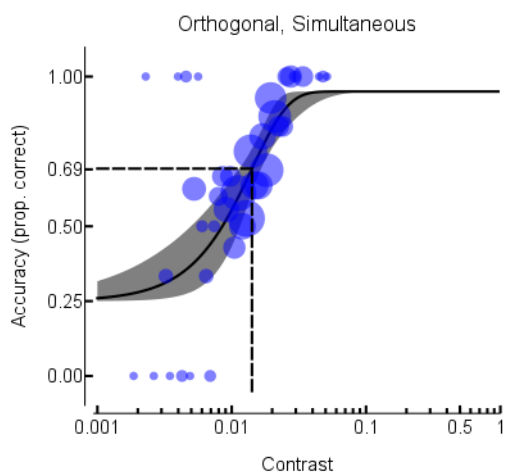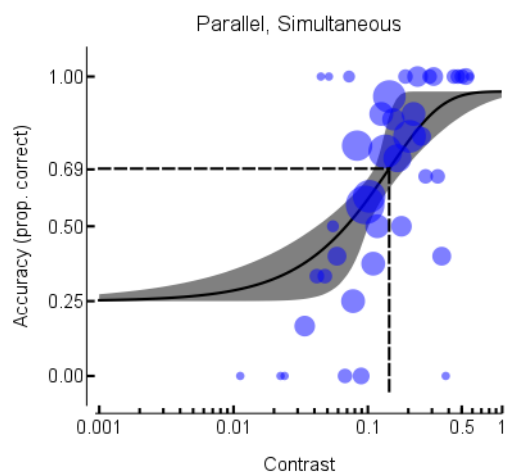

p1088

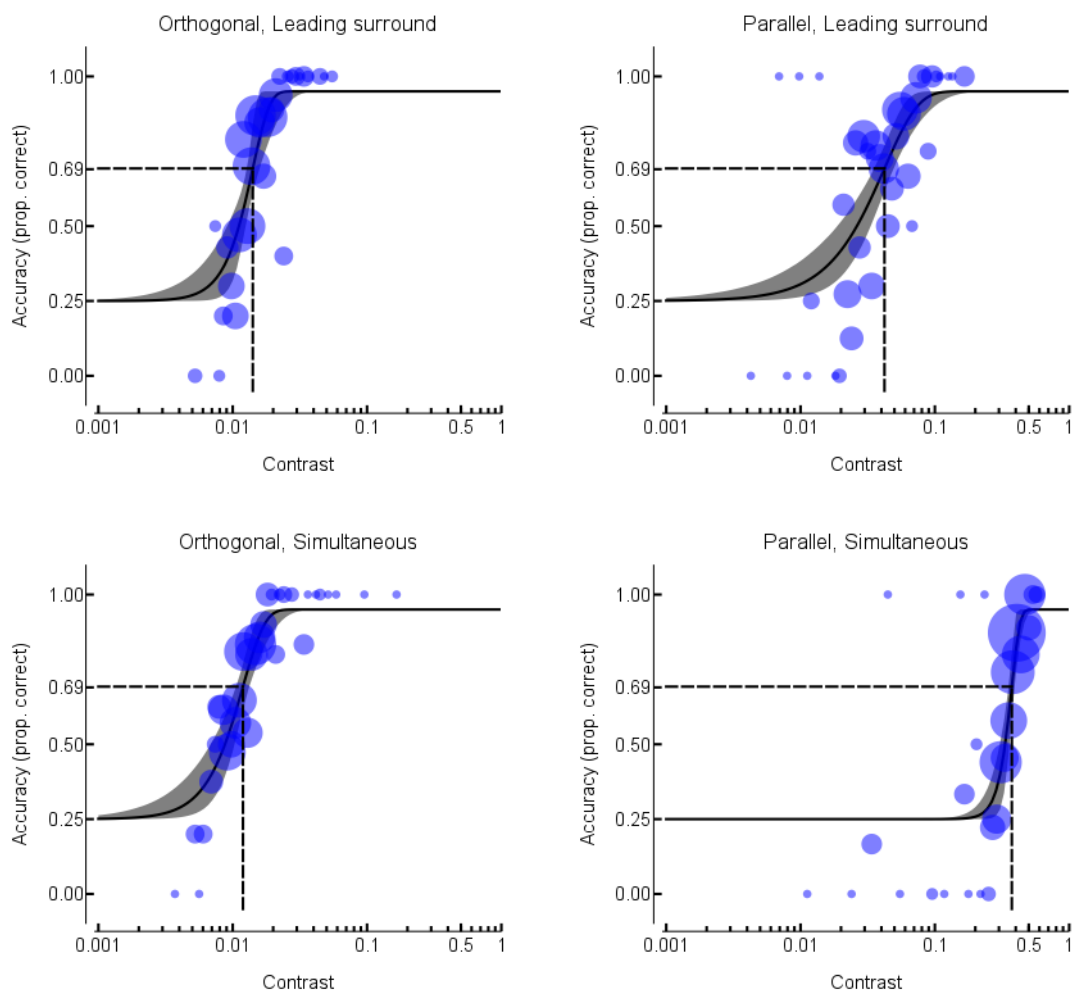

p1089

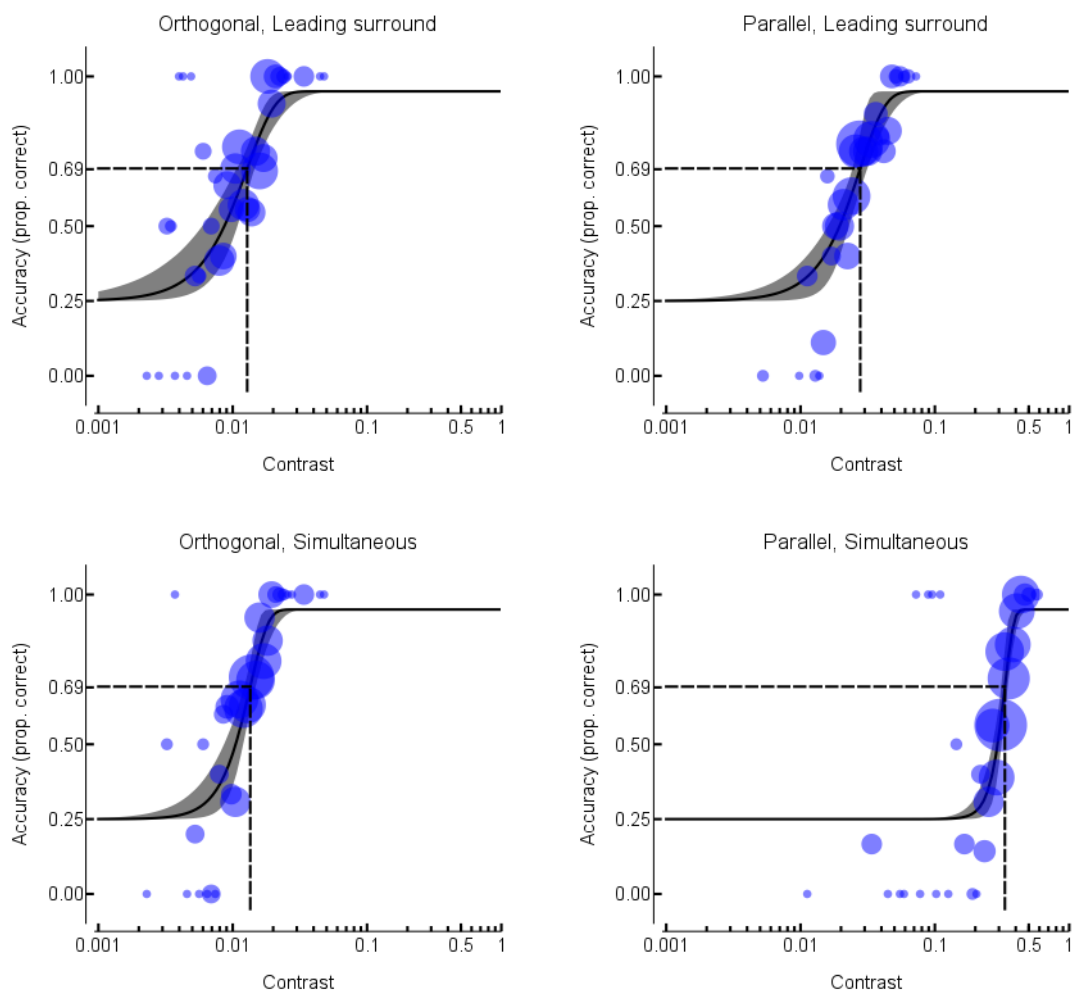

p1090

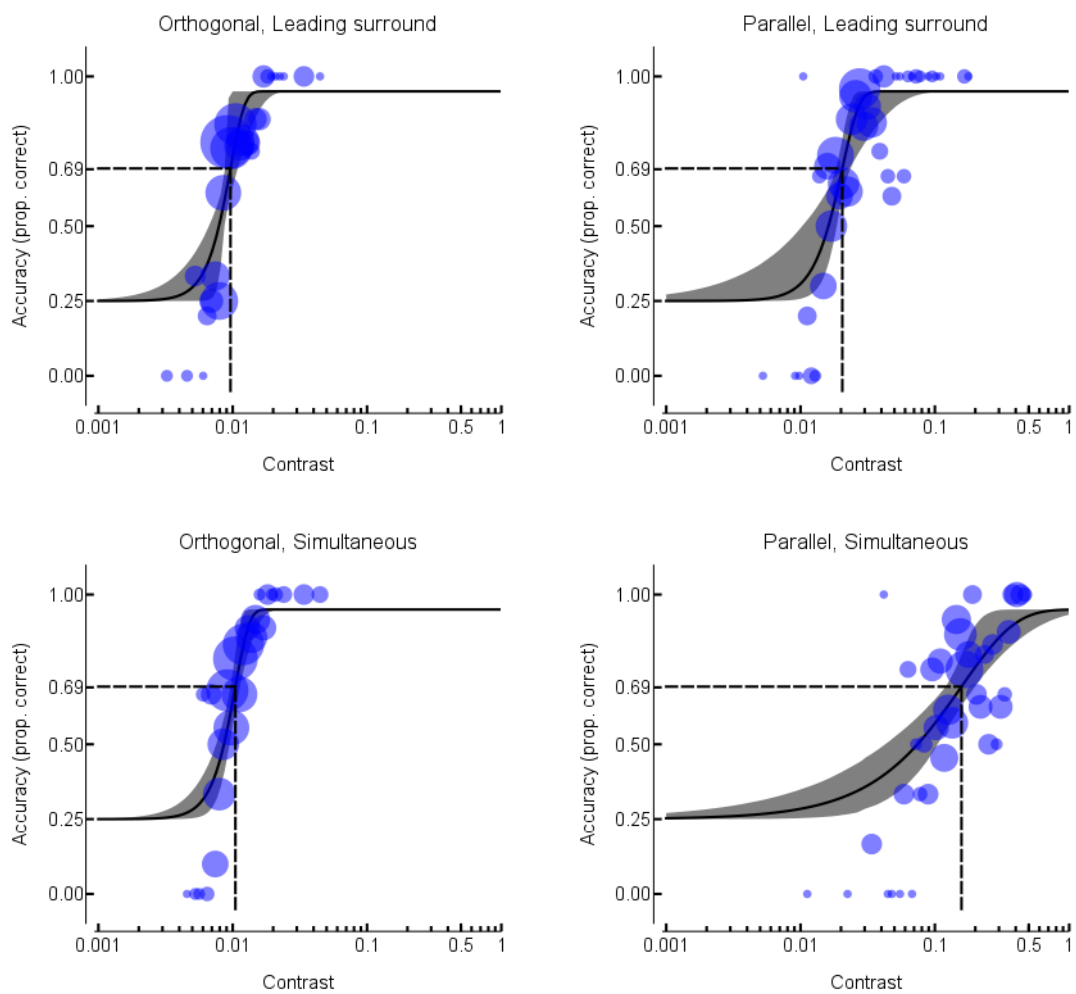

p1091

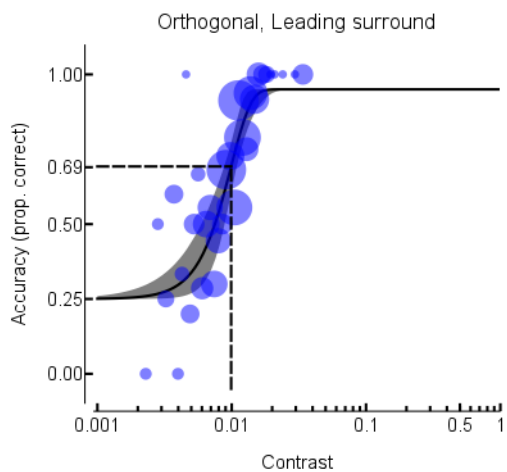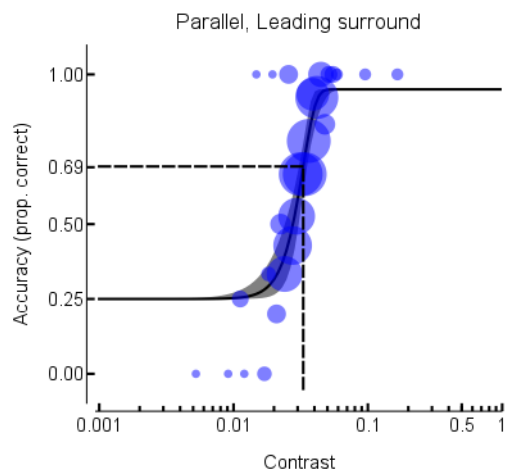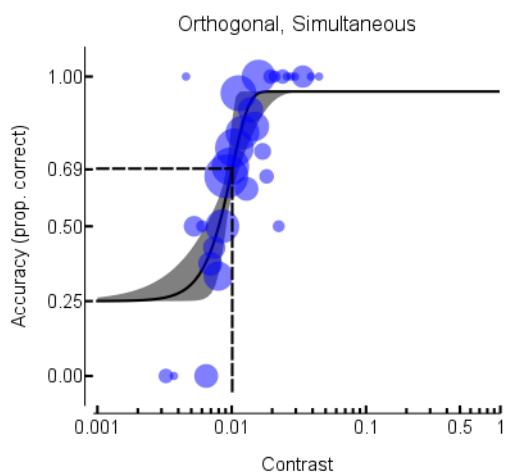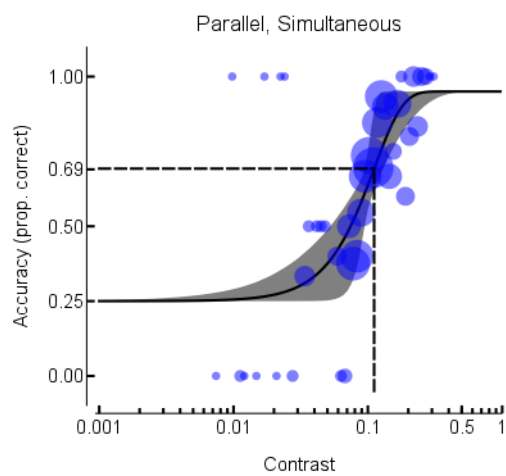

p1092

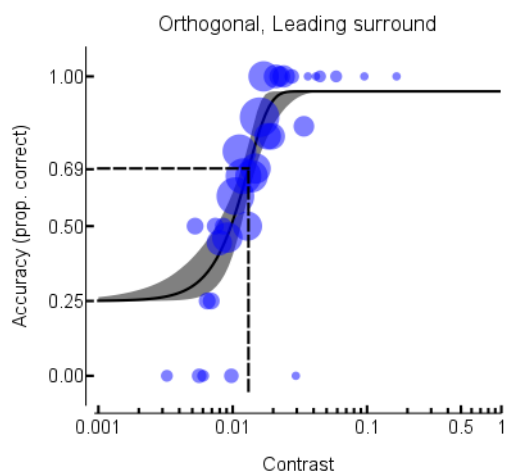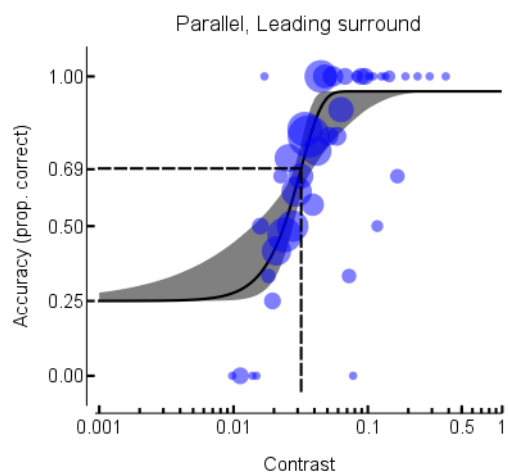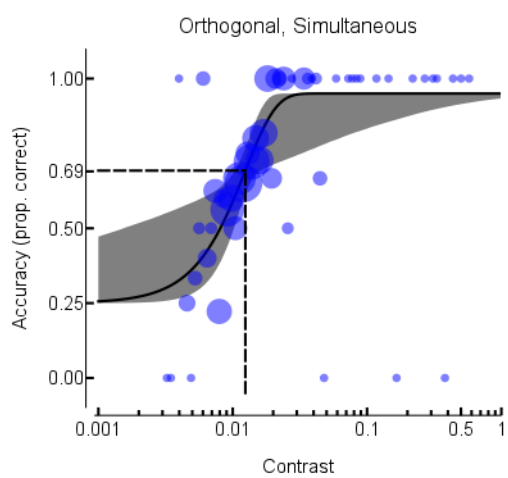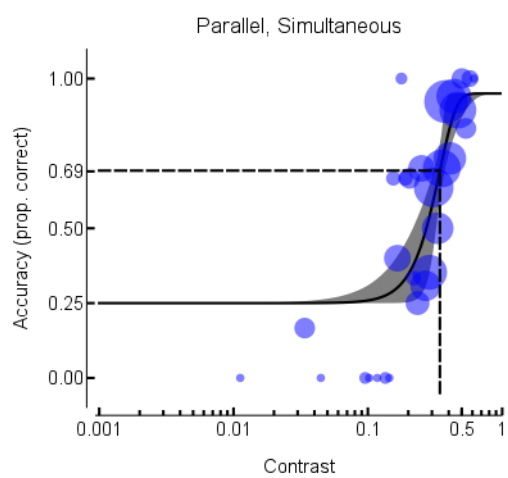



p1093

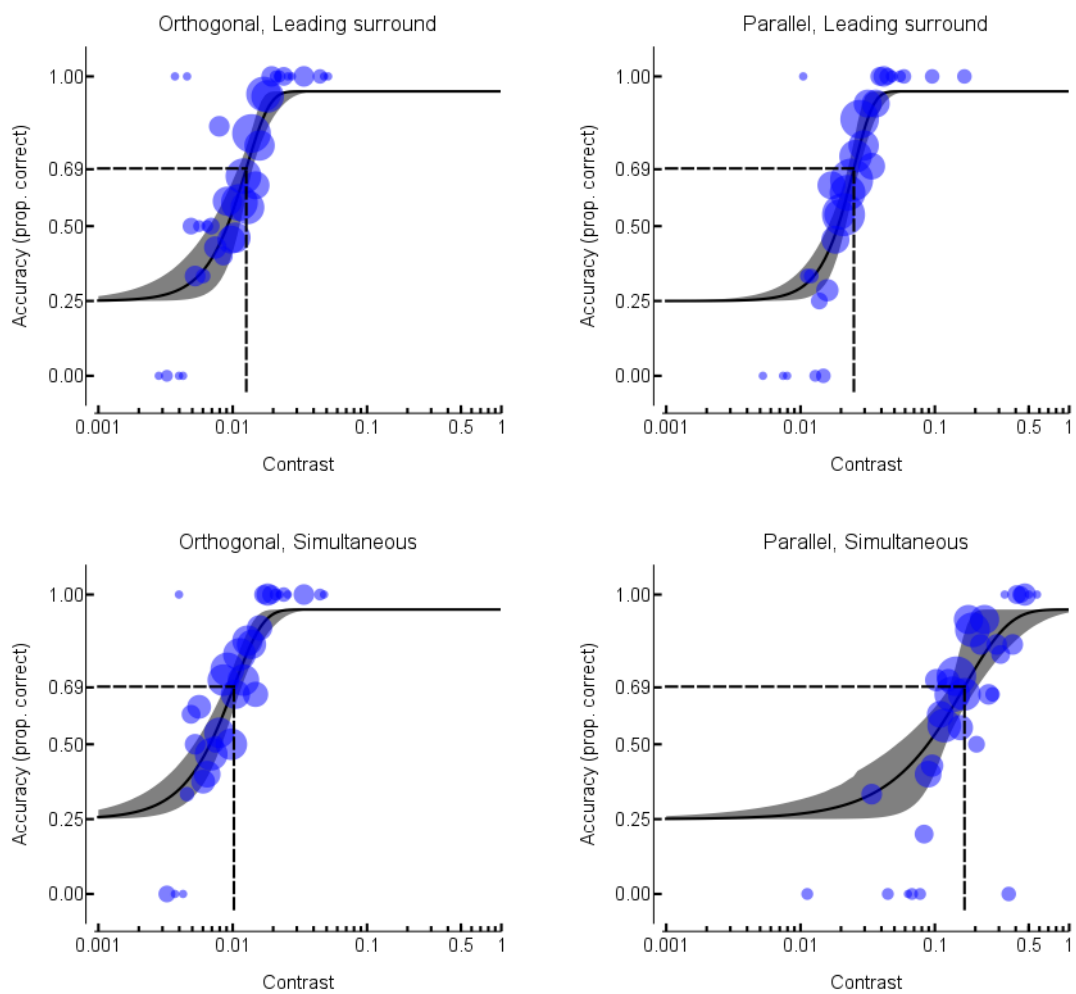

p1094

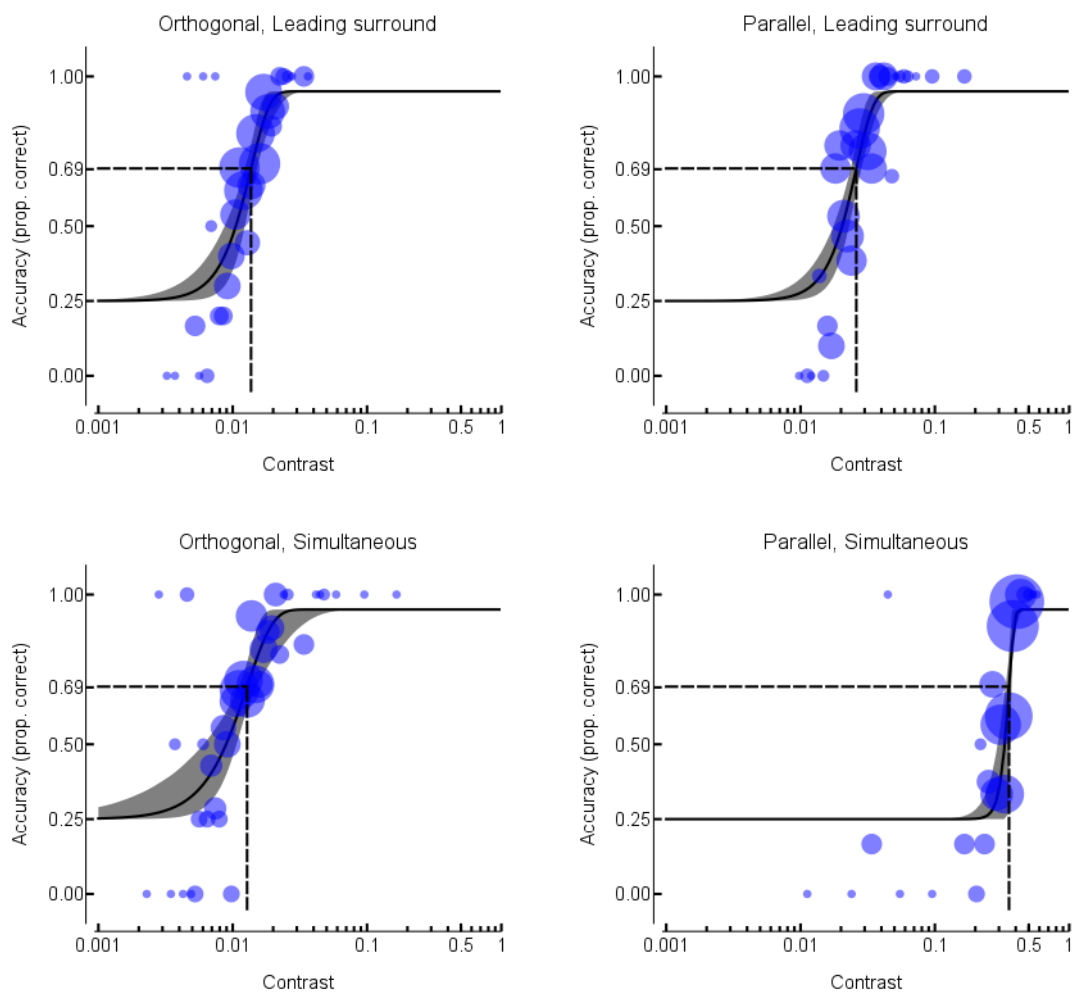

p1095

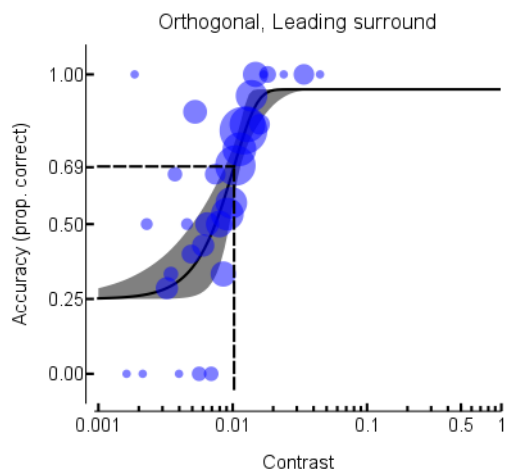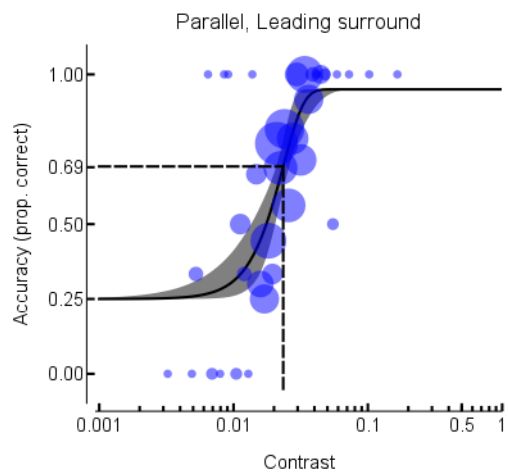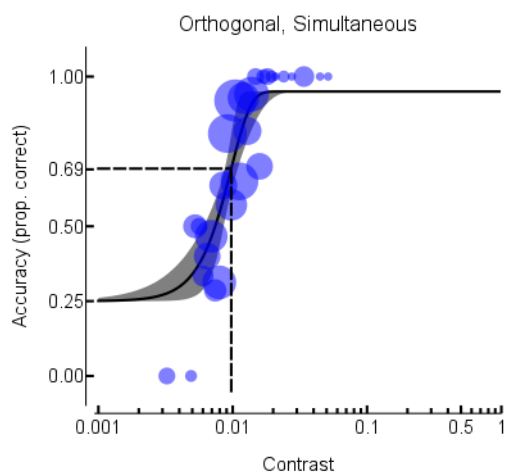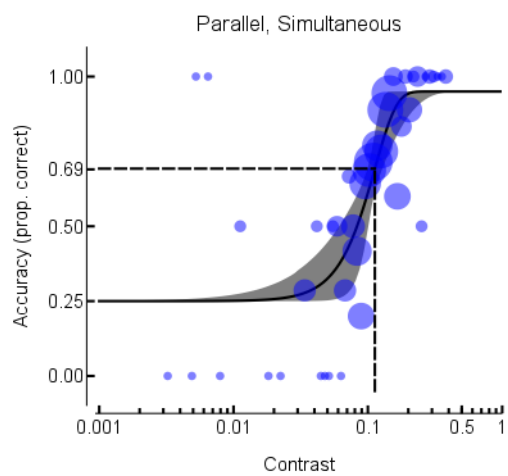

p1096

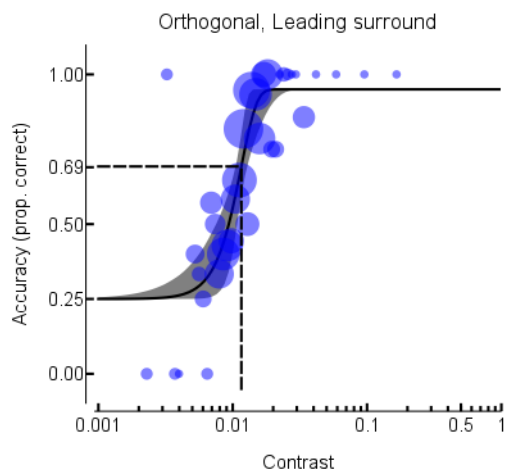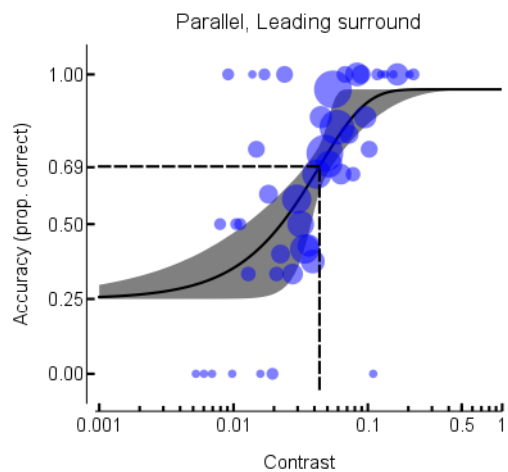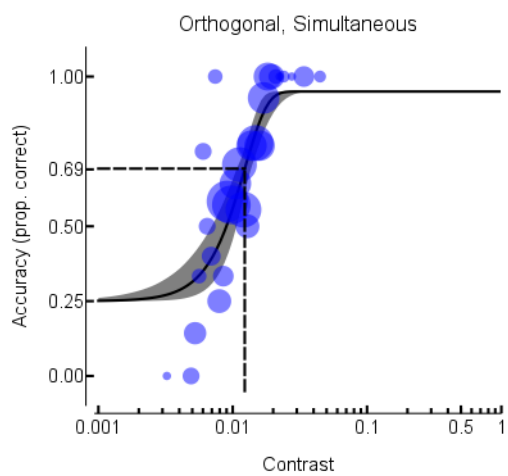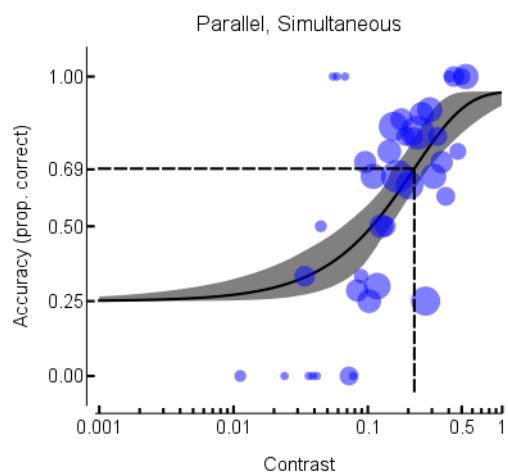

p1097

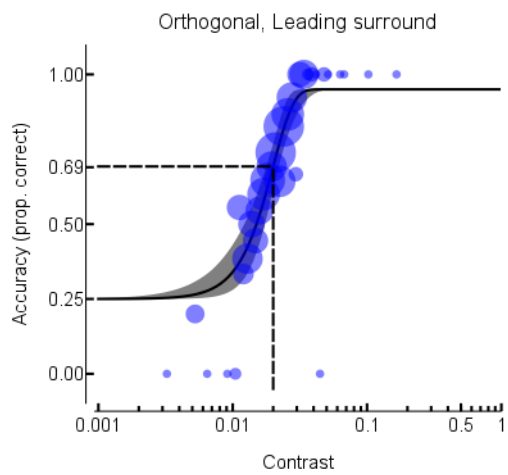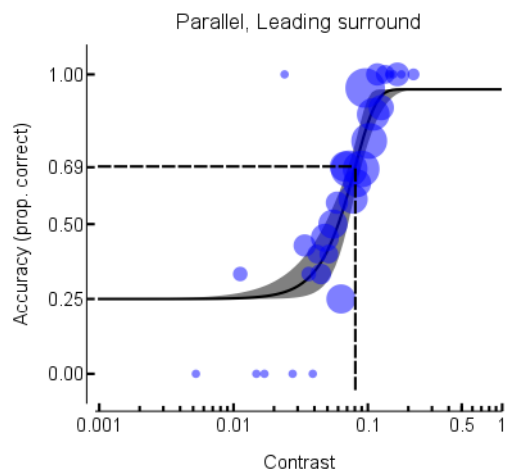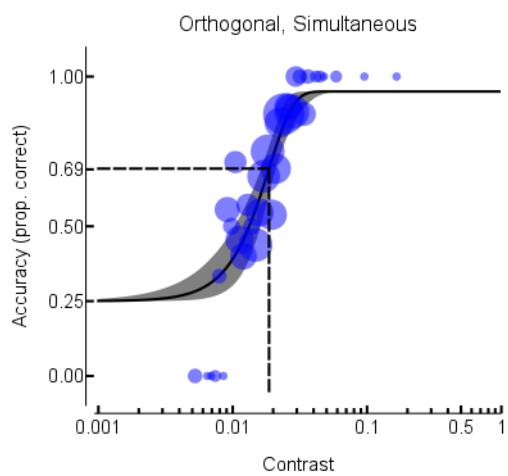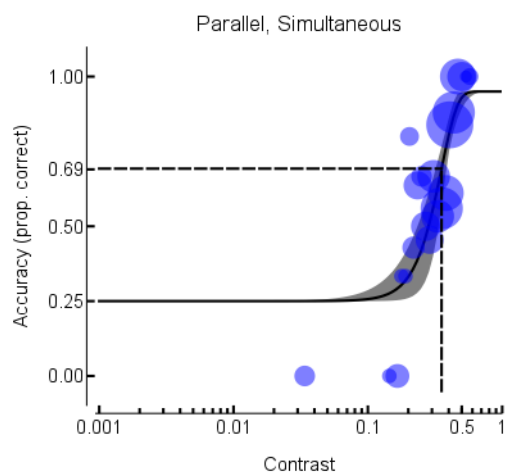

p1098 (excluded)

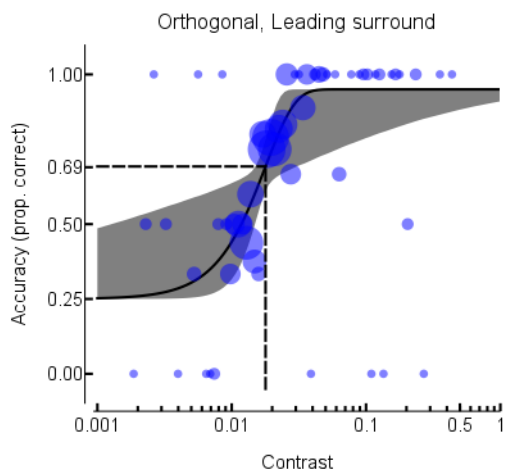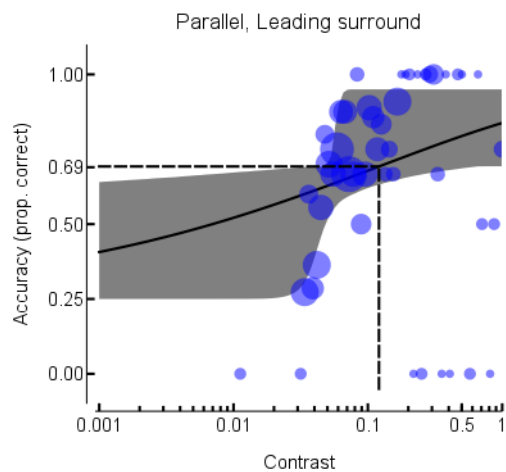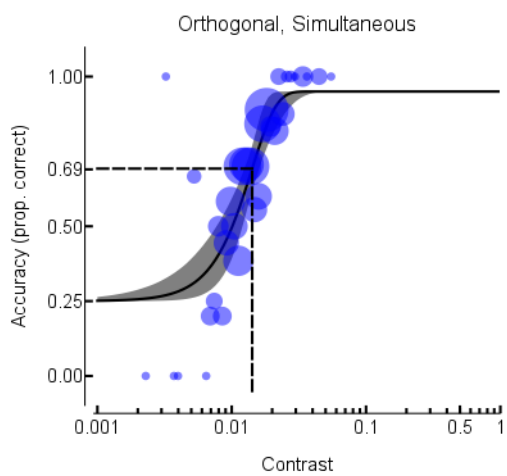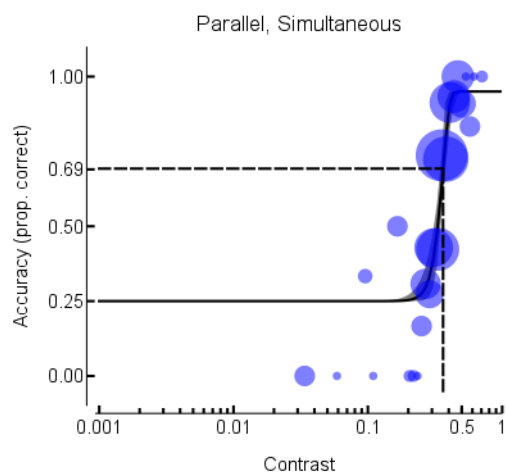

p1099

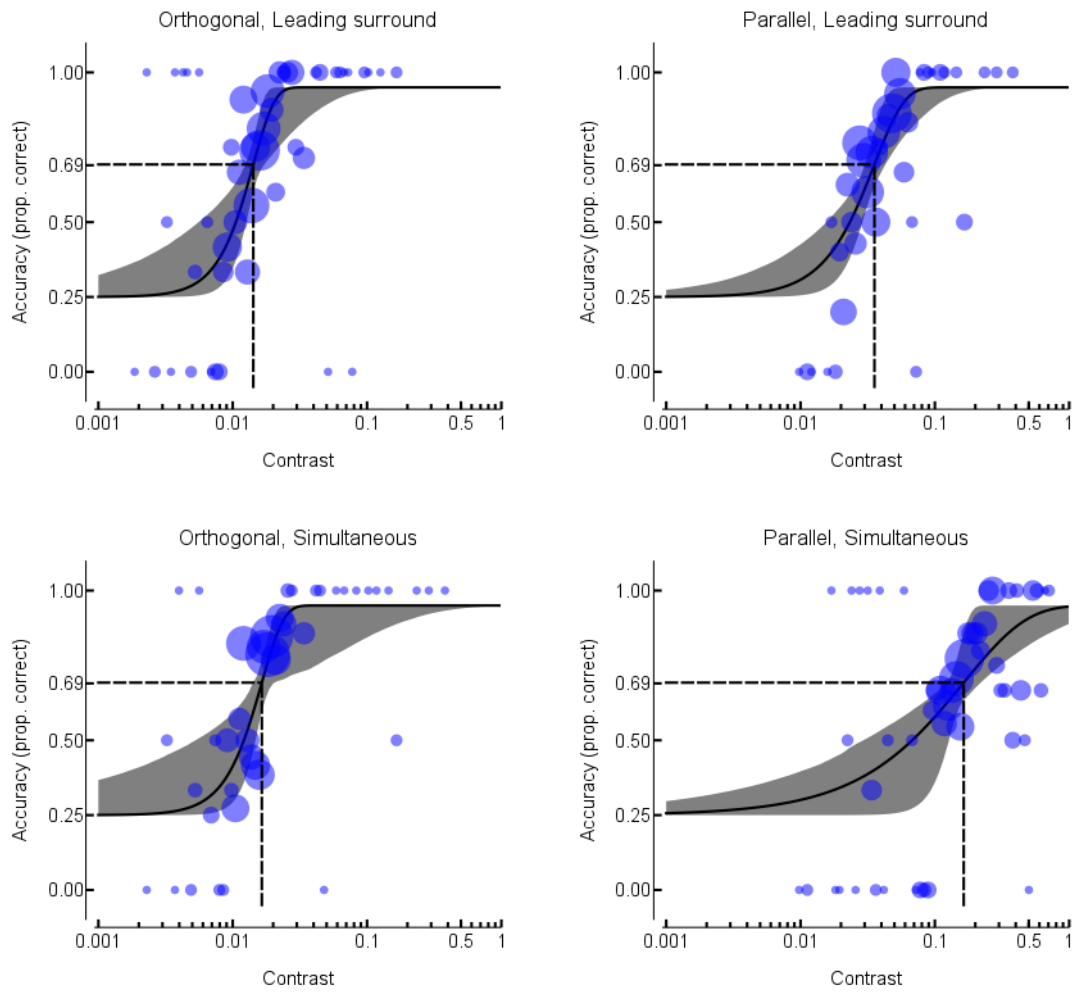

p1100

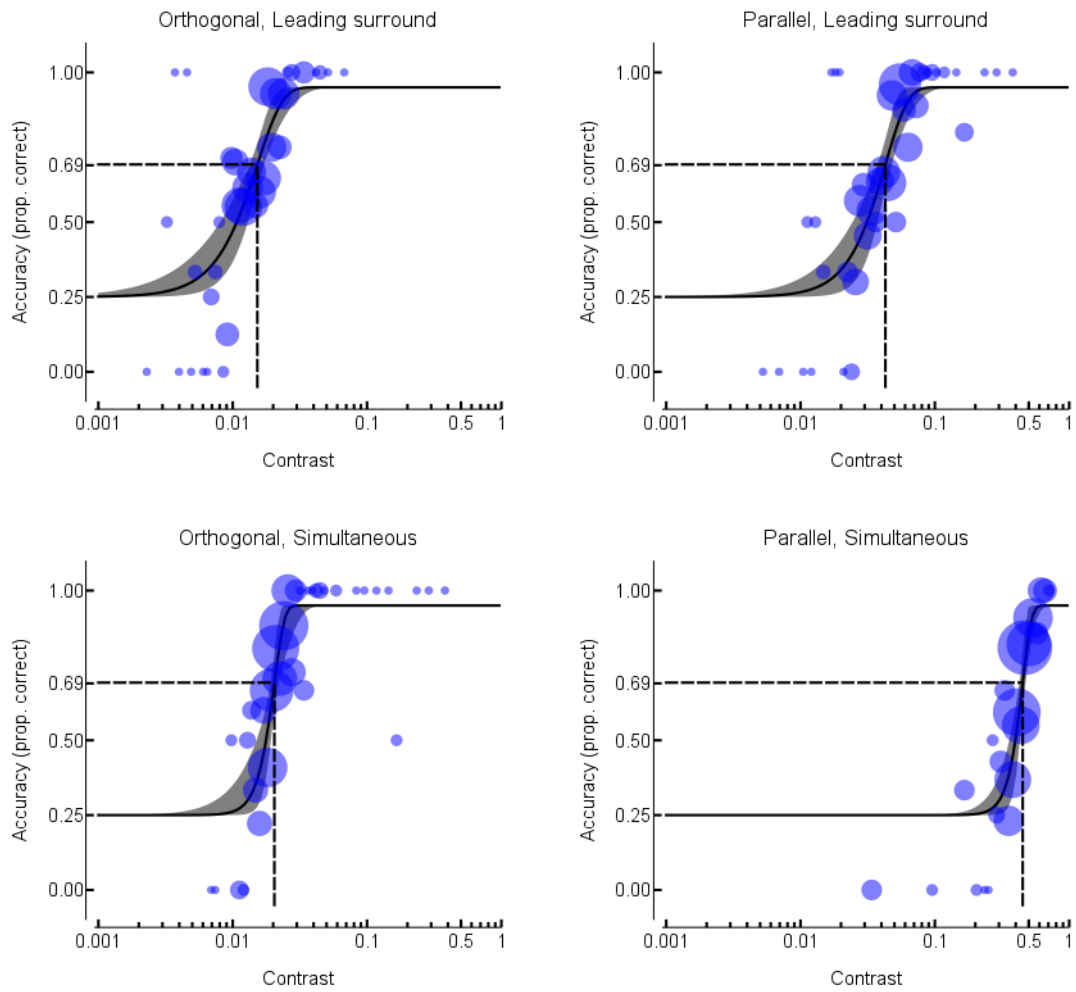



p1101

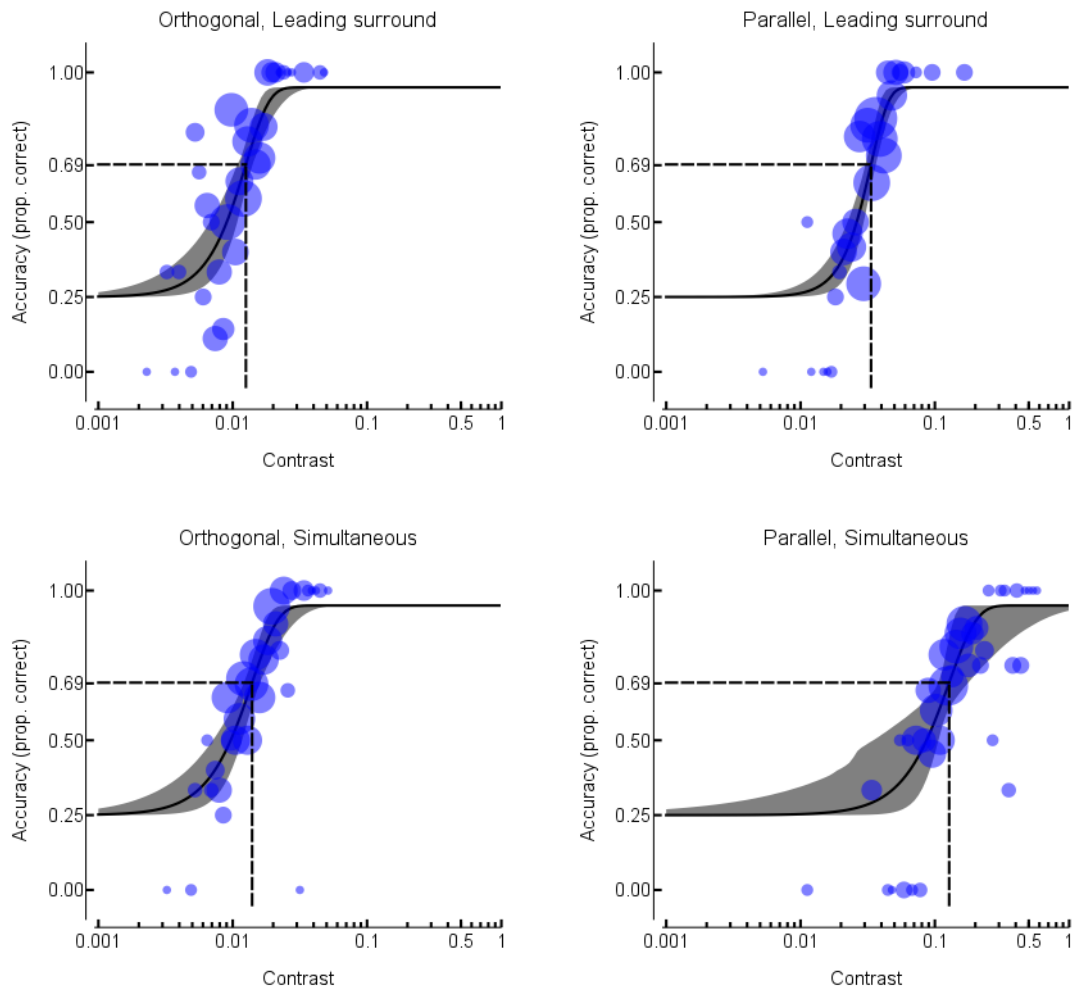

Supplement: peerj-05-2921-s001.pdf [file peerj-05-2921-s001.pdf]
