# Supplementary material for: No apparent influence of psychometrically-defined schizotypy on orientation-dependent contextual modulation of visual contrast detection
Source: PeerJ journal article supplement (doi:10.7717/peerj.2921), 2017-01-24
Supplement: figS2.pdf [file figS2.pdf]

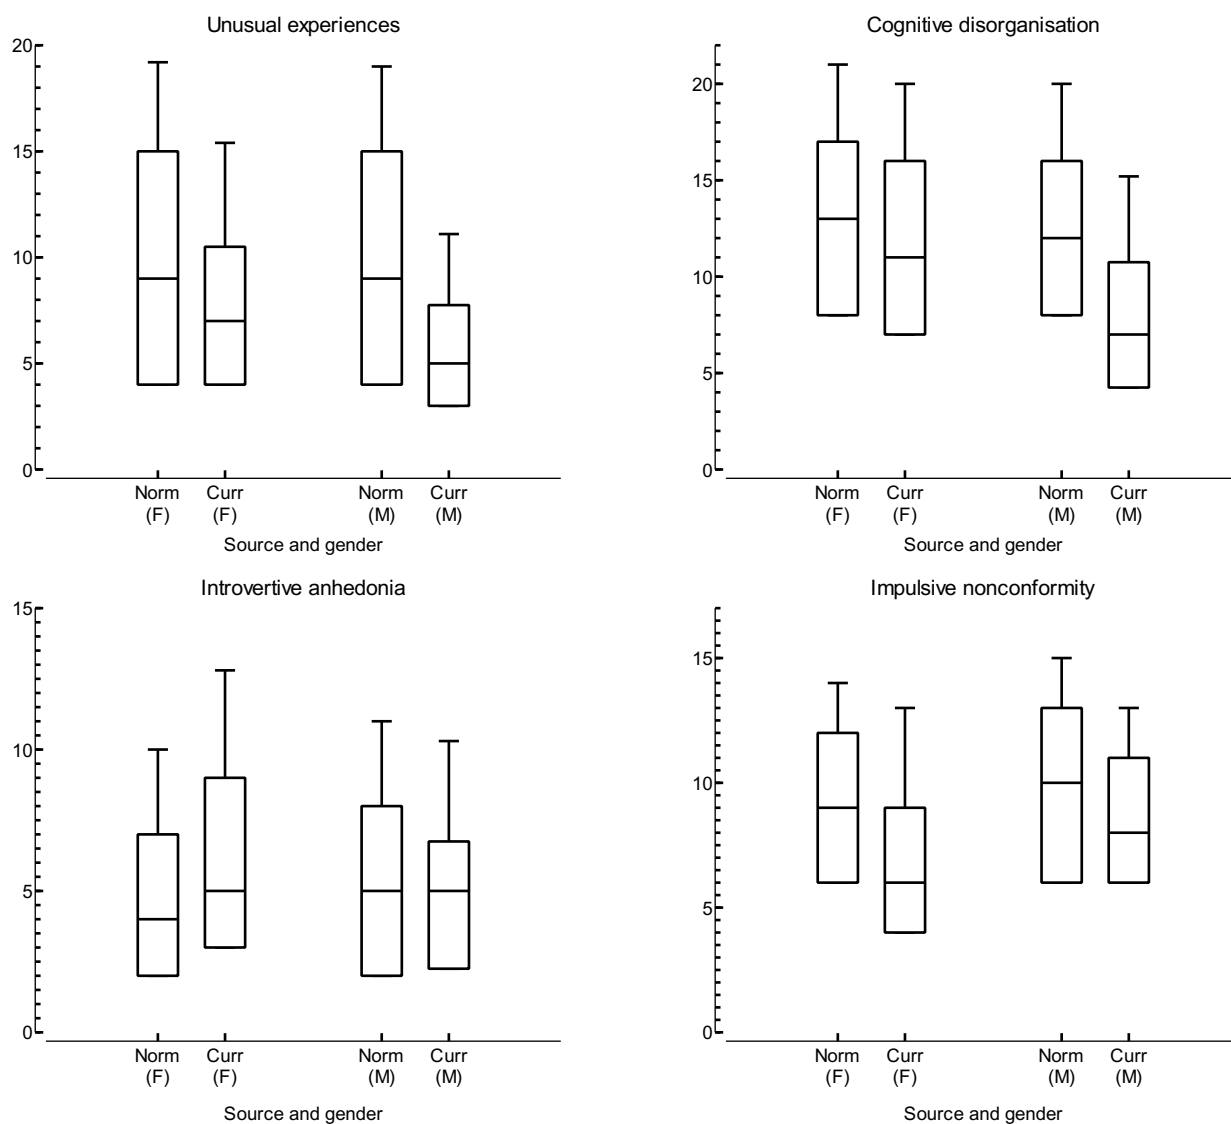

**Fig. S 2** Comparison of the O-LIFE scores reported by Mason & Claridge (1996) and the current study. Panels show the different subscales of the O-LIFE questionnaire, and boxplots show the 25th, 50th, 75th, and 90th percentiles for the “< 22” age group norms reported by Mason & Claridge (1996) and for those obtained in the current study, separated by gender.
