# Supplementary material for: No apparent influence of psychometrically-defined schizotypy on orientation-dependent contextual modulation of visual contrast detection
Source: PeerJ journal article supplement (doi:10.7717/peerj.2921), 2017-01-24
Supplement: figS3.pdf [file figS3.pdf]

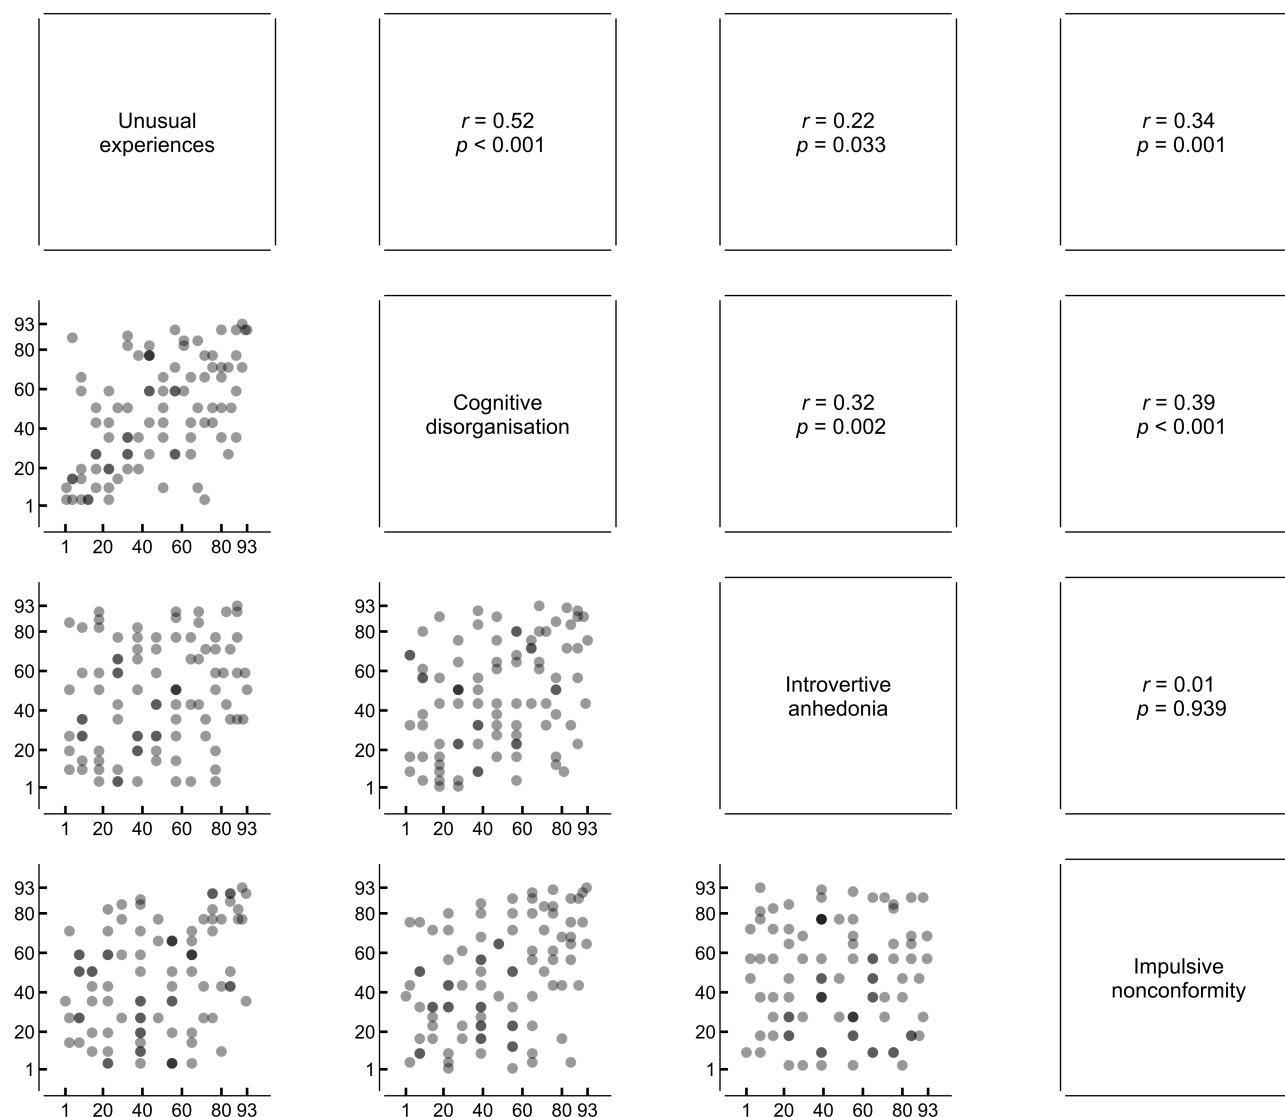

**Fig. S 3** Pairwise correlations between the ranked scores on the O-LIFE subscales. Correlation coefficients and  $p$  values refer to the Pearson correlation on the ranked values (Spearman's correlation).
