# Supplementary material for: No apparent influence of psychometrically-defined schizotypy on orientation-dependent contextual modulation of visual contrast detection
Source: PeerJ journal article supplement (doi:10.7717/peerj.2921), 2017-01-24
Supplement: figS6.pdf [file figS6.pdf]

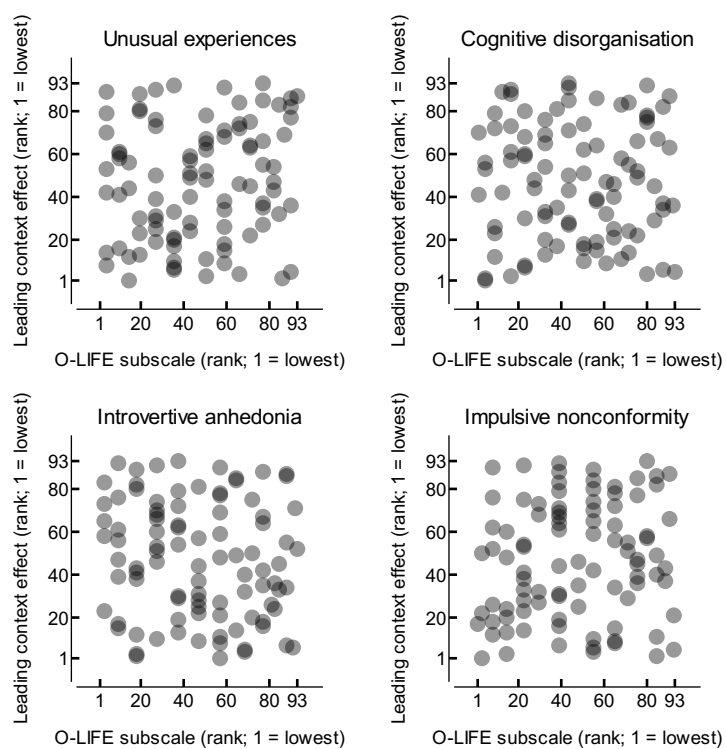

**Fig. S 6** Comparison of ranked schizotypy score and the ranked magnitude of the difference between contrast detection thresholds with parallel and orthogonal context for the ‘leading surround’ condition.
