# Supplementary material for: No apparent influence of psychometrically-defined schizotypy on orientation-dependent contextual modulation of visual contrast detection
Source: PubMed Central journal article supplement (PMC5267566; doi:10.7717/peerj.2921), 2017-01-24
Supplement: peerj-05-2921-s005.pdf [file peerj-05-2921-s005.pdf]

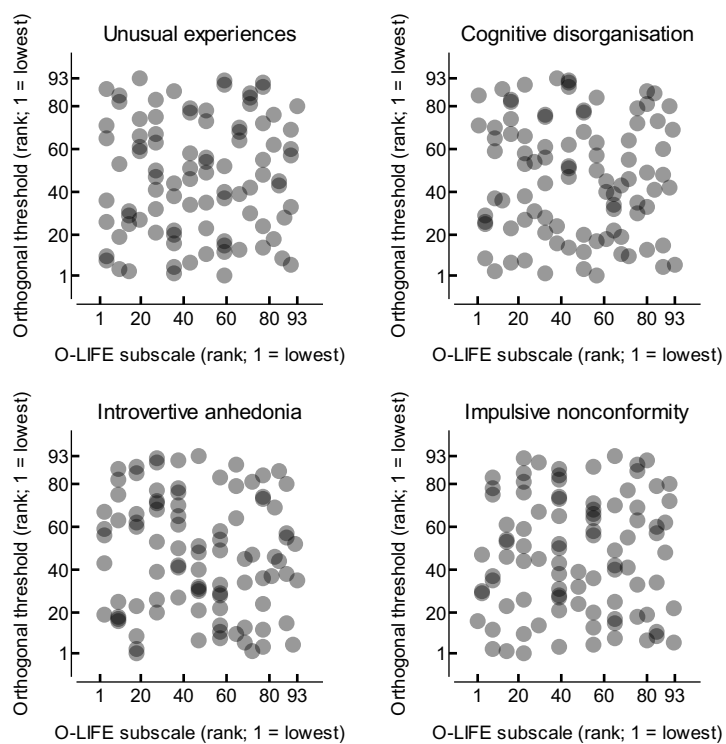

**Fig. S 5** Comparison of ranked schizotypy score and the ranked contrast detection threshold with orthogonal context during simultaneous presentation.
