# Supplementary material for: No apparent influence of psychometrically-defined schizotypy on orientation-dependent contextual modulation of visual contrast detection
Source: PubMed Central journal article supplement (PMC5267566; doi:10.7717/peerj.2921), 2017-01-24
Supplement: peerj-05-2921-s007.pdf [file peerj-05-2921-s007.pdf]

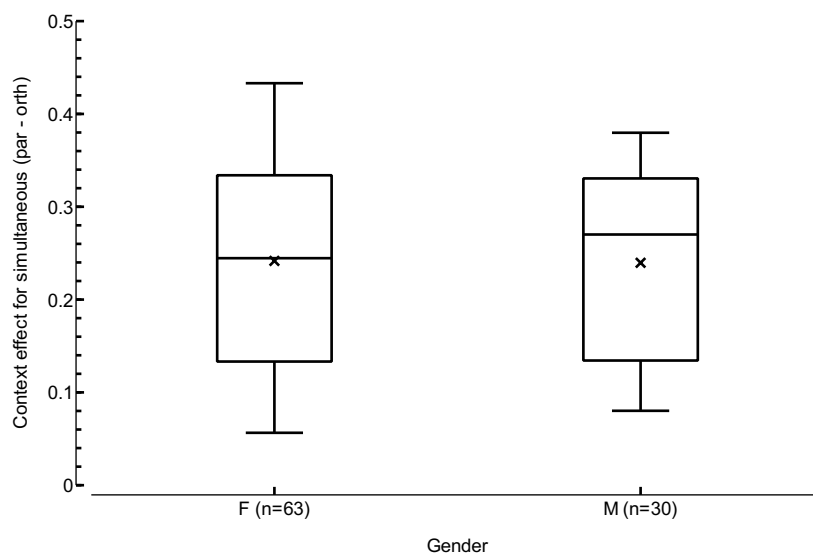

**Fig. S 7** Distribution of orientation-dependent contextual modulation effects for females and males. Boxplots show the difference between the contrast detection thresholds for parallel and orthogonal contexts for simultaneous presentation, separately for females and males.
