# Supplementary material for: No apparent influence of psychometrically-defined schizotypy on orientation-dependent contextual modulation of visual contrast detection
Source: PubMed Central journal article supplement (PMC5267566; doi:10.7717/peerj.2921), 2017-01-24
Supplement: peerj-05-2921-s009.pdf [file peerj-05-2921-s009.pdf]

**Table S 1** Distribution of participant ages, after application of exclusion criteria.

| Age | Count |
|-----|-------|
| 18  | 36    |
| 19  | 35    |
| 20  | 10    |
| 21  | 3     |
| 23  | 4     |
| 25  | 2     |
| 28  | 1     |
| 30  | 1     |
| 31  | 1     |
